# Supplementary material
Source: JCI journal article supplement (doi:10.1172/jci136220)
Supplement: sd1 [file 1]

## Supplementary Materials

|                                                                                                                                            |    |
|--------------------------------------------------------------------------------------------------------------------------------------------|----|
| <b>Table of Contents</b> .....                                                                                                             | 1  |
| <b>Supplementary methods</b> .....                                                                                                         | 2  |
| <b>Supplementary figures</b> .....                                                                                                         | 14 |
| Figure S1: Detailed work flow of the meta-analysis.....                                                                                    | 14 |
| Figure S2: Heatmap representation of innate immune cell enrichment analysis.....                                                           | 15 |
| Figure S3: Identification of differential AR modules and KDGs.....                                                                         | 16 |
| Figure S4: Discriminatory ability of KDGs to differentiate biopsy samples with AR from non-AR in lung and liver transplant data sets.....  | 17 |
| Figure S5: Workflow of therapeutic identification by drug repurposing strategies and selection of minocycline for biologic validation..... | 18 |
| Figure S6: The expression of the remaining key driver genes in murine cardiac allografts harvested at post-operative day 4.....            | 19 |
| Figure S7: Murine cardiac allograft survival following minocycline monotherapy versus saline.....                                          | 21 |
| Figure S8: Evaluation of allograft survival at post-operative day 100.....                                                                 | 22 |
| <b>Supplementary tables</b> .....                                                                                                          | 23 |
| Table S1: Summary of discovery and validation data sets.....                                                                               | 23 |
| Table S2: Full list of the 982 meta-genes identified from the meta-analysis.....                                                           | 25 |
| Table S3: Summary of the downstream genes and out/in-degrees of the 14 KDGs.....                                                           | 69 |
| Table S4: Key drivers-based gene set used for the Connectivity Map query.....                                                              | 74 |
| Table S5: Drug discovery results from Connectivity Map and Drug Bank.....                                                                  | 76 |
| Table S6: Taqman primers for real-time polymerase chain reaction.....                                                                      | 79 |
| <b>References</b> .....                                                                                                                    | 80 |

## Data collection and pre-processing

Normalized microarray datasets and their array annotation files were downloaded from GEO (Table S1). The transcript-level data along with gene annotation for all the public datasets were generated for downstream meta-analysis. A further 2 datasets belonged to our research group as part of the Genomics of Chronic Allograft Dysfunction (GoCAR) study, one of which is published and available via GEO. Datasets were randomly divided into discovery and validation cohorts. Samples were dichotomized to AR (which consisted of TCMR including borderline TCMR, ABMR and mixed cases) or non-AR, as identified by their original studies. The majority of patients in each of these datasets were under CNI-based immunosuppression, as described in their relevant publications. **Discovery Set(1-6):** In the meta-analysis, 2 datasets were from the GoCAR study- GSE57387 (published) which consists of 3 month post-transplant protocol biopsies and GSE138043 which consists of 12 month post-transplant protocol biopsies. Biopsies were scored by the revised Banff 2009 classification of renal allograft pathology, rejection cases here are TCMR including borderline cases. The other 5 publicly available datasets were downloaded from the GEO database: 17 transplant biopsy cases from GSE1563 (7 with acute rejection, 10 from stable allografts without) were graded by the Banff 1995 classification (rejection subtypes not defined at that time) as referenced in their original study. GSE9493 consisted of biopsies from 42 patients graded by Banff 1997 version (rejection subtypes not defined at that time) (7), by two independent pathologists. GSE34437 contained 33 samples from both indication and protocol biopsies of pediatric and young adult patients, with Banff 2007 classification acute TCMR grades IA, IB and borderline cases included in the rejection group. All 403 indication biopsies in GSE36059 were examined by two pathologists (3/5 of samples were read by a third pathologist

additionally). They used a modified Banff classification (2012 classification system) which included C4d negative ABMR and probable ABMR and divided 122 acute rejection cases into ABMR, TCMR and mixed. GSE50084 had 28 samples with ABMR, and 20 normal biopsies. **Validation Set (8-18):** Validation set consisted of 5 publicly available kidney allograft tissue microarray datasets. GSE21374 (282 samples) included TCMR, borderline TCMR and ABMR (Banff 2007), while GSE25902 (120 protocol samples) only included TCMR cases (Banff 2007) (none with ABMR) as the rejection cases for analysis. GSE48581 had 300 biopsies from TCMR versus non-rejection patients (Banff 2007). GSE50058 had 101 samples and acute rejection subtype was not available, and biopsies from GSE14328 (36 samples) were from pediatric recipients and classified according to Banff 2005 classification (rejection cases were TCMR with Banff grades IA, IIA, IIB)(19). Moreover, GSE21374 also contained graft failure/censoring information with post-biopsy follow-up durations ranging from 4 months to 37 years. All heart transplant data sets- GSE2596 (50 samples), GSE4470 (25 samples) and GSE9377 (26 samples) used the International Society of Heart and Lung Transplant (ISHLT) grading system to classify samples. Both GSE6095 (66 samples) and GSE2018 (34 samples) were scored separately on A (vascular) and B (airway) scales according to ISHLT and acute rejection was determined as A + B greater or equal to 2.

### **Meta-Analysis and Meta-Network**

Meta-analysis was performed across the seven microarray datasets using two approaches to identify differential meta-gene signatures between AR and non-AR sample groups: 1) combined effect size and 2) combined p-values. The overlap genes from these two approaches made up the final 982-gene meta-signature for further downstream network construction.

## Combining Effect Size

Effect size refers to the magnitude of effect observed in a study/dataset, independent of sample size. In our bioinformatic analyses, we calculated two measures of effect size : Firstly in the meta-analysis to derive a differential meta-gene signature of AR versus non-AR samples, *Hedges' g* was calculated, which estimates the standardized mean difference of gene expression between groups (20). Secondly in meta-network and module construction, effect size calculation using Fisher z-transformation score was employed (21). Both measures of effect sizes were combined across the datasets later to provide meta effect size.

To estimate the standardized mean difference, unbiased *Hedges' g* was firstly calculated for each probe set as (Eq. 1) (20, 22)

$$g = \left(1 - \frac{3}{4(n_1+n_2)-9}\right) \frac{\bar{x}_1 - \bar{x}_2}{s^*} \quad \text{where } s^* = \sqrt{\frac{(n_1-1)s_1^2 + (n_2-1)s_2^2}{n_1+n_2-2}} \quad (\text{Eq.1})$$

Secondly, we combined ES of probes to gene level for each dataset by applying Fixed-Effects Model (Eq.2), where the ES of each gene was weighted by inverse of variance within each dataset. Then the ES of each gene in each dataset was further combined into one meta-ES across all datasets, using the Random Effects Model in which the amount of heterogeneity ( $\tau^2$ ) was added to denote the between-dataset variance and was estimated via DerSimonian-Laird method. (Eq.3) (23) Finally, a Z-score test was performed to identify significant meta-differentially-expressed genes, and corresponding p values were corrected by Benjamini-Hochberg method.

$$\overline{ES} = \frac{\sum w_i es_i}{\sum w_i} \quad \text{where } w_i = \frac{1}{v_i} \quad (\text{Eq.2})$$

$$\text{or } w_i = \frac{1}{(v_i + \hat{\tau}^2)} \quad (\text{Eq.3})$$

When correlation coefficients are used as the metric of the effect size, one can also weigh and combine them into meta-correlation coefficients in a similar way. We first constructed the co-expression network for each data set for AR and non-AR groups separately and let  $r_{a,b}$  denote the Pearson correlation coefficient between gene  $a$  and gene  $b$ .  $r_{a,b}$  was then converted to a normal Z score (Fisher z-transformation) as (Eq.4)

$$z_{a,b} = \frac{1}{2} \ln \left( \frac{1+r_{a,b}}{1-r_{a,b}} \right) \quad (\text{Eq.4})$$

Thereafter the meta effect size  $\bar{z}_{a,b}$  was computed as Eq.2 and Eq.3 whereas  $v_i = \frac{1}{n_i-3}$ , and  $n_i$  was the sample size of  $i$ th data set. At the final step we reconverted the meta  $\bar{z}_{a,b}$  to a meta-correlation coefficient  $r$ .

### Combining P-values

We calculated p values from limma test(24) for each data set separately and summarize p values into an overall p for each gene using weighted inverse normal method by Marot and Mayer (Eq. 5). Here  $\tilde{p}_g(s)$  denotes individual p value for gene  $g$  in study  $s$  and  $n(s)$  be the sample size of study  $s$ . (25, 26)

$$S_g = \sum_{s=1}^k w_s \Phi^{-1} \left( 1 - \tilde{p}_g(s) \right) \quad \text{Where } w_s = \sqrt{\frac{n(s)}{\sum_{i=1}^k n(i)}} \quad (\text{Eq.5})$$

Since  $S_g$  follows a standard normal distribution, overall significance is obtained by Eq.6. Additionally, the Benjamini-Hochberg method was applied to adjust for multiple testing at  $\alpha = 0.05$ .

$$P_g = 2(1 - \Phi(|S_g|)) \quad (\text{Eq.6})$$

### **Meta-gene and Meta-network definition**

Significant meta-genes were selected if the following conditions were fulfilled: 1) FDR of the combined ES < 0.05; 2) individual ES was in the same direction, either up or down, in at least 6 out of 7 data sets; 3) FDR of combined P-values < 0.05. Meta-co-Expression-Network was identified by picking up gene-gene connections with meta  $|r| \geq 0.6$  and FDR < 0.05.

### **Functional Analysis of meta-genes**

Gene expression profiles of 214 mouse samples across 15 immune cell types on Affymetrix microarray were downloaded from the ImmGene database (<https://www.immgen.org/>). In order to build an immune cell type database containing gene-immune cell type linkage information based on expression levels, we first ranked expression values across samples for each gene to construct an original rank matrix. 100000 random rank matrices were then calculated from 100000 times sample permutations. To obtain significance of each cell type, a permutation test was performed by comparing original matrix to random matrices. The database was constructed by assigning genes to different cell types according to the expression in the cell type compared with random chance. Lastly we input the upregulated meta-genes to the database and performed a Fisher's exact test to identify enriched cell types. Similarly, the Gene Ontology enrichment analysis was performed on the same set of upregulated meta-genes by Fisher's exact test, the database was download directly from <https://david.ncifcrf.gov>.

### **Module Searching and Differential Network**

Markov Cluster Algorithm is a scalable unsupervised cluster algorithm for networks. It is based on random walks which turns a network to a transition probability matrix, thus it tends to discover flows that are more likely to gather together in graphs. An input parameter Inflation  $I$  is needed when learning Markov Cluster structure(27). It is responsible for strengthening dense regions and weakening sparse boundaries by repeatedly raising a single column in transition metric to a non-negative power, and then re-normalizing till convergence (Eq. 7). In our analysis, we used MCL-edge software downloaded from <http://micans.org/mcl/>. We input our Meta-co-expression-Network for AR patients as the initial graph and chose  $I = 5$  to obtain fine-grained clusters(27). Thus Meta-co-expression Network was divided into 31 modules with size larger than 5.

$$(\Gamma_r M)_{pq} = \frac{(M_{pq})^r}{\sum_{i=1}^k (M_{iq})^r} \quad (\text{Eq.7})$$

The Differential Network was done resting on modules identified by MCL. The aim was to see whether connectivity of gene clusters which highly correlated in AR group differentiates from that of the non-AR group. To bring in definition of DN, we first introduced distance between two networks. Because we constructed the Meta-co-expression Network for AR and non-AR patients separately, the distance between AR and non-AR modules can be given by Euclidean distance, adjusted for the size of the gene set considered. (Eq. 8) Here  $r_c^{ACR}$ ,  $r_c^{CTRL}$  are co-expression coefficients in two groups for the same gene pair(28).

$$D(r_c^{ACR}, r_c^{CTRL}) = \sqrt{\frac{1}{P_c} \sum_{p=1}^{P_c} (r_p^{ACR} - r_p^{CTRL})^2} \quad \text{where } P_c = \binom{n_c}{2} \quad (\text{Eq. 8})$$

Likewise, we rebuilt the null Meta-co-expression-Network by randomly shuffling samples into two groups and calculated  $D_{null}$  in 1000 times permutation. P-value was computed as times of  $D_{null}$  larger than  $D_{original}$  divided by 1000. Therefore, Differential Network was defined as

modules with significant ( $p < 0.05$ ) larger distance between AR and non-AR samples than random conditions.

### **Bayesian Network Construction and Key Drivers Identification**

Differentially connected modules were then used to build directed regulatory networks to identify key drivers which may play a causal role in acute rejection and be evaluated as drug targets in AR prophylaxis. SNP information was incorporated as a prior to aid the construction of a directed network.

By examining the association between the expression of meta-genes and genome-wide SNP data, it is possible to identify Expression Quantitative Trait Loci (eQTL) that may inform on the regulation of gene expression in acute rejection pathways to improve the construction of a directed network. Gender- adjusted microarray data of all meta-genes were included for the Pearson correlation test with ~ 10 million SNP dosage data from 122 donors in the GOCAR project. Considering only SNPs that are on the same chromosome with the corresponding gene, SNPs located within 500kb flanking region of such gene were defined as cis-SNPs otherwise they were regarded as trans-SNPs. We first tested the correlation between meta-genes and their cis-SNPs and adjusted p values using the Bonferroni correction method cutting off at 0.05. Genes which were selected with significant cis-SNPs were then used to search for correlated trans-SNPs in the same manner.

Firstly, we performed normalization per sample for each original data set by transforming expression values to a standard Z-score and integrated all 7 datasets into one data set. This new set

contained 241 AR samples which was later used to construct the Bayesian Network in module scale. As mentioned before eQTLs were incorporated as a prior following one rule: assuming SNP  $s$  is in the cis-location to gene  $a$  and in the trans-location to gene  $b$ , meanwhile  $s$  is significantly correlated with expression of both  $a$  and  $b$ , then  $b$  cannot be the parent of  $a$  ( $P(b \rightarrow a) = 0$ )(29).

A Bayesian Network is a directed graph model for reasoning uncertain domains, where nodes represent variables (genes in our analysis) and arrows represent probabilistic dependencies between them. Given a set of variables  $\mathbf{X} = \{X_1, \dots, X_n\}$ , a Bayesian Network is a graph  $\mathbf{G}$  that defines a joint probability distribution where every  $X_i$  only depends on its parents  $\Pi_{X_i}$  (Eq. 9)(30)

$$P(X_1, \dots, X_n) = \prod_{i=1}^n P(X_i | \Pi_{X_i}) \quad (\text{Eq. 9})$$

To learn the structure of the graph, a log-likelihood function was first defined (Eq. 10). Assuming a training set  $\mathcal{D} = \{\mathbf{X}_1, \dots, \mathbf{X}_m\}$  where  $\mathbf{X}_m$  is the  $m$ th instance of  $\mathbf{X}$ , the strategy of learning Bayesian Network is to find a structure  $\mathbf{G}$  and parameter  $\Theta$  that maximizes the likelihood of  $\mathcal{D}$ . Bayesian Information Criterion is one of the commonly used methods that takes into account not only likelihood function but also model complexity (Eq. 11). Therefore, the attempt of learning the structure becomes a heuristic search procedure that optimizes its solution by maximizing the BIC score. Here  $M$  is the number of instances in  $\mathcal{D}$  and  $Dim[\mathbf{G}]$  is the number of parameters in  $\mathbf{G}$  (31).

$$L(\mathcal{D}; \mathbf{G}, \Theta) = \log P(\mathcal{D}; \mathbf{G}, \Theta) = \sum_m \log P(\mathbf{X}_m; \mathbf{G}, \Theta) \quad (\text{Eq. 10})$$

$$BIC(\mathcal{D}, \mathbf{G}) = \max_{\theta} L(\mathcal{D}; \mathbf{G}, \Theta) - \frac{\log M}{2} Dim[\mathbf{G}] \quad (\text{Eq. 11})$$

In this study, a modified hill climbing greedy search algorithm Tabu Search was used (32). It starts with an initial network  $\mathbf{G}_0$  created by eQTL information. In each iteration, it calculates a BIC score for a new structure  $\mathbf{G}'$  by ADDING, DELETING, REVERSING or REPLACING an edge from

the previous structure  $G$ . Finally, the optimum structure  $G_{best}$  is reached when no BIC score of  $G'$  is larger than that of  $G_{best}$ .

We overlapped the Bayesian Network with the Meta-co-expression-Network for identified modules to obtain final directed networks. Gene  $b$  is said to be downstream of Gene  $a$  if it can be reached following paths of origin from  $a$ . In addition, the number of arrows that directly point outward from  $a$  is called an out-degree of Gene  $a$ . For a module of genes, Key Drivers were then selected as genes that had downstream numbers above  $\overline{DS} + \sigma(DS)$  and had out-degrees above  $\overline{OD} + 2\sigma(OD)$ . (29) Furthermore, we defined that if a Key Driver is not in the downstream of any other KDs in the same module it becomes a global driver, otherwise it is a local driver(33).

### **Validation in additional kidney and other solid organ transplant datasets**

The validation of the up-regulation of key driver genes in additional AR datasets was also sought, and evaluated in 5 external kidney datasets along with 3 heart, 2 lung and 2 liver allograft datasets to determine their expression in other solid organ types. The expression of the key driver genes in these datasets between AR and non-AR samples were calculated using the limma test(24). The number of key drivers that were significantly differentially expressed in each dataset for each organ type was counted and expressed as an average percentage per dataset per organ type. A receiver-operating characteristic (ROC) curve analysis of the 14- key driver signature was performed on each of these independent solid organ datasets for validation, and their discriminatory ability for AR versus non-AR samples were compared using area under the curve (AUC) in a pairwise manner. The ROC curve was generated by calculating the geometric means of the identified KDGs, since all were up-regulated. The geometric mean of the KDGs was aligned with AR to produce

true positive rates and false positive rates at different cut-offs, and then plotted these to generate an ROC curve.

### **Survival Analysis**

Expressions of 14 KDGs were fitted into a Cox regression model using “survival” package in R. The median cut-off of the predicted values was used as the cut-off for a ‘low’ versus ‘high’ risk, which was then applied to the GoCAR 3month cohort comprising protocol biopsy samples and the independent dataset GSE21374 which provided graft loss data from biopsy samples (GOCAR which contains 11 graft losses (total 159 patients) and GSE21374 which contains 51 graft losses (total 282 recipients)). Log rank p-value was presented to show significance. Time-dependent ROC curves were estimated using “timeROC” package in R at one and two years post-transplant in the GoCAR dataset, and one and two years post-biopsy in the independent dataset.

### **Computational identification of novel therapeutics for drug repurposing**

The key driver-based signature of AR was used to query Connectivity Map (CMAP), based on the hypothesis that drugs which induce opposing effects on gene expression of this input AR signature would potentially have therapeutic impact on AR. This strategy has been similarly employed by our group previously (34). The 6,100 individual experiments were merged into a single representative signature for each of the 1,309 compounds in the CMAP library, according to the prototype-ranked list method (35). A modified Kolmogorov-Smirnov (KS) algorithm is provided by the CMAP website and used to calculate a connectivity score for each compound which assumes a value from -1 to +1, representing the degree of concordance between each compound’s

transcriptional profile and the AR signature. Ranking of all 1,309 compounds is generated based on the connectivity score. Significance of individual scores was estimated by generating an empirical KS score distribution from the AR input gene set to 1,000 permuted compound signatures.

DrugBank (36) version 5.1.2 'Targets' search tab was also used to input the individual key driver genes, to identify compounds with inhibitory activity against these. Filtering by 'approved' and 'U.S.' as provided by the database was applied to identify drugs with U.S. market availability. The drug targets from CMAP and DrugBank were compared to choose the candidate drug for experimental validation in the mouse heart transplant model.

### **Image analysis**

For IHC image analysis, 10 high powered fields within each CD3 and galectin-3 stained image and 5 high powered fields within each troponin I stained image were randomly selected by an independent observer blinded to the experimental groups, using Aperio Image scope (Version 12.4.0; Leica Biosystem USA). Fields were restricted to within a cross-section of the left ventricle, and the spread of the fields within the cross section was conserved between all analyzed images to prevent grouping of certain areas. Selected fields for CD3 stained images were conserved to ventricular lumen adjacent (3 fields selected), mid-portion of myocardium (5 fields selected) and outer epicardial surface (2 fields selected). Selected fields for troponin stained images were conserved to mid-portion of myocardium (5 fields selected). The staining was quantified by the Positive Pixel Count algorithm (Version 9; Leica Biosystems) as per the manufacturer's instructions, and as per previous studies(37, 38). The ratio of positive pixels over total pixel

number was analyzed per field, and an average of total positive pixels per mm<sup>2</sup> was calculated for each image. For the analysis of the CD3 staining across all experimental groups, the total number of strong, positive pixels was standardized against the total number of pixels. This pixel intensity was chosen to exclude false-positive, weak-intensity pixel count within the cardiac muscle as seen in all experimental group images.

## Data Sets

### Discovery Set

- GOCAR 3m after Tx (n=140)
- GOCAR 12m afterTx (n=52)
- GSE1563 (n=17)
- GSE9493 (n=42)
- GSE34437 (n=33)
- GSE36059 (n=403)
- GSE50084 (n=48)

### Validation Set

- GSE21374 (n=282)
- GSE48581 (n=300)
- GSE25902 (n=120)
- GSE50058 (n=101)
- GSE14328 (n=36)
- GSE2596 (n=50)
- GSE4470 (n=25)
- GSE9377 (n=26)
- GSE6095 (n=66)
- GSE2018 (n=34)
- GSE26625 (n=17)
- GSE13440 (n=22)

## Meta Differential Genes

Combining Effect Size  
(Hedges'sg)  
FDR<0.05 (990 genes)

Combining p value  
(weighted inverse normal method )  
FDR<0.05 (3743 genes)

Overlap (982 genes)  
565 up-regulated  
417 down-regulated

## Key Drivers

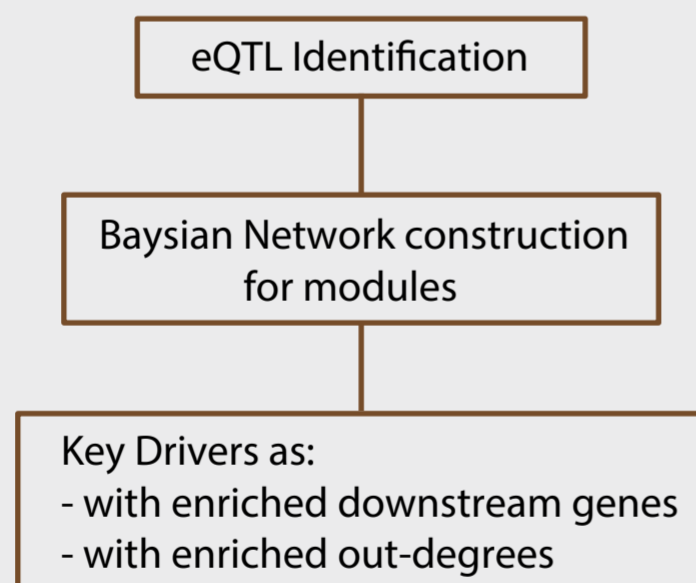

## Correlation Network & Modules

Construct meta correlation network  
weighted Fisher's r-to-Z transformation  
FDR < 0.05 & |coef| >= 0.6

AR network

Non-AR network

Module Identification  
Markov Cluster Algorithm

Differential Network Analysis  
Compare module connectivity between AR and Non-AR samples  
- Euclidean Distance, adjust for size of module  
- Permutation Test

**Figure S1. Detailed work flow of the meta-analysis.** The discovery set consisted of 7 microarray datasets; 12 independent publicly available datasets of 5 kidney, 3 heart, 2 lung and 2 liver transplant biopsy samples were validation sets. 982 meta-genes were identified by overlapping results from combining effect size and combining p-value approaches. Meta-correlation networks were constructed amongst AR samples and non-AR samples separately. We performed Markov Cluster Algorithm in the AR network to obtain sub-modules. Those modules were later compared with the same set of genes in the non-AR network by connectivity using permutation test. Modules which had significantly different connectivity between AR and non-AR samples were used to build directional Bayesian Network. Key drivers in each module were finally identified as the gene with both enriched downstream counts and out-degrees.

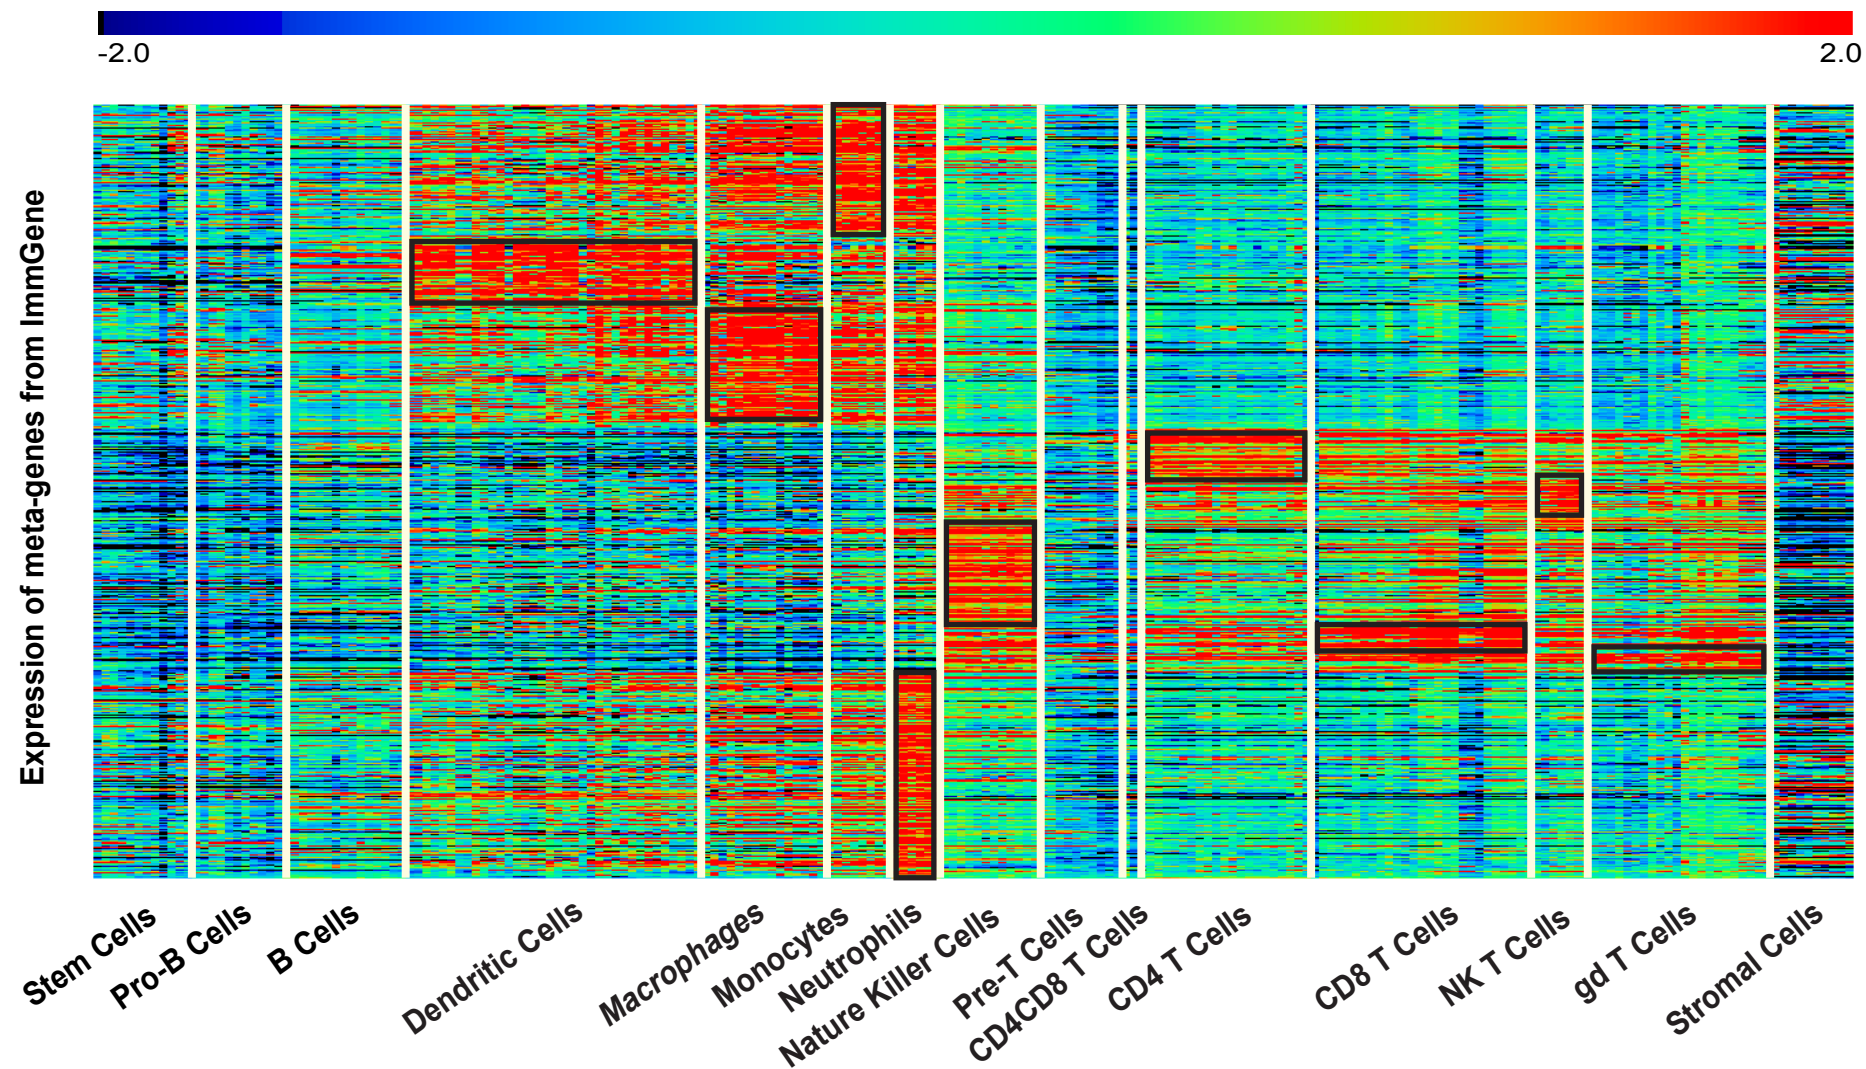

**Figure S2. Heatmap representation of innate immune cell enrichment analysis.** Strong representation of innate immune cell populations was identified amongst the upregulated DEGs by cell enrichment analysis based on ImmGene database. The database contains varying numbers of samples for any given cell type, which is reflected by the segmented width along the x-axis. Color of the heatmap image denotes gene-level normalized (zero-centered) expression value. Significantly enriched cell types with higher expression comparing across other cell populations are highlighted in black boxes.

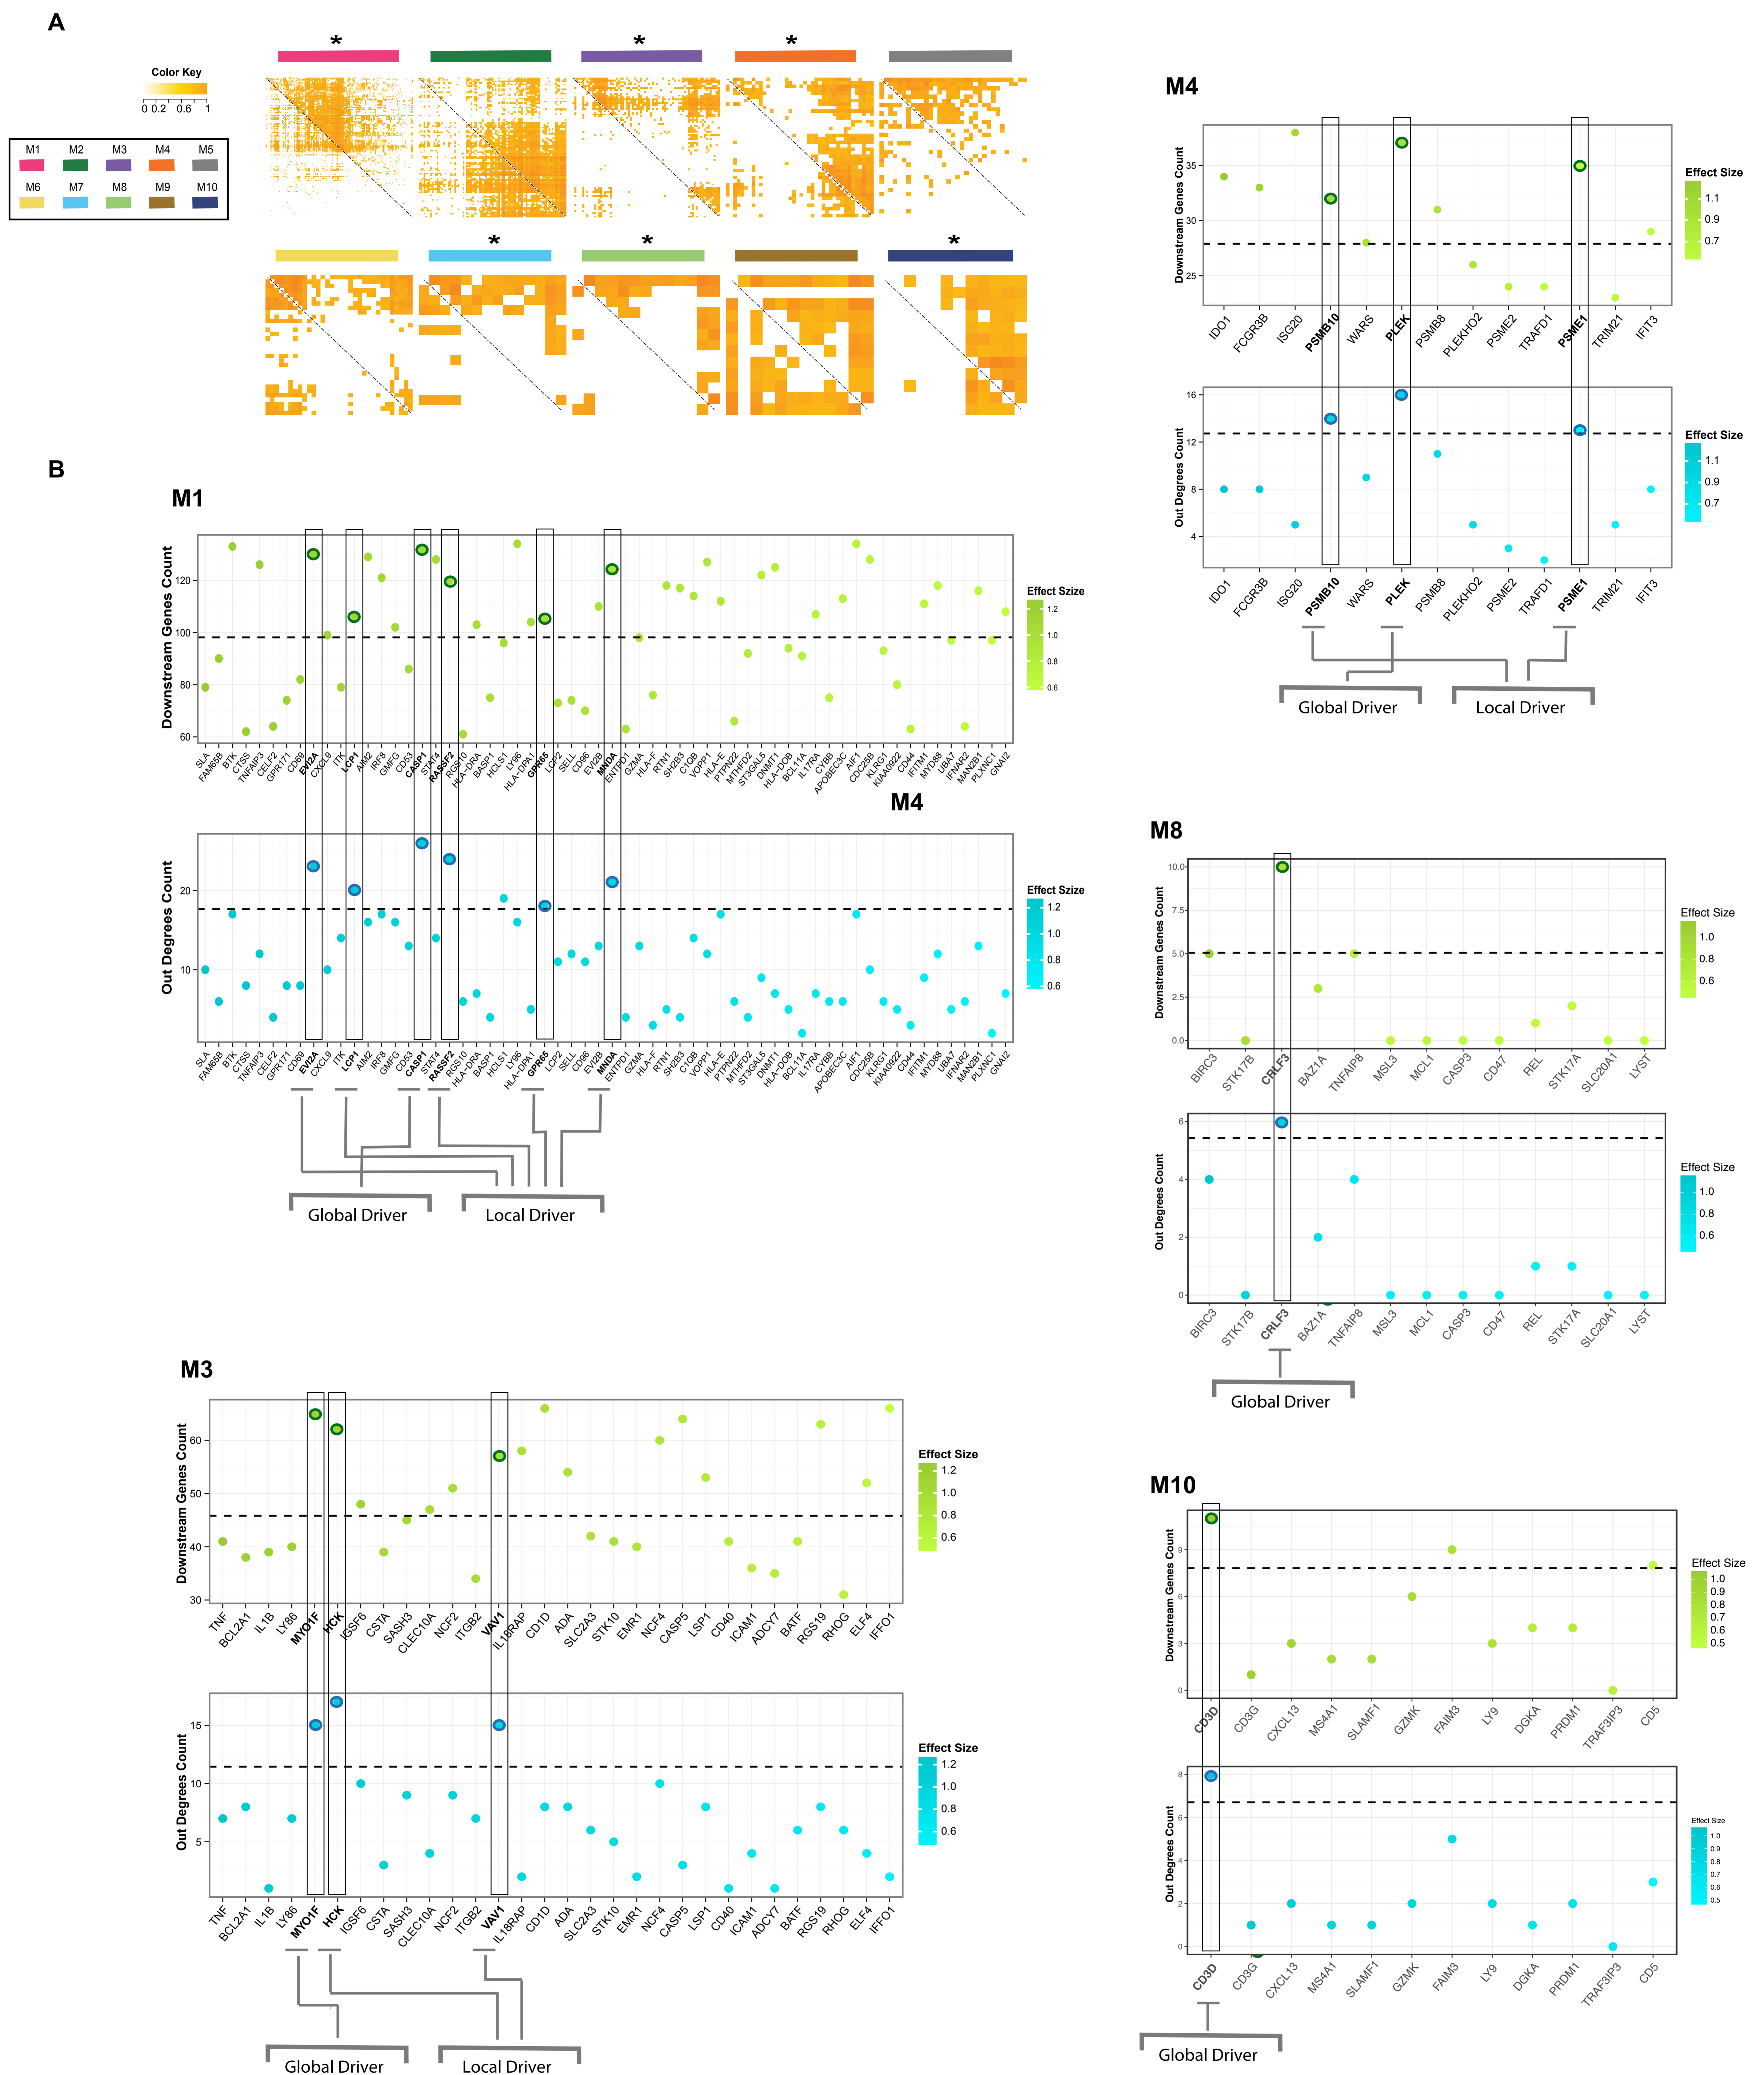

**Figure S3 Identification of differential AR modules and KDGs.** **A)** Heatmaps of network connectivity for the top 10 co-expression-modules. Each heatmap consists of upper triangle part (co-expression connectivity in AR patients) and lower triangle part (co-expression connectivity in no AR patients). Color of heatmap represents correlation coefficient of gene pairs in each module. Differential modules are marked with asterisk. **B)** Key Drivers identification in Module 1, 3, 4, 8, 10. The scatter plots of downstream gene count (upper panel) and out-degree of genes (lower panel) in each module demonstrates the process of Key Driver identification. Genes are ordered by effect size (high to low) and darkness of the either blue or green color indicates level of effect size. M1, M3, M4 only show genes with top downstream count whereas M8 and M10 show all genes in the module due to size limit. Key Drivers are highlighted in black boxes. We selected Key Drivers as genes which had downstream numbers above  $\text{mean}(\text{DS}) + \sigma(\text{DS})$  and had out-degrees above  $\text{mean}(\text{OD}) + 2\sigma(\text{OD})$ . If a Key Driver was not in the downstream of any other KDs in the same module, it became a global driver otherwise it was a local driver.

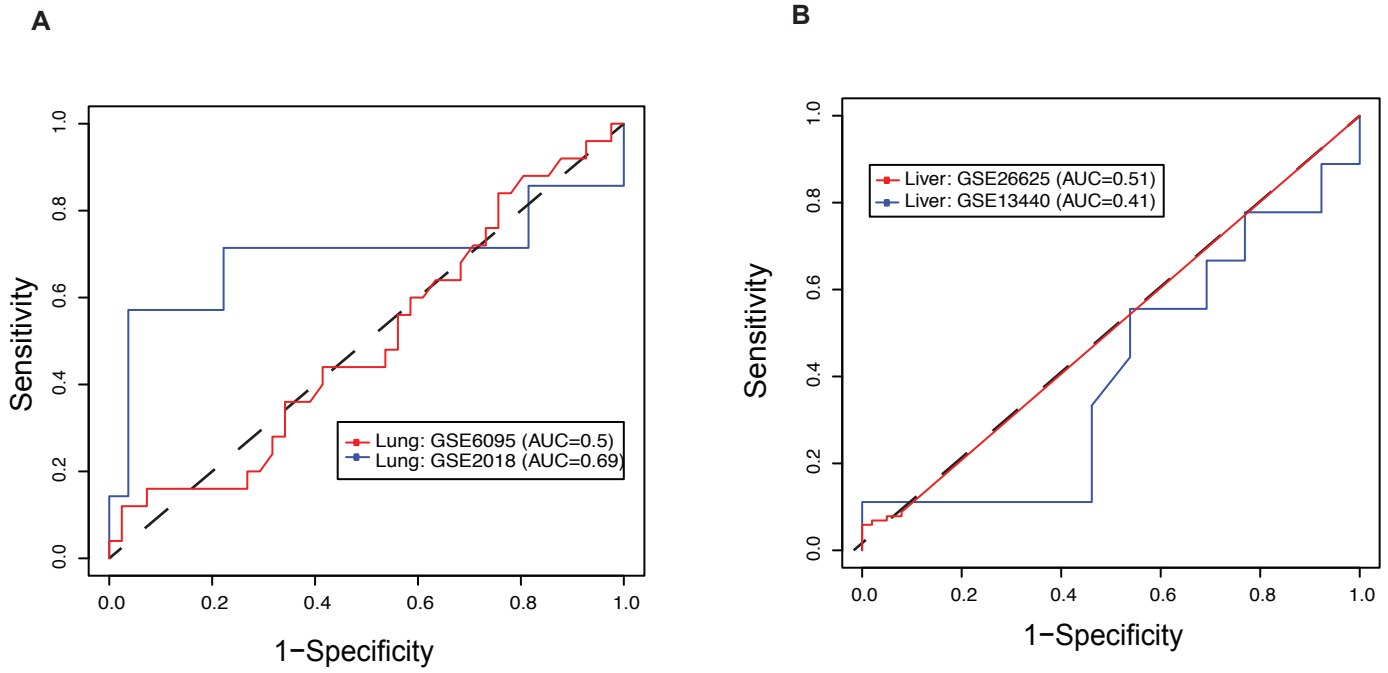

**Figure S4. Discriminatory ability of KDGs to differentiate biopsy samples with AR from non-AR in lung and liver transplant data sets.** ROC curves were generated using the geometric mean of the expression of all 14 KDGs in independent lung (**A**) and liver (**B**) data sets.

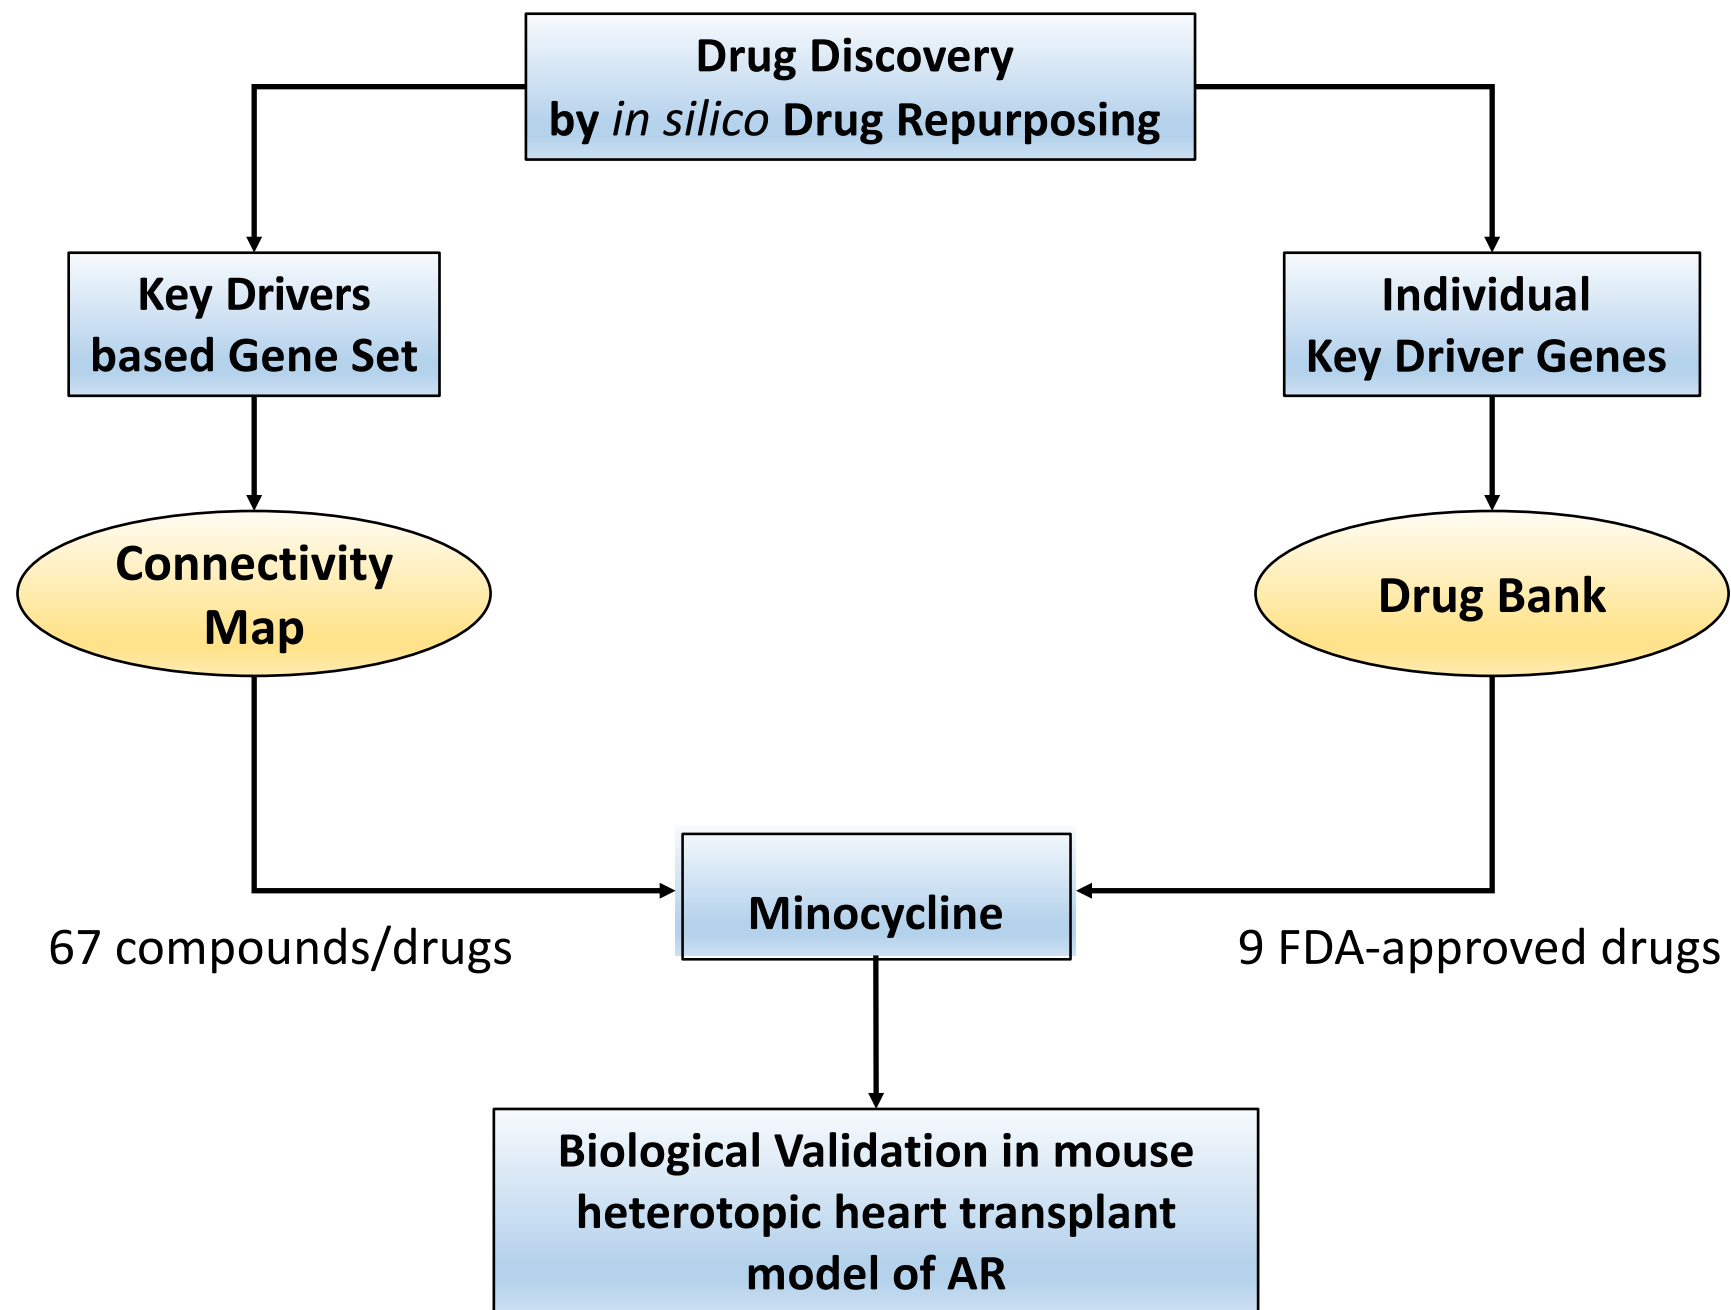

**Figure S5. Workflow.** Minocycline was the only therapeutic agent discovered in both the DrugBank and CMAP interrogation. Individual KDGs were the input target in DrugBank, whilst a key drivers- based gene set was used to query CMAP, the genes in this set were derived from the largest three differential modules of AR, and consisted of 12 KDGs and 30 secondary genes with large out-degrees.

FDA, U.S. Food and Drug Administration

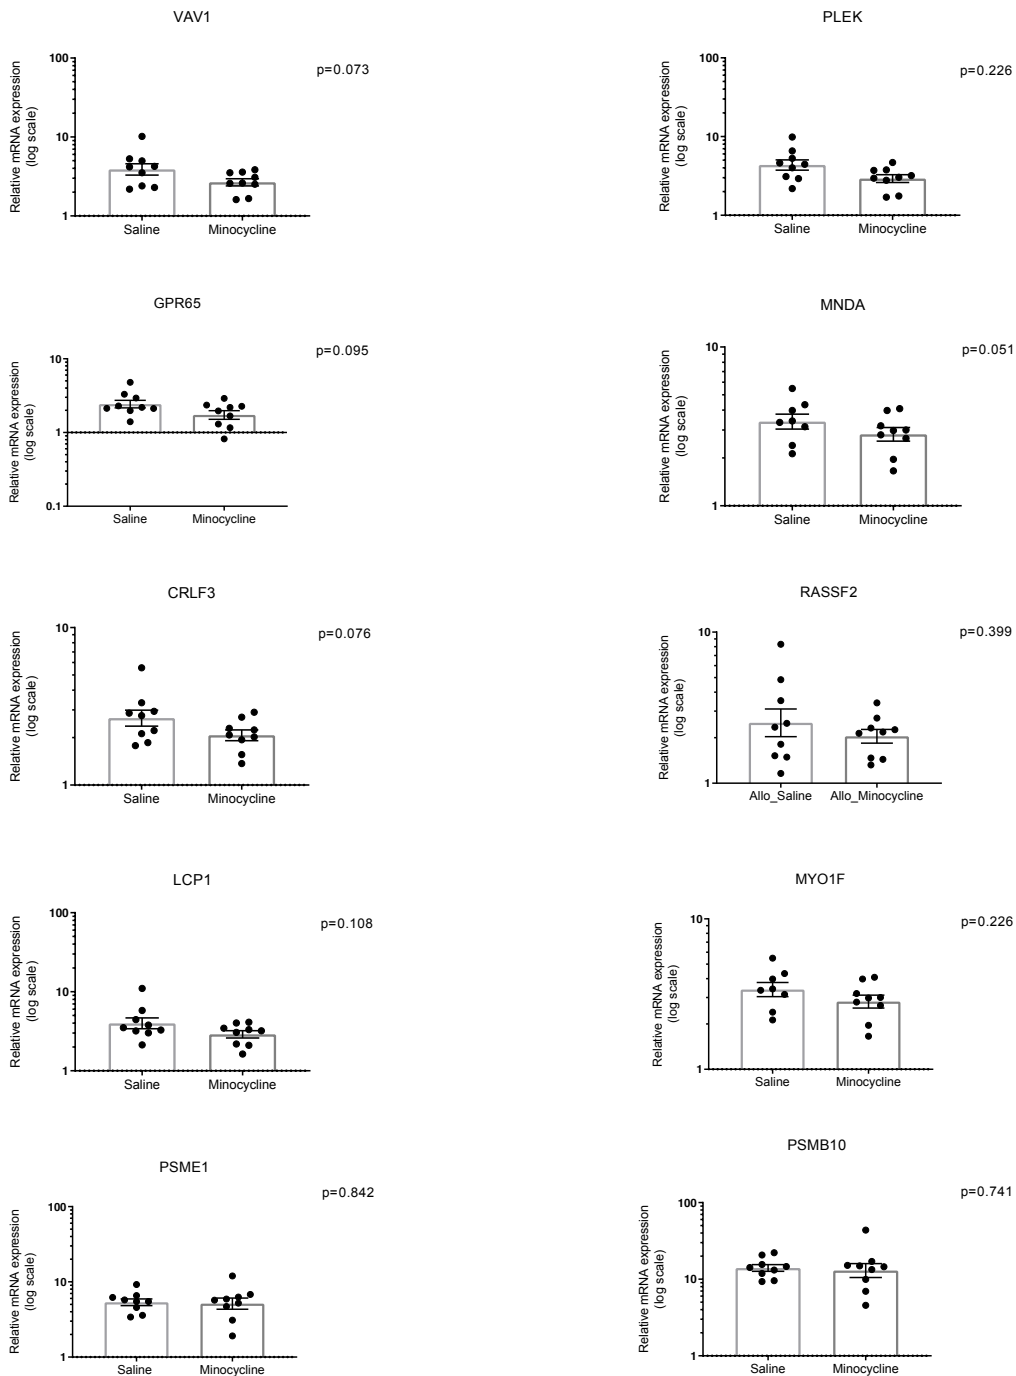

**Figure S6(A).** The expression of the remaining key driver genes in murine cardiac allografts harvested at post-operative day 4.

mRNA transcription expression (presented on a log scale) measured by RT-PCR of 10 of the 14 key driver genes. Relative expression of mRNA transcripts was calculated by the  $\Delta\Delta C_T$  method normalized to expression in a syngeneic transplant group with GAPDH as the house keeper gene. Student's t-test was used for comparing normally distributed data, Mann-Whitney U-Test was used for non-normally distributed data. Data was presented as mean  $\pm$  SEM (\* $p < 0.05$ ).

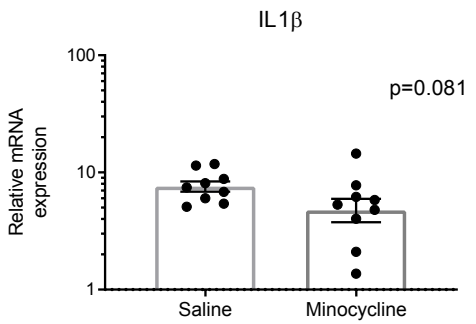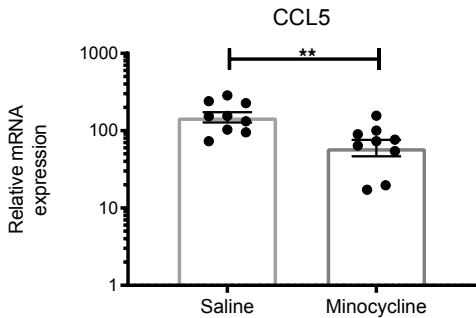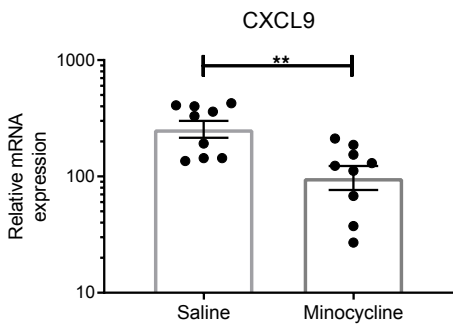

**Figure S6(B). The expression of additional pro-inflammatory cytokines in murine cardiac allografts harvested at post-operative**

**day 4.** mRNA transcript expression (presented on a log scale) measured by RT-PCR of IL1 $\beta$ , CXCL9 and CCL5. Relative expression of mRNA transcripts was calculated by the  $\Delta\Delta$ CT method normalized to expression in a syngeneic transplant group with GAPDH as the house keeper gene. Student's t-test was used for comparing normally distributed data, Mann-Whitney U-Test was used for non-normally distributed data. Data was presented as mean  $\pm$  SEM (\*p<0.05).

A

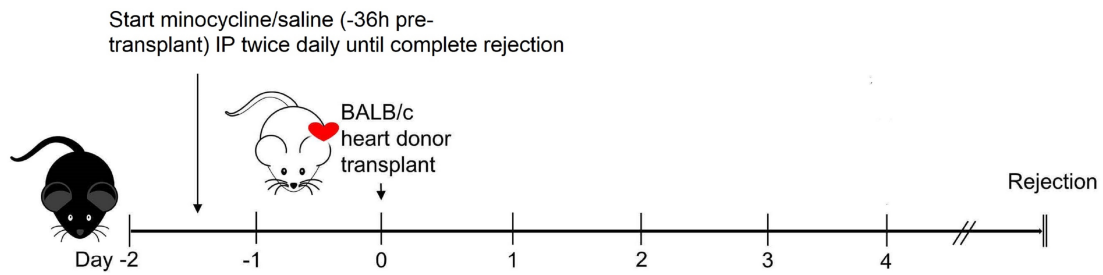

B

### Allograft survival: minocycline versus saline

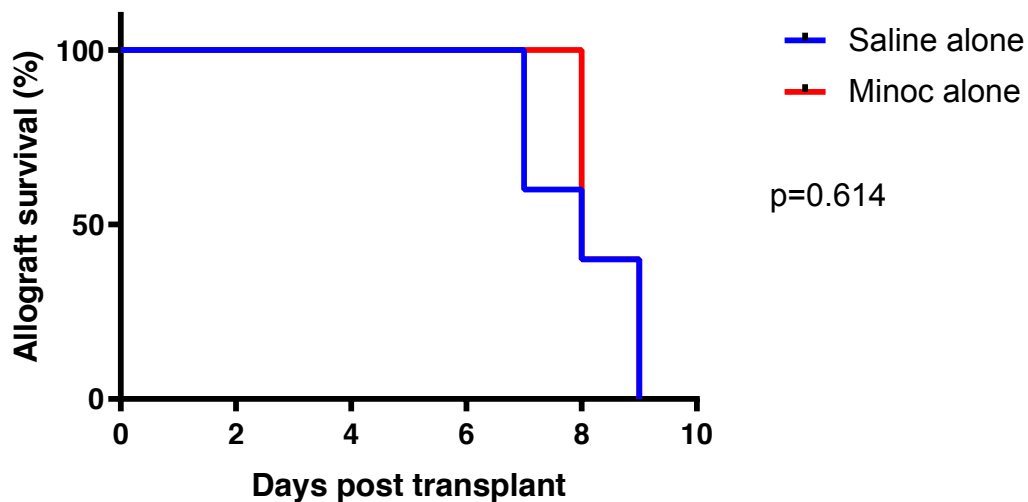

**Figure S7. Murine cardiac allograft survival following minocycline monotherapy versus saline. (A)** Minocycline or saline monotherapy was administered starting 36 hours prior to transplant twice daily until complete allograft rejection (cessation of allograft beat). **(B)** No significant difference was observed in allograft survival between transplanted animals treated with minocycline versus saline through to allograft loss (n=5 each group). Kaplan-Meier survival was assessed by log-rank analysis, with significance level at  $p < 0.05$ .

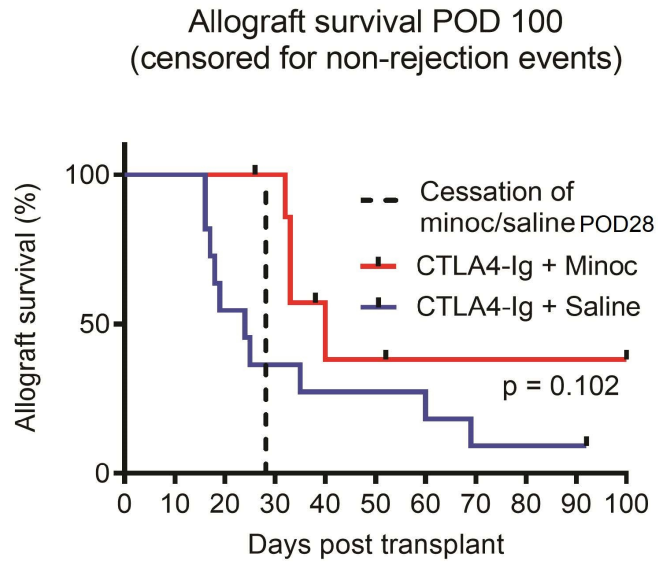

**Figure S8. Evaluation of allograft survival at POD 100.** When re-evaluated at the end of the experimental period at POD 100, there was no statistically significant difference between the two groups ( $p=0.102$ ). Kaplan-Meier survival analysis using the log-rank test was applied to compare allograft survival at PODs 100.

**Table S1.** Summary of discovery and validation microarray data sets of clinical biopsy samples from kidney, heart, lung and liver transplants.

| Organ                      | Dataset           | Sample Size | Platform | Number of acute rejection cases and subtype* | Biopsy type (protocol versus indication) of rejection cases | Reference                               |
|----------------------------|-------------------|-------------|----------|----------------------------------------------|-------------------------------------------------------------|-----------------------------------------|
| <b>Discovery Datasets</b>  |                   |             |          |                                              |                                                             |                                         |
| <b>Kidney</b>              | GSE57387 (GOCAR)  | 140         | GPL5175  | 31 TCMR                                      | Protocol (3 months post TX)                                 | O'Connell PJ et al. Lancet 2016         |
|                            | GSE138043 (GOCAR) | 52          | GPL5175  | 15 TCMR                                      | Protocol (12 months post TX)                                | This paper                              |
|                            | GSE1563           | 17          | GPL8300  | 7                                            | Indication                                                  | Flechner SM et al. Am J Transplant 2004 |
|                            | GSE9493           | 42          | GPL570   | 21                                           | Indication                                                  | Saint-Mezard P et al. Transpl Int 2009  |
|                            | GSE34437          | 33          | GPL570   | 17 TCMR                                      | Indication and protocol                                     | Roedder S et al. PLoS ONE 2013          |
|                            | GSE36059          | 403         | GPL570   | 35 TCMR, 65 ABMR, 22 Mixed                   | Indication                                                  | Reeve J et al. Am J Transplant 2013     |
|                            | GSE50084          | 48          | GPL6244  | 28 ABMR                                      | Indication                                                  | Ó Broin P et al. Genom Data 2014        |
| <b>Validation Datasets</b> |                   |             |          |                                              |                                                             |                                         |
| <b>Kidney</b>              | GSE21374          | 282         | GPL570   | 76 TCMR/ABMR/Mixed                           | Indication                                                  | Einecke G et al. J Clin Invest 2010     |
|                            | GSE48581          | 300         | GPL570   | 32 TCMR, 40 ABMR, 6 Mixed                    | Indication                                                  | Halloran P et al. Am J Transplant 2013  |
|                            | GSE25902          | 120         | GPL570   | 24 TCMR                                      | Protocol                                                    | Naesens M et al. Kidney Int 2011        |
|                            | GSE50058          | 101         | GPL570   | 43                                           | Not specified                                               | Khatri P et al. J Exp Med 2013          |
|                            | GSE14328          | 36          | GPL570   | 17                                           | Not specified                                               | Ling XB et al. J Am Soc Nephrol 2010    |
| <b>Heart</b>               | GSE2596           | 50          | GPL1053  | 16                                           | Indication                                                  | Morgun A et al. Circ Res 2006           |
|                            | GSE4470           | 25          | GPL1053  | 12                                           | Indication                                                  | Morgun A et al. Circ Res 2006           |
|                            | GSE9377           | 26          | GPL887   | 12                                           | Indication                                                  | Holweg CT et al. Circulation 2011       |
| <b>Lung</b>                | GSE6095           | 66          | GPL96    | 25                                           | Protocol and Indication                                     | Patil J et al. Transplantation 2008     |

|              |          |    |         |   |                         |                                                 |
|--------------|----------|----|---------|---|-------------------------|-------------------------------------------------|
|              | GSE2018  | 34 | GPL96   | 7 | Protocol and Indication | Gimino VJ et al. Am J Respir Crit Care Med 2003 |
| <b>Liver</b> | GSE26625 | 17 | GPL6947 | 9 | Protocol                | Bohne F et al. J Clin Invest 2012               |
|              | GSE13440 | 22 | GPL1291 | 9 | Indication              | Asaoka T et al. Liver Transpl 2009              |

GOCAR, Genomics of chronic allograft dysfunction study; GSE, Gene Expression Omnibus Series; TCMR, T-cell mediated rejection; ABMR, antibody mediated rejection; TX, transplant. \*Acute rejection subtype (TCMR, ABMR or mixed) specified for kidney biopsy datasets if available from the original studies, TCMR includes borderline cases.

**Table S1. Full list of the 982 meta-genes identified from the meta-analysis.** Meta-p-values are adjusted by FDR correction method.

| <b>Gene Symbol</b> | <b>RefSeq Accession</b> | <b>Full Name</b>                                                                  | <b>Meta-Effect Size*</b> | <b>Meta-p-value</b> |
|--------------------|-------------------------|-----------------------------------------------------------------------------------|--------------------------|---------------------|
| <b>CD86</b>        | NM_176892               | CD86 molecule                                                                     | 1.40                     | 1.97E-03            |
| <b>IFNG</b>        | NM_000619               | interferon, gamma                                                                 | 1.36                     | 1.16E-04            |
| <b>CXCL11</b>      | NM_005409               | chemokine (C-X-C motif) ligand 11                                                 | 1.36                     | 4.99E-03            |
| <b>LST1</b>        | NM_205837               | leukocyte specific transcript 1                                                   | 1.34                     | 1.40E-06            |
| <b>IL2RB</b>       | NM_000878               | interleukin 2 receptor, beta                                                      | 1.33                     | 5.62E-06            |
| <b>AOAH</b>        | NM_001637               | acyloxyacyl hydrolase (neutrophil)                                                | 1.32                     | 1.23E-03            |
| <b>SLA</b>         | NM_006748               | Src-like-adaptor                                                                  | 1.28                     | 2.09E-06            |
| <b>IL10RA</b>      | NR_026691               | interleukin 10 receptor, alpha                                                    | 1.28                     | 1.11E-06            |
| <b>IDO1</b>        | NM_002164               | indoleamine 2,3-dioxygenase 1                                                     | 1.27                     | 2.08E-07            |
| <b>PRKCB</b>       | NM_212535               | protein kinase C, beta                                                            | 1.27                     | 5.18E-03            |
| <b>TNFRSF9</b>     | NM_001561               | tumor necrosis factor receptor superfamily, member 9                              | 1.26                     | 8.88E-04            |
| <b>TNF</b>         | NM_000594               | tumor necrosis factor                                                             | 1.26                     | 1.73E-03            |
| <b>FAM65B</b>      | NM_001286446            | family with sequence similarity 65, member B                                      | 1.26                     | 9.34E-03            |
| <b>BTK</b>         | NM_001287344            | Bruton agammaglobulinemia tyrosine kinase                                         | 1.24                     | 3.98E-04            |
| <b>CTSS</b>        | NM_001199739            | cathepsin S                                                                       | 1.23                     | 6.49E-04            |
| <b>TNFAIP3</b>     | NM_001270507            | tumor necrosis factor, alpha-induced protein 3                                    | 1.23                     | 2.98E-04            |
| <b>PMAIP1</b>      | NM_021127               | phorbol-12-myristate-13-acetate-induced protein 1                                 | 1.23                     | 6.30E-03            |
| <b>CSF2RB</b>      | NM_000395               | colony stimulating factor 2 receptor, beta, low-affinity (granulocyte-macrophage) | 1.22                     | 2.08E-07            |
| <b>CELF2</b>       | NM_001083591            | CUGBP, Elav-like family member 2                                                  | 1.22                     | 2.47E-03            |
| <b>CD8A</b>        | NM_001145873            | CD8a molecule                                                                     | 1.20                     | 1.02E-03            |
| <b>GPR171</b>      | NM_013308               | G protein-coupled receptor 171                                                    | 1.19                     | 1.60E-04            |

|               |              |                                                             |      |          |
|---------------|--------------|-------------------------------------------------------------|------|----------|
| <b>FGR</b>    | NM_005248    | feline Gardner-Rasheed sarcoma viral oncogene homolog       | 1.19 | 2.56E-04 |
| <b>CD69</b>   | NM_001781    | CD69 molecule                                               | 1.19 | 8.68E-04 |
| <b>TAP1</b>   | NM_001292022 | transporter 1, ATP-binding cassette, sub-family B (MDR/TAP) | 1.18 | 5.00E-06 |
| <b>EVI2A</b>  | NM_014210    | ecotropic viral integration site 2A                         | 1.18 | 2.21E-03 |
| <b>CXCL9</b>  | NM_002416    | chemokine (C-X-C motif) ligand 9                            | 1.18 | 1.36E-06 |
| <b>BCL2A1</b> | NM_001114735 | BCL2-related protein A1                                     | 1.17 | 1.32E-03 |
| <b>IL1B</b>   | NM_000576    | interleukin 1, beta                                         | 1.17 | 1.48E-04 |
| <b>LY86</b>   | NM_004271    | lymphocyte antigen 86                                       | 1.16 | 2.08E-03 |
| <b>ICOS</b>   | NM_012092    | inducible T-cell co-stimulator                              | 1.16 | 2.02E-04 |
| <b>FCGR3B</b> | NM_000570    | Fc fragment of IgG, low affinity IIIb, receptor (CD16b)     | 1.16 | 1.40E-06 |
| <b>ITK</b>    | NM_005546    | IL2-inducible T-cell kinase                                 | 1.16 | 2.85E-03 |
| <b>MYO1F</b>  | NM_012335    | myosin IF                                                   | 1.16 | 1.36E-06 |
| <b>LCPI</b>   | NM_002298    | lymphocyte cytosolic protein 1 (L-plastin)                  | 1.16 | 2.16E-04 |
| <b>EGR2</b>   | NM_001136179 | early growth response 2                                     | 1.15 | 6.02E-04 |
| <b>UBD</b>    | NM_006398    | ubiquitin D                                                 | 1.14 | 1.16E-05 |
| <b>KLRD1</b>  | NM_002262    | killer cell lectin-like receptor subfamily D, member 1      | 1.14 | 3.30E-03 |
| <b>HCK</b>    | NM_001172133 | hemopoietic cell kinase                                     | 1.14 | 1.36E-06 |
| <b>IGSF6</b>  | NM_005849    | immunoglobulin superfamily, member 6                        | 1.14 | 7.55E-04 |
| <b>BIRC3</b>  | NM_001165    | baculoviral IAP repeat containing 3                         | 1.14 | 1.52E-02 |
| <b>CXCL10</b> | NM_001565    | chemokine (C-X-C motif) ligand 10                           | 1.13 | 1.85E-06 |
| <b>AIM2</b>   | NM_004833    | absent in melanoma 2                                        | 1.13 | 1.40E-06 |
| <b>FAM49A</b> | NM_030797    | family with sequence similarity 49, member A                | 1.13 | 3.46E-05 |
| <b>IRF8</b>   | NM_002163    | interferon regulatory factor 8                              | 1.12 | 2.09E-06 |
| <b>IRF1</b>   | NM_002198    | interferon regulatory factor 1                              | 1.12 | 2.08E-07 |
| <b>GMFG</b>   | NM_004877    | glia maturation factor, gamma                               | 1.12 | 6.72E-04 |

|                 |              |                                                                                         |      |          |
|-----------------|--------------|-----------------------------------------------------------------------------------------|------|----------|
| <b>FCER1G</b>   | NM_004106    | Fc fragment of IgE, high affinity I, receptor for; gamma polypeptide                    | 1.12 | 2.18E-05 |
| <b>IL2RG</b>    | NM_000206    | interleukin 2 receptor, gamma                                                           | 1.12 | 2.45E-06 |
| <b>CD53</b>     | NM_000560    | CD53 molecule                                                                           | 1.11 | 1.82E-03 |
| <b>RGS1</b>     | NM_002922    | regulator of G-protein signaling 1                                                      | 1.11 | 6.05E-03 |
| <b>RHOH</b>     | NM_001278366 | ras homolog family member H                                                             | 1.10 | 2.00E-03 |
| <b>EMR2</b>     | NM_013447    | egf-like module containing, mucin-like, hormone receptor-like 2                         | 1.09 | 5.44E-04 |
| <b>CASP1</b>    | NM_001223    | caspase 1, apoptosis-related cysteine peptidase                                         | 1.09 | 6.82E-05 |
| <b>ISG20</b>    | NM_002201    | interferon stimulated exonuclease gene 20kDa                                            | 1.08 | 5.48E-07 |
| <b>CSK</b>      | NM_001127190 | c-src tyrosine kinase                                                                   | 1.08 | 2.61E-03 |
| <b>STAT4</b>    | NM_001243835 | signal transducer and activator of transcription 4                                      | 1.08 | 5.54E-06 |
| <b>RASSF2</b>   | NM_014737    | Ras association (RalGDS/AF-6) domain family member 2                                    | 1.08 | 1.14E-03 |
| <b>SRGN</b>     | NM_002727    | serglycin                                                                               | 1.08 | 7.88E-04 |
| <b>NKG7</b>     | NM_005601    | natural killer cell granule protein 7                                                   | 1.07 | 7.91E-06 |
| <b>PIK3CG</b>   | NM_001282427 | phosphatidylinositol-4,5-bisphosphate 3-kinase, catalytic subunit gamma                 | 1.07 | 1.05E-02 |
| <b>HLA-DPB1</b> | NM_002121    | major histocompatibility complex, class II, DP beta 1                                   | 1.06 | 6.45E-04 |
| <b>RGS10</b>    | NM_001005339 | regulator of G-protein signaling 10                                                     | 1.06 | 2.39E-03 |
| <b>CD48</b>     | NM_001778    | CD48 molecule                                                                           | 1.06 | 2.51E-04 |
| <b>RAC2</b>     | NM_002872    | ras-related C3 botulinum toxin substrate 2 (rho family, small GTP binding protein Rac2) | 1.06 | 1.44E-04 |
| <b>CSF1R</b>    | NM_005211    | colony stimulating factor 1 receptor                                                    | 1.05 | 1.02E-05 |
| <b>HLA-DRA</b>  | NM_019111    | major histocompatibility complex, class II, DR alpha                                    | 1.05 | 9.04E-04 |
| <b>CD3D</b>     | NM_001040651 | CD3d molecule, delta (CD3-TCR complex)                                                  | 1.05 | 1.48E-04 |
| <b>CSTA</b>     | NM_005213    | cystatin A (stefin A)                                                                   | 1.05 | 1.10E-03 |
| <b>ADAM19</b>   | NM_033274    | ADAM metallopeptidase domain 19                                                         | 1.04 | 2.96E-03 |

|                 |              |                                                                                   |      |          |
|-----------------|--------------|-----------------------------------------------------------------------------------|------|----------|
| <b>CCR7</b>     | NM_001838    | chemokine (C-C motif) receptor 7                                                  | 1.04 | 6.16E-03 |
| <b>BASP1</b>    | NM_001271606 | brain abundant, membrane attached signal protein 1                                | 1.04 | 1.44E-02 |
| <b>GZMB</b>     | NM_004131    | granzyme B (granzyme 2, cytotoxic T-lymphocyte-associated serine esterase 1)      | 1.04 | 1.27E-05 |
| <b>CD52</b>     | NM_001803    | CD52 molecule                                                                     | 1.04 | 3.36E-04 |
| <b>FCN1</b>     | NM_002003    | ficolin (collagen/fibrinogen domain containing) 1                                 | 1.04 | 2.30E-05 |
| <b>HCLS1</b>    | NM_005335    | hematopoietic cell-specific Lyn substrate 1                                       | 1.04 | 8.02E-05 |
| <b>PRF1</b>     | NM_001083116 | perforin 1 (pore forming protein)                                                 | 1.04 | 1.40E-06 |
| <b>HLA-DMB</b>  | NM_002118    | major histocompatibility complex, class II, DM beta                               | 1.03 | 1.28E-05 |
| <b>SP140</b>    | NM_001278452 | SP140 nuclear body protein                                                        | 1.03 | 2.56E-04 |
| <b>SASH3</b>    | NM_018990    | SAM and SH3 domain containing 3                                                   | 1.03 | 1.00E-03 |
| <b>PTPRC</b>    | NM_001267798 | protein tyrosine phosphatase, receptor type, C                                    | 1.03 | 1.94E-05 |
| <b>LY96</b>     | NM_001195797 | lymphocyte antigen 96                                                             | 1.03 | 4.19E-03 |
| <b>IL10</b>     | NM_000572    | interleukin 10                                                                    | 1.03 | 2.10E-02 |
| <b>HLA-DPA1</b> | NM_001242525 | major histocompatibility complex, class II, DP alpha 1                            | 1.03 | 1.07E-04 |
| <b>CD38</b>     | NM_001775    | CD38 molecule                                                                     | 1.03 | 7.93E-04 |
| <b>GPR65</b>    | NM_003608    | G protein-coupled receptor 65                                                     | 1.02 | 1.94E-05 |
| <b>TNFRSF1B</b> | NM_001066    | tumor necrosis factor receptor superfamily, member 1B                             | 1.02 | 2.16E-04 |
| <b>CLEC10A</b>  | NM_182906    | C-type lectin domain family 10, member A                                          | 1.02 | 1.94E-05 |
| <b>S100B</b>    | NM_006272    | S100 calcium binding protein B                                                    | 1.02 | 1.75E-02 |
| <b>IFI16</b>    | NM_005531    | interferon, gamma-inducible protein 16                                            | 1.01 | 1.33E-02 |
| <b>LCP2</b>     | NM_005565    | lymphocyte cytosolic protein 2 (SH2 domain containing leukocyte protein of 76kDa) | 1.01 | 4.53E-07 |
| <b>CD2</b>      | NM_001767    | CD2 molecule                                                                      | 1.01 | 2.30E-05 |
| <b>PSMB10</b>   | NM_002801    | proteasome (prosome, macropain) subunit, beta type, 10                            | 1.01 | 2.42E-05 |

|                 |              |                                                                                                       |      |          |
|-----------------|--------------|-------------------------------------------------------------------------------------------------------|------|----------|
| <b>SELL</b>     | NR_029467    | selectin L                                                                                            | 1.00 | 1.32E-03 |
| <b>LAIR1</b>    | NM_001289027 | leukocyte-associated immunoglobulin-like receptor 1                                                   | 1.00 | 1.87E-03 |
| <b>NCF2</b>     | NM_000433    | neutrophil cytosolic factor 2                                                                         | 1.00 | 2.66E-05 |
| <b>ITGB2</b>    | NM_001127491 | integrin, beta 2 (complement component 3 receptor 3 and 4 subunit)                                    | 1.00 | 5.27E-04 |
| <b>RNASE6</b>   | NM_005615    | ribonuclease, RNase A family, k6                                                                      | 1.00 | 7.55E-04 |
| <b>ARHGAP25</b> | NM_001007231 | Rho GTPase activating protein 25                                                                      | 1.00 | 1.36E-03 |
| <b>PLCB2</b>    | NM_001284298 | phospholipase C, beta 2                                                                               | 0.99 | 4.68E-02 |
| <b>UBE2L6</b>   | NM_004223    | ubiquitin-conjugating enzyme E2L 6                                                                    | 0.99 | 3.46E-05 |
| <b>CD3G</b>     | NM_000073    | CD3g molecule, gamma (CD3-TCR complex)                                                                | 0.99 | 4.50E-03 |
| <b>CD163</b>    | NM_004244    | CD163 molecule                                                                                        | 0.99 | 1.34E-03 |
| <b>KLRB1</b>    | NM_002258    | killer cell lectin-like receptor subfamily B, member 1                                                | 0.99 | 3.53E-05 |
| <b>SIT1</b>     | NM_014450    | signaling threshold regulating transmembrane adaptor 1                                                | 0.99 | 9.94E-03 |
| <b>CD96</b>     | NM_198196    | CD96 molecule                                                                                         | 0.99 | 1.51E-03 |
| <b>DOK2</b>     | NM_003974    | docking protein 2, 56kDa                                                                              | 0.99 | 1.07E-04 |
| <b>CCL5</b>     | NM_002985    | chemokine (C-C motif) ligand 5                                                                        | 0.99 | 6.29E-07 |
| <b>PIM2</b>     | NM_006875    | pim-2 oncogene                                                                                        | 0.98 | 5.42E-03 |
| <b>WARS</b>     | NM_213645    | tryptophanyl-tRNA synthetase                                                                          | 0.98 | 3.78E-03 |
| <b>ITGAL</b>    | NM_001114380 | integrin, alpha L (antigen CD11A (p180), lymphocyte function-associated antigen 1; alpha polypeptide) | 0.98 | 4.86E-06 |
| <b>S1PR1</b>    | NM_001400    | sphingosine-1-phosphate receptor 1                                                                    | 0.98 | 4.39E-03 |
| <b>CD180</b>    | NM_005582    | CD180 molecule                                                                                        | 0.98 | 4.25E-05 |
| <b>GPR18</b>    | NM_001098200 | G protein-coupled receptor 18                                                                         | 0.98 | 2.47E-03 |
| <b>EVI2B</b>    | NM_006495    | ecotropic viral integration site 2B                                                                   | 0.98 | 1.12E-03 |
| <b>GCNT1</b>    | NM_001490    | glucosaminyl (N-acetyl) transferase 1, core 2                                                         | 0.97 | 3.53E-05 |
| <b>CXCR4</b>    | NM_001008540 | chemokine (C-X-C motif) receptor 4                                                                    | 0.97 | 1.07E-04 |

|                |              |                                                                              |      |          |
|----------------|--------------|------------------------------------------------------------------------------|------|----------|
| <b>VAV1</b>    | NM_005428    | vav 1 guanine nucleotide exchange factor                                     | 0.97 | 3.56E-05 |
| <b>CD84</b>    | NM_003874    | CD84 molecule                                                                | 0.96 | 1.51E-03 |
| <b>MNDA</b>    | NM_002432    | myeloid cell nuclear differentiation antigen                                 | 0.96 | 6.08E-05 |
| <b>PLEK</b>    | NM_002664    | pleckstrin                                                                   | 0.96 | 8.11E-06 |
| <b>NCKAP1L</b> | NM_005337    | NCK-associated protein 1-like                                                | 0.96 | 7.06E-05 |
| <b>CHI3L2</b>  | NM_001025197 | chitinase 3-like 2                                                           | 0.95 | 2.38E-02 |
| <b>ENTPD1</b>  | NM_001164178 | ectonucleoside triphosphate diphosphohydrolase 1                             | 0.95 | 1.75E-02 |
| <b>CLIC2</b>   | NM_001289    | chloride intracellular channel 2                                             | 0.95 | 1.21E-04 |
| <b>GZMA</b>    | NM_006144    | granzyme A (granzyme 1, cytotoxic T-lymphocyte-associated serine esterase 3) | 0.94 | 8.72E-05 |
| <b>MAP3K8</b>  | NM_001244134 | mitogen-activated protein kinase kinase kinase 8                             | 0.94 | 4.36E-05 |
| <b>LAPTM5</b>  | NM_006762    | lysosomal protein transmembrane 5                                            | 0.94 | 2.26E-05 |
| <b>CD3E</b>    | NM_000733    | CD3e molecule, epsilon (CD3-TCR complex)                                     | 0.94 | 8.89E-05 |
| <b>PTPN6</b>   | NM_080549    | protein tyrosine phosphatase, non-receptor type 6                            | 0.94 | 3.20E-02 |
| <b>TARP</b>    | NM_001003799 | TCR gamma alternate reading frame protein                                    | 0.94 | 1.94E-04 |
| <b>CXCL13</b>  | NM_006419    | chemokine (C-X-C motif) ligand 13                                            | 0.94 | 6.05E-03 |
| <b>APOL1</b>   | NM_001136541 | apolipoprotein L, 1                                                          | 0.93 | 1.79E-04 |
| <b>DOCK2</b>   | NM_004946    | dedicator of cytokinesis 2                                                   | 0.93 | 1.21E-02 |
| <b>PNO</b>     | NM_001284244 | prepronociceptin                                                             | 0.93 | 3.71E-02 |
| <b>C3AR1</b>   | NM_004054    | complement component 3a receptor 1                                           | 0.93 | 1.07E-04 |
| <b>HLA-F</b>   | NM_001098478 | major histocompatibility complex, class I, F                                 | 0.93 | 4.25E-06 |
| <b>MSR1</b>    | NM_138715    | macrophage scavenger receptor 1                                              | 0.93 | 1.82E-03 |
| <b>FASLG</b>   | NM_000639    | Fas ligand (TNF superfamily, member 6)                                       | 0.93 | 1.23E-04 |
| <b>IL18RAP</b> | NM_003853    | interleukin 18 receptor accessory protein                                    | 0.93 | 1.16E-04 |
| <b>PSMB8</b>   | NM_148919    | proteasome (prosome, macropain) subunit, beta type, 8                        | 0.93 | 1.02E-02 |
| <b>CST7</b>    | NM_003650    | cystatin F (leukocystatin)                                                   | 0.92 | 1.21E-04 |

|               |              |                                                                                          |      |          |
|---------------|--------------|------------------------------------------------------------------------------------------|------|----------|
| <b>CD1D</b>   | NM_001766    | CD1d molecule                                                                            | 0.92 | 6.72E-04 |
| <b>LILRB2</b> | NM_005874    | leukocyte immunoglobulin-like receptor, subfamily B (with TM and ITIM domains), member 2 | 0.92 | 2.59E-03 |
| <b>PTPN7</b>  | NM_002832    | protein tyrosine phosphatase, non-receptor type 7                                        | 0.92 | 5.45E-03 |
| <b>RTN1</b>   | NM_206852    | reticulon 1                                                                              | 0.92 | 2.07E-05 |
| <b>VSIG4</b>  | NM_007268    | V-set and immunoglobulin domain containing 4                                             | 0.92 | 1.40E-04 |
| <b>STK17B</b> | NM_004226    | serine/threonine kinase 17b                                                              | 0.91 | 3.24E-03 |
| <b>IL15RA</b> | NM_002189    | interleukin 15 receptor, alpha                                                           | 0.91 | 1.30E-04 |
| <b>ADA</b>    | NM_000022    | adenosine deaminase                                                                      | 0.91 | 5.45E-03 |
| <b>SLC1A3</b> | NM_001289939 | solute carrier family 1 (glial high affinity glutamate transporter), member 3            | 0.91 | 2.02E-02 |
| <b>CHN1</b>   | NM_001025201 | chimerin 1                                                                               | 0.91 | 4.88E-02 |
| <b>STAT1</b>  | NM_139266    | signal transducer and activator of transcription 1, 91kDa                                | 0.91 | 2.08E-07 |
| <b>NLRP3</b>  | NM_004895    | NLR family, pyrin domain containing 3                                                    | 0.91 | 2.53E-02 |
| <b>TRAF1</b>  | NM_005658    | TNF receptor-associated factor 1                                                         | 0.91 | 1.82E-02 |
| <b>SH2B3</b>  | NM_001291424 | SH2B adaptor protein 3                                                                   | 0.91 | 1.50E-04 |
| <b>C1QB</b>   | NM_000491    | complement component 1, q subcomponent, B chain                                          | 0.91 | 2.91E-04 |
| <b>SH2D2A</b> | NM_001161442 | SH2 domain containing 2A                                                                 | 0.91 | 1.10E-03 |
| <b>EMP3</b>   | NM_001425    | epithelial membrane protein 3                                                            | 0.91 | 1.60E-04 |
| <b>VOPP1</b>  | NM_001284284 | vesicular, overexpressed in cancer, prosurvival protein 1                                | 0.91 | 1.93E-03 |
| <b>SLC2A3</b> | NM_006931    | solute carrier family 2 (facilitated glucose transporter), member 3                      | 0.90 | 7.96E-04 |
| <b>P2RY10</b> | NM_198333    | purinergic receptor P2Y, G-protein coupled, 10                                           | 0.90 | 9.57E-05 |
| <b>PZP</b>    | NM_002864    | pregnancy-zone protein                                                                   | 0.90 | 1.58E-02 |

|                 |              |                                                                                |      |          |
|-----------------|--------------|--------------------------------------------------------------------------------|------|----------|
| <b>PTPRE</b>    | NM_006504    | protein tyrosine phosphatase, receptor type, E                                 | 0.90 | 6.59E-04 |
| <b>PTPRCAP</b>  | NM_005608    | protein tyrosine phosphatase, receptor type, C-associated protein              | 0.90 | 7.96E-04 |
| <b>SECTM1</b>   | NM_003004    | secreted and transmembrane 1                                                   | 0.90 | 1.73E-04 |
| <b>STK10</b>    | NM_005990    | serine/threonine kinase 10                                                     | 0.90 | 4.41E-04 |
| <b>CRLF3</b>    | NM_015986    | cytokine receptor-like factor 3                                                | 0.90 | 4.54E-03 |
| <b>CD37</b>     | NM_001774    | CD37 molecule                                                                  | 0.90 | 1.91E-04 |
| <b>ADAMDEC1</b> | NM_014479    | ADAM-like, decysin 1                                                           | 0.89 | 6.34E-03 |
| <b>CD14</b>     | NM_001174104 | CD14 molecule                                                                  | 0.89 | 4.50E-03 |
| <b>RAB27A</b>   | NM_183235    | RAB27A, member RAS oncogene family                                             | 0.89 | 1.22E-04 |
| <b>APOBEC3F</b> | NM_001006666 | apolipoprotein B mRNA editing enzyme, catalytic polypeptide-like 3F            | 0.89 | 1.27E-02 |
| <b>BTN3A1</b>   | NM_001145008 | butyrophilin, subfamily 3, member A1                                           | 0.89 | 3.78E-05 |
| <b>MFNG</b>     | NM_001166343 | MFNG O-fucosylpeptide 3-beta-N-acetylglucosaminyltransferase                   | 0.89 | 1.74E-02 |
| <b>PLEKHO2</b>  | NM_025201    | pleckstrin homology domain containing, family O member 2                       | 0.88 | 6.08E-03 |
| <b>LYN</b>      | NM_001111097 | v-yes-1 Yamaguchi sarcoma viral related oncogene homolog                       | 0.88 | 7.09E-06 |
| <b>MYB</b>      | NM_001161658 | v-myb avian myeloblastosis viral oncogene homolog                              | 0.88 | 5.80E-03 |
| <b>POU2AF1</b>  | NM_006235    | POU class 2 associating factor 1                                               | 0.88 | 4.07E-03 |
| <b>VNN2</b>     | NR_034173    | vanin 2                                                                        | 0.88 | 2.15E-02 |
| <b>CD27</b>     | NM_001242    | CD27 molecule                                                                  | 0.88 | 2.52E-04 |
| <b>HLA-E</b>    | NM_005516    | major histocompatibility complex, class I, E                                   | 0.88 | 1.27E-03 |
| <b>IFI30</b>    | NM_006332    | interferon, gamma-inducible protein 30                                         | 0.88 | 1.91E-03 |
| <b>CFP</b>      | NM_001145252 | complement factor properdin                                                    | 0.88 | 2.80E-03 |
| <b>LILRA1</b>   | NR_103503    | leukocyte immunoglobulin-like receptor, subfamily A (with TM domain), member 1 | 0.88 | 1.69E-03 |
| <b>LYZ</b>      | NM_000239    | lysozyme                                                                       | 0.88 | 5.16E-05 |

|                 |              |                                                                     |      |          |
|-----------------|--------------|---------------------------------------------------------------------|------|----------|
| <b>MAP4K1</b>   | NM_007181    | mitogen-activated protein kinase kinase kinase kinase 1             | 0.87 | 2.27E-03 |
| <b>FYB</b>      | NM_001465    | FYN binding protein                                                 | 0.87 | 3.05E-04 |
| <b>APOBEC3G</b> | NM_021822    | apolipoprotein B mRNA editing enzyme, catalytic polypeptide-like 3G | 0.87 | 3.81E-03 |
| <b>TRIM22</b>   | NM_001199573 | tripartite motif containing 22                                      | 0.87 | 1.91E-04 |
| <b>CXCR6</b>    | NM_006564    | chemokine (C-X-C motif) receptor 6                                  | 0.87 | 8.26E-05 |
| <b>FCGR2A</b>   | NM_021642    | Fc fragment of IgG, low affinity IIa, receptor (CD32)               | 0.87 | 1.73E-03 |
| <b>GAS7</b>     | NM_201433    | growth arrest-specific 7                                            | 0.87 | 2.93E-03 |
| <b>TLR2</b>     | NM_003264    | toll-like receptor 2                                                | 0.87 | 2.98E-04 |
| <b>STX11</b>    | NM_003764    | syntaxin 11                                                         | 0.87 | 3.60E-03 |
| <b>PTPN22</b>   | NM_001193431 | protein tyrosine phosphatase, non-receptor type 22 (lymphoid)       | 0.87 | 1.45E-05 |
| <b>MS4A1</b>    | NM_021950    | membrane-spanning 4-domains, subfamily A, member 1                  | 0.86 | 8.79E-03 |
| <b>SLAMF1</b>   | NR_104399    | signaling lymphocytic activation molecule family member 1           | 0.86 | 3.42E-03 |
| <b>HAS2</b>     | NM_005328    | hyaluronan synthase 2                                               | 0.86 | 1.00E-02 |
| <b>DUSP2</b>    | NM_004418    | dual specificity phosphatase 2                                      | 0.86 | 1.66E-02 |
| <b>FPR2</b>     | NM_001462    | formyl peptide receptor 2                                           | 0.86 | 8.97E-03 |
| <b>SELPLG</b>   | NM_001206609 | selectin P ligand                                                   | 0.86 | 1.32E-03 |
| <b>DUSP4</b>    | NM_057158    | dual specificity phosphatase 4                                      | 0.86 | 1.10E-03 |
| <b>PMP22</b>    | NR_104017    | peripheral myelin protein 22                                        | 0.86 | 4.16E-04 |
| <b>HMHA1</b>    | NM_001282334 | histocompatibility (minor) HA-1                                     | 0.86 | 3.92E-04 |
| <b>JAK3</b>     | NM_000215    | Janus kinase 3                                                      | 0.86 | 1.58E-02 |
| <b>CLEC2B</b>   | NM_005127    | C-type lectin domain family 2, member B                             | 0.86 | 8.26E-05 |
| <b>EMR1</b>     | NM_001256253 | egf-like module containing, mucin-like, hormone receptor-like 1     | 0.85 | 3.06E-02 |
| <b>FPR1</b>     | NM_001193306 | formyl peptide receptor 1                                           | 0.85 | 4.83E-04 |

|                 |              |                                                                                                      |      |          |
|-----------------|--------------|------------------------------------------------------------------------------------------------------|------|----------|
| <b>LAMP3</b>    | NM_014398    | lysosomal-associated membrane protein 3                                                              | 0.85 | 4.37E-04 |
| <b>BTN3A2</b>   | NM_007047    | butyrophilin, subfamily 3, member A2                                                                 | 0.85 | 1.27E-05 |
| <b>LAIR2</b>    | NM_021270    | leukocyte-associated immunoglobulin-like receptor 2                                                  | 0.85 | 4.41E-04 |
| <b>MICB</b>     | NM_005931    | MHC class I polypeptide-related sequence B                                                           | 0.85 | 3.98E-04 |
| <b>LMNB1</b>    | NM_001198557 | lamin B1                                                                                             | 0.85 | 1.26E-03 |
| <b>GNA15</b>    | NM_002068    | guanine nucleotide binding protein (G protein), alpha 15 (Gq class)                                  | 0.84 | 4.91E-04 |
| <b>CTSW</b>     | NM_001335    | cathepsin W                                                                                          | 0.84 | 4.83E-04 |
| <b>GZMK</b>     | NM_002104    | granzyme K (granzyme 3; tryptase II)                                                                 | 0.84 | 7.87E-04 |
| <b>FPR3</b>     | NM_002030    | formyl peptide receptor 3                                                                            | 0.84 | 7.93E-04 |
| <b>KIAA0101</b> | NR_109934    | KIAA0101                                                                                             | 0.84 | 3.14E-02 |
| <b>PRKCH</b>    | NM_006255    | protein kinase C, eta                                                                                | 0.84 | 7.74E-04 |
| <b>NCF4</b>     | NM_000631    | neutrophil cytosolic factor 4, 40kDa                                                                 | 0.83 | 8.26E-05 |
| <b>IL7R</b>     | NR_120485    | interleukin 7 receptor                                                                               | 0.83 | 1.01E-04 |
| <b>KCNJ2</b>    | NM_000891    | potassium inwardly-rectifying channel, subfamily J, member 2                                         | 0.83 | 3.81E-03 |
| <b>ALOX5</b>    | NM_001256153 | arachidonate 5-lipoxygenase                                                                          | 0.83 | 7.17E-03 |
| <b>NELL2</b>    | NM_001145110 | NEL-like 2 (chicken)                                                                                 | 0.83 | 2.80E-03 |
| <b>CAMK4</b>    | NM_001744    | calcium/calmodulin-dependent protein kinase IV                                                       | 0.83 | 1.43E-02 |
| <b>TAP2</b>     | NM_000544    | transporter 2, ATP-binding cassette, subfamily B (MDR/TAP)                                           | 0.83 | 2.48E-05 |
| <b>DLGAP5</b>   | NM_014750    | discs, large (Drosophila) homolog-associated protein 5                                               | 0.83 | 1.54E-02 |
| <b>MTHFD2</b>   | NM_006636    | methylenetetrahydrofolate dehydrogenase (NADP+ dependent) 2, methenyltetrahydrofolate cyclohydrolase | 0.83 | 1.50E-02 |
| <b>TGFBI</b>    | NM_000358    | transforming growth factor, beta-induced, 68kDa                                                      | 0.83 | 6.72E-04 |
| <b>GPR183</b>   | NM_004951    | G protein-coupled receptor 183                                                                       | 0.82 | 6.72E-04 |

|                |              |                                                            |      |          |
|----------------|--------------|------------------------------------------------------------|------|----------|
| <b>MKI67</b>   | NM_002417    | marker of proliferation Ki-67                              | 0.82 | 5.45E-03 |
| <b>P2RY14</b>  | NM_001081455 | purinergic receptor P2Y, G-protein coupled, 14             | 0.82 | 9.47E-03 |
| <b>ETS1</b>    | NM_001143820 | v-ets avian erythroblastosis virus E26 oncogene homolog 1  | 0.82 | 2.26E-02 |
| <b>HHEX</b>    | NM_002729    | hematopoietically expressed homeobox                       | 0.81 | 1.79E-04 |
| <b>CD40LG</b>  | NM_000074    | CD40 ligand                                                | 0.81 | 2.32E-02 |
| <b>TXK</b>     | NM_003328    | TXK tyrosine kinase                                        | 0.81 | 2.76E-03 |
| <b>IL12RB1</b> | NM_005535    | interleukin 12 receptor, beta 1                            | 0.81 | 8.99E-03 |
| <b>BTN3A3</b>  | NM_197974    | butyrophilin, subfamily 3, member A3                       | 0.81 | 1.79E-04 |
| <b>HSPA6</b>   | NM_002155    | heat shock 70kDa protein 6 (HSP70B')                       | 0.81 | 1.51E-04 |
| <b>TNFSF8</b>  | NM_001252290 | tumor necrosis factor (ligand) superfamily, member 8       | 0.81 | 2.52E-04 |
| <b>MX2</b>     | NM_002463    | myxovirus (influenza virus) resistance 2 (mouse)           | 0.80 | 9.37E-04 |
| <b>CD4</b>     | NM_000616    | CD4 molecule                                               | 0.80 | 5.81E-04 |
| <b>CCL13</b>   | NM_005408    | chemokine (C-C motif) ligand 13                            | 0.80 | 3.81E-03 |
| <b>BCAT1</b>   | NM_001178093 | branched chain amino-acid transaminase 1, cytosolic        | 0.80 | 6.70E-03 |
| <b>FAIM3</b>   | NM_001193338 | Fas apoptotic inhibitory molecule 3                        | 0.80 | 1.79E-04 |
| <b>CASP5</b>   | NM_001136109 | caspase 5, apoptosis-related cysteine peptidase            | 0.80 | 1.00E-03 |
| <b>LY9</b>     | NM_001261456 | lymphocyte antigen 9                                       | 0.80 | 8.26E-05 |
| <b>IL10RB</b>  | NM_000628    | interleukin 10 receptor, beta                              | 0.80 | 7.55E-04 |
| <b>CD97</b>    | NM_001784    | CD97 molecule                                              | 0.80 | 1.02E-03 |
| <b>WAS</b>     | NM_000377    | Wiskott-Aldrich syndrome                                   | 0.80 | 2.59E-03 |
| <b>CCR2</b>    | NM_001123041 | chemokine (C-C motif) receptor 2                           | 0.80 | 1.48E-04 |
| <b>MOXD1</b>   | NM_015529    | monooxygenase, DBH-like 1                                  | 0.79 | 2.53E-02 |
| <b>PTAFR</b>   | NM_000952    | platelet-activating factor receptor                        | 0.79 | 3.28E-03 |
| <b>PSTPIP1</b> | NM_003978    | proline-serine-threonine phosphatase interacting protein 1 | 0.79 | 2.78E-02 |

|                |              |                                                                                          |      |          |
|----------------|--------------|------------------------------------------------------------------------------------------|------|----------|
| <b>ST3GAL5</b> | NM_001042437 | ST3 beta-galactoside alpha-2,3-sialyltransferase 5                                       | 0.79 | 2.85E-03 |
| <b>INPP5D</b>  | NM_005541    | inositol polyphosphate-5-phosphatase, 145kDa                                             | 0.79 | 1.73E-03 |
| <b>CAV1</b>    | NM_001172896 | caveolin 1, caveolae protein, 22kDa                                                      | 0.79 | 7.84E-04 |
| <b>SH2D1A</b>  | NM_002351    | SH2 domain containing 1A                                                                 | 0.79 | 6.14E-03 |
| <b>CD300A</b>  | NM_007261    | CD300a molecule                                                                          | 0.79 | 5.95E-03 |
| <b>TCIRG1</b>  | NM_006019    | T-cell, immune regulator 1, ATPase, H <sup>+</sup> transporting, lysosomal V0 subunit A3 | 0.79 | 1.26E-03 |
| <b>HCP5</b>    | NR_040662    | HLA complex P5 (non-protein coding)                                                      | 0.79 | 1.26E-03 |
| <b>DNMT1</b>   | NM_001130823 | DNA (cytosine-5-)-methyltransferase 1                                                    | 0.78 | 1.31E-03 |
| <b>LPXN</b>    | NM_001143995 | leupaxin                                                                                 | 0.78 | 3.07E-04 |
| <b>NDC80</b>   | NM_006101    | NDC80 kinetochore complex component                                                      | 0.78 | 2.18E-03 |
| <b>CDH13</b>   | NM_001220491 | cadherin 13                                                                              | 0.78 | 2.93E-03 |
| <b>ARHGDI2</b> | NM_001175    | Rho GDP dissociation inhibitor (GDI) beta                                                | 0.78 | 5.83E-04 |
| <b>BAZ1A</b>   | NM_182648    | bromodomain adjacent to zinc finger domain, 1A                                           | 0.78 | 1.03E-02 |
| <b>OLFML2B</b> | NM_015441    | olfactomedin-like 2B                                                                     | 0.78 | 1.22E-02 |
| <b>CFD</b>     | NM_001928    | complement factor D (adipsin)                                                            | 0.78 | 1.82E-02 |
| <b>CD101</b>   | NM_001256111 | CD101 molecule                                                                           | 0.77 | 4.68E-03 |
| <b>HLA-DOA</b> | NM_002119    | major histocompatibility complex, class II, DO alpha                                     | 0.77 | 3.28E-03 |
| <b>LCK</b>     | NM_005356    | lymphocyte-specific protein tyrosine kinase                                              | 0.77 | 3.26E-03 |
| <b>CLC</b>     | NM_001828    | Charcot-Leyden crystal galectin                                                          | 0.77 | 1.64E-03 |
| <b>ADRB2</b>   | NM_000024    | adrenoceptor beta 2, surface                                                             | 0.77 | 1.20E-02 |
| <b>TMSB10</b>  | NM_021103    | thymosin beta 10                                                                         | 0.77 | 3.21E-03 |
| <b>IL4R</b>    | NM_001257407 | interleukin 4 receptor                                                                   | 0.77 | 1.08E-02 |
| <b>HLA-DOB</b> | NM_002120    | major histocompatibility complex, class II, DO beta                                      | 0.77 | 1.28E-03 |
| <b>CD33</b>    | NM_001772    | CD33 molecule                                                                            | 0.77 | 1.71E-03 |

|                |              |                                                                        |      |          |
|----------------|--------------|------------------------------------------------------------------------|------|----------|
| <b>CCR1</b>    | NM_001295    | chemokine (C-C motif) receptor 1                                       | 0.77 | 2.26E-02 |
| <b>IRF4</b>    | NM_001195286 | interferon regulatory factor 4                                         | 0.76 | 6.05E-03 |
| <b>RUNX3</b>   | NM_001031680 | runt-related transcription factor 3                                    | 0.76 | 9.34E-03 |
| <b>CD247</b>   | NM_198053    | CD247 molecule                                                         | 0.76 | 9.86E-04 |
| <b>BCL11A</b>  | NM_022893    | B-cell CLL/lymphoma 11A (zinc finger protein)                          | 0.76 | 4.02E-02 |
| <b>SIRPB1</b>  | NM_001135844 | signal-regulatory protein beta 1                                       | 0.75 | 1.91E-02 |
| <b>ALOX5AP</b> | NM_001629    | arachidonate 5-lipoxygenase-activating protein                         | 0.75 | 2.11E-03 |
| <b>CCND3</b>   | NM_001287434 | cyclin D3                                                              | 0.75 | 5.17E-04 |
| <b>IL17RA</b>  | NM_014339    | interleukin 17 receptor A                                              | 0.75 | 4.37E-02 |
| <b>CYBB</b>    | NM_000397    | cytochrome b-245, beta polypeptide                                     | 0.75 | 1.73E-04 |
| <b>IKZF1</b>   | NM_001291838 | IKAROS family zinc finger 1 (Ikaros)                                   | 0.75 | 4.91E-04 |
| <b>KLF4</b>    | NM_004235    | Kruppel-like factor 4 (gut)                                            | 0.75 | 6.72E-04 |
| <b>LSP1</b>    | NM_001242932 | lymphocyte-specific protein 1                                          | 0.75 | 1.79E-03 |
| <b>CD19</b>    | NM_001770    | CD19 molecule                                                          | 0.74 | 2.28E-02 |
| <b>CD40</b>    | NM_152854    | CD40 molecule, TNF receptor superfamily member 5                       | 0.74 | 1.07E-04 |
| <b>KIF21B</b>  | NM_001252102 | kinesin family member 21B                                              | 0.74 | 6.34E-03 |
| <b>NR4A2</b>   | NM_006186    | nuclear receptor subfamily 4, group A, member 2                        | 0.74 | 2.32E-04 |
| <b>LHFPL2</b>  | NM_005779    | lipoma HMGIC fusion partner-like 2                                     | 0.74 | 1.20E-02 |
| <b>ITGAM</b>   | NM_001145808 | integrin, alpha M (complement component 3 receptor 3 subunit)          | 0.74 | 2.22E-03 |
| <b>OAS2</b>    | NM_016817    | 2'-5'-oligoadenylate synthetase 2, 69/71kDa                            | 0.74 | 2.48E-04 |
| <b>B2M</b>     | NM_004048    | beta-2-microglobulin                                                   | 0.74 | 2.43E-04 |
| <b>RARRES3</b> | NM_004585    | retinoic acid receptor responder (tazarotene induced) 3                | 0.73 | 2.76E-03 |
| <b>RNASE2</b>  | NM_002934    | ribonuclease, RNase A family, 2 (liver, eosinophil-derived neurotoxin) | 0.73 | 3.20E-03 |

|                 |              |                                                                               |      |          |
|-----------------|--------------|-------------------------------------------------------------------------------|------|----------|
| <b>APOBEC3C</b> | NM_014508    | apolipoprotein B mRNA editing enzyme, catalytic polypeptide-like 3C           | 0.73 | 2.45E-03 |
| <b>AIF1</b>     | NM_032955    | allograft inflammatory factor 1                                               | 0.73 | 7.96E-05 |
| <b>CMKLR1</b>   | NM_001142344 | chemokine-like receptor 1                                                     | 0.73 | 1.32E-03 |
| <b>ARHGAP4</b>  | NM_001666    | Rho GTPase activating protein 4                                               | 0.73 | 2.93E-03 |
| <b>DOCK10</b>   | NM_001290263 | dedicator of cytokinesis 10                                                   | 0.73 | 2.18E-03 |
| <b>TRAF5</b>    | NM_001033910 | TNF receptor-associated factor 5                                              | 0.72 | 2.72E-03 |
| <b>IKBKE</b>    | NM_014002    | inhibitor of kappa light polypeptide gene enhancer in B-cells, kinase epsilon | 0.72 | 2.32E-02 |
| <b>CDC25B</b>   | NM_001287516 | cell division cycle 25B                                                       | 0.72 | 3.36E-03 |
| <b>GZMH</b>     | NM_001270781 | granzyme H (cathepsin G-like 2, protein h-CCPX)                               | 0.72 | 3.31E-03 |
| <b>NR4A3</b>    | NM_173200    | nuclear receptor subfamily 4, group A, member 3                               | 0.72 | 1.77E-02 |
| <b>KLRG1</b>    | NM_005810    | killer cell lectin-like receptor subfamily G, member 1                        | 0.72 | 4.61E-03 |
| <b>PSME2</b>    | NM_002818    | proteasome (prosome, macropain) activator subunit 2 (PA28 beta)               | 0.72 | 3.02E-03 |
| <b>FLI1</b>     | NM_001167681 | Fli-1 proto-oncogene, ETS transcription factor                                | 0.71 | 1.32E-03 |
| <b>CYTH1</b>    | NM_001292018 | cytohesin 1                                                                   | 0.71 | 2.73E-02 |
| <b>TBXAS1</b>   | NM_001130966 | thromboxane A synthase 1 (platelet)                                           | 0.71 | 5.72E-03 |
| <b>ARL4C</b>    | NM_005737    | ADP-ribosylation factor-like 4C                                               | 0.71 | 2.04E-02 |
| <b>C1R</b>      | NM_001733    | complement component 1, r subcomponent                                        | 0.71 | 4.09E-03 |
| <b>KIAA0922</b> | NM_001131007 | KIAA0922                                                                      | 0.70 | 1.36E-03 |
| <b>DOK1</b>     | NM_001197260 | docking protein 1, 62kDa (downstream of tyrosine kinase 1)                    | 0.70 | 2.24E-02 |
| <b>CD44</b>     | NM_001202555 | CD44 molecule (Indian blood group)                                            | 0.70 | 4.41E-04 |
| <b>IFITM1</b>   | NM_003641    | interferon induced transmembrane protein 1                                    | 0.70 | 3.28E-03 |
| <b>SERPINB9</b> | NM_004155    | serpin peptidase inhibitor, clade B (ovalbumin), member 9                     | 0.70 | 7.84E-04 |
| <b>DUSP5</b>    | NM_004419    | dual specificity phosphatase 5                                                | 0.69 | 5.15E-03 |

|                 |              |                                                                                           |      |          |
|-----------------|--------------|-------------------------------------------------------------------------------------------|------|----------|
| <b>ICAM1</b>    | NM_000201    | intercellular adhesion molecule 1                                                         | 0.69 | 7.55E-04 |
| <b>IGJ</b>      | NM_144646    | immunoglobulin J polypeptide, linker protein for immunoglobulin alpha and mu polypeptides | 0.69 | 1.55E-02 |
| <b>TGM2</b>     | NM_004613    | transglutaminase 2                                                                        | 0.69 | 3.97E-03 |
| <b>FMNL1</b>    | NM_005892    | formin-like 1                                                                             | 0.69 | 3.76E-02 |
| <b>BID</b>      | NM_001244569 | BH3 interacting domain death agonist                                                      | 0.69 | 6.72E-04 |
| <b>TNFAIP8</b>  | NM_001286815 | tumor necrosis factor, alpha-induced protein 8                                            | 0.69 | 5.56E-03 |
| <b>RAB31</b>    | NM_006868    | RAB31, member RAS oncogene family                                                         | 0.69 | 7.74E-04 |
| <b>ADCY7</b>    | NM_001286057 | adenylate cyclase 7                                                                       | 0.69 | 1.96E-03 |
| <b>CASP4</b>    | NM_001225    | caspase 4, apoptosis-related cysteine peptidase                                           | 0.69 | 1.89E-03 |
| <b>PECAM1</b>   | NM_000442    | platelet/endothelial cell adhesion molecule 1                                             | 0.68 | 2.98E-04 |
| <b>TDO2</b>     | NM_005651    | tryptophan 2,3-dioxygenase                                                                | 0.68 | 2.68E-02 |
| <b>CD79A</b>    | NM_021601    | CD79a molecule, immunoglobulin-associated alpha                                           | 0.68 | 2.01E-03 |
| <b>FCGR2B</b>   | NM_004001    | Fc fragment of IgG, low affinity IIb, receptor (CD32)                                     | 0.68 | 5.21E-03 |
| <b>PIK3CD</b>   | NM_005026    | phosphatidylinositol-4,5-bisphosphate 3-kinase, catalytic subunit delta                   | 0.68 | 6.85E-03 |
| <b>VCAN</b>     | NM_001164097 | versican                                                                                  | 0.68 | 5.27E-04 |
| <b>ABCC1</b>    | NM_004996    | ATP-binding cassette, sub-family C (CFTR/MRP), member 1                                   | 0.68 | 1.71E-03 |
| <b>CD226</b>    | NM_006566    | CD226 molecule                                                                            | 0.68 | 6.24E-03 |
| <b>SERPINB8</b> | NM_001031848 | serpin peptidase inhibitor, clade B (ovalbumin), member 8                                 | 0.68 | 3.38E-02 |
| <b>C2</b>       | NM_000063    | complement component 2                                                                    | 0.67 | 1.49E-03 |
| <b>BATF</b>     | NM_006399    | basic leucine zipper transcription factor, ATF-like                                       | 0.67 | 1.00E-02 |
| <b>SACS</b>     | NM_014363    | saesin molecular chaperone                                                                | 0.67 | 2.94E-02 |
| <b>DGKA</b>     | NM_201445    | diacylglycerol kinase, alpha 80kDa                                                        | 0.67 | 2.28E-03 |

|                 |              |                                                         |      |          |
|-----------------|--------------|---------------------------------------------------------|------|----------|
| <b>CCL11</b>    | NM_002986    | chemokine (C-C motif) ligand 11                         | 0.67 | 6.44E-03 |
| <b>CCNA2</b>    | NM_001237    | cyclin A2                                               | 0.67 | 2.11E-03 |
| <b>PRDM1</b>    | NM_182907    | PR domain containing 1, with ZNF domain                 | 0.67 | 1.22E-03 |
| <b>RGS19</b>    | NM_001039467 | regulator of G-protein signaling 19                     | 0.67 | 7.30E-03 |
| <b>LAG3</b>     | NM_002286    | lymphocyte-activation gene 3                            | 0.66 | 3.92E-02 |
| <b>UCP2</b>     | NM_003355    | uncoupling protein 2 (mitochondrial, proton carrier)    | 0.66 | 2.76E-03 |
| <b>FBN1</b>     | NM_000138    | fibrillin 1                                             | 0.66 | 1.28E-03 |
| <b>TOP2A</b>    | NM_001067    | topoisomerase (DNA) II alpha 170kDa                     | 0.66 | 4.61E-03 |
| <b>ARHGEF6</b>  | NM_004840    | Rac/Cdc42 guanine nucleotide exchange factor (GEF) 6    | 0.66 | 8.10E-03 |
| <b>DENND3</b>   | NM_014957    | DENN/MADD domain containing 3                           | 0.66 | 2.45E-03 |
| <b>KIAA0125</b> | NR_026800    | KIAA0125                                                | 0.66 | 2.07E-02 |
| <b>ITM2A</b>    | NM_001171581 | integral membrane protein 2A                            | 0.66 | 3.20E-03 |
| <b>NMI</b>      | NM_004688    | N-myc (and STAT) interactor                             | 0.66 | 8.81E-03 |
| <b>S100A8</b>   | NM_002964    | S100 calcium binding protein A8                         | 0.66 | 3.38E-02 |
| <b>ELMO1</b>    | NM_001039459 | engulfment and cell motility 1                          | 0.66 | 8.73E-03 |
| <b>MARCKS</b>   | NM_002356    | myristoylated alanine-rich protein kinase C substrate   | 0.65 | 4.76E-04 |
| <b>RHOG</b>     | NM_001665    | ras homolog family member G                             | 0.65 | 8.81E-03 |
| <b>RARRES1</b>  | NM_206963    | retinoic acid receptor responder (tazarotene induced) 1 | 0.65 | 7.96E-04 |
| <b>CD160</b>    | NM_007053    | CD160 molecule                                          | 0.65 | 3.62E-02 |
| <b>CD1C</b>     | NM_001765    | CD1c molecule                                           | 0.65 | 9.75E-03 |
| <b>SP110</b>    | NM_004509    | SP110 nuclear body protein                              | 0.65 | 1.10E-02 |
| <b>MYD88</b>    | NM_001172566 | myeloid differentiation primary response 88             | 0.64 | 1.00E-02 |
| <b>UBA7</b>     | NM_003335    | ubiquitin-like modifier activating enzyme 7             | 0.64 | 3.81E-03 |
| <b>IL15</b>     | NR_037840    | interleukin 15                                          | 0.64 | 6.34E-03 |
| <b>TNFRSF17</b> | NM_001192    | tumor necrosis factor receptor superfamily, member 17   | 0.64 | 1.08E-02 |

|                 |              |                                                                                               |      |          |
|-----------------|--------------|-----------------------------------------------------------------------------------------------|------|----------|
| <b>TBC1D2B</b>  | NM_144572    | TBC1 domain family, member 2B                                                                 | 0.64 | 3.41E-02 |
| <b>EZH2</b>     | NM_001203248 | enhancer of zeste 2 polycomb repressive complex 2 subunit                                     | 0.64 | 1.04E-02 |
| <b>AQP9</b>     | NM_020980    | aquaporin 9                                                                                   | 0.64 | 3.04E-02 |
| <b>IRAK3</b>    | NM_001142523 | interleukin-1 receptor-associated kinase 3                                                    | 0.64 | 2.15E-03 |
| <b>GFI1</b>     | NM_001127216 | growth factor independent 1 transcription repressor                                           | 0.64 | 1.09E-02 |
| <b>CD6</b>      | NR_045638    | CD6 molecule                                                                                  | 0.64 | 1.69E-02 |
| <b>SERPINE1</b> | NM_000602    | serpin peptidase inhibitor, clade E (nexin, plasminogen activator inhibitor type 1), member 1 | 0.64 | 1.96E-03 |
| <b>ARHGEF1</b>  | NM_198977    | Rho guanine nucleotide exchange factor (GEF) 1                                                | 0.63 | 7.22E-03 |
| <b>PTGER2</b>   | NM_000956    | prostaglandin E receptor 2 (subtype EP2), 53kDa                                               | 0.63 | 1.16E-02 |
| <b>IFNAR2</b>   | NM_207585    | interferon (alpha, beta and omega) receptor 2                                                 | 0.63 | 2.23E-03 |
| <b>MAN2B1</b>   | NM_000528    | mannosidase, alpha, class 2B, member 1                                                        | 0.63 | 1.14E-02 |
| <b>PTHLH</b>    | NM_198964    | parathyroid hormone-like hormone                                                              | 0.63 | 8.27E-03 |
| <b>ZAP70</b>    | NM_001079    | zeta-chain (TCR) associated protein kinase 70kDa                                              | 0.63 | 4.68E-03 |
| <b>OASL</b>     | NM_001261825 | 2'-5'-oligoadenylate synthetase-like                                                          | 0.63 | 4.16E-03 |
| <b>S1PR4</b>    | NM_003775    | sphingosine-1-phosphate receptor 4                                                            | 0.63 | 4.28E-02 |
| <b>PDE4B</b>    | NM_001037340 | phosphodiesterase 4B, cAMP-specific                                                           | 0.63 | 3.59E-03 |
| <b>CCRL2</b>    | NM_003965    | chemokine (C-C motif) receptor-like 2                                                         | 0.63 | 9.99E-03 |
| <b>NFKBIA</b>   | NM_020529    | nuclear factor of kappa light polypeptide gene enhancer in B-cells inhibitor, alpha           | 0.63 | 1.21E-02 |
| <b>PLAUR</b>    | NM_001005376 | plasminogen activator, urokinase receptor                                                     | 0.63 | 2.23E-03 |
| <b>TRAF3IP3</b> | NR_109871    | TRAF3 interacting protein 3                                                                   | 0.62 | 5.94E-03 |
| <b>ADORA3</b>   | NM_000677    | adenosine A3 receptor                                                                         | 0.62 | 5.57E-03 |
| <b>TCF7</b>     | NM_201632    | transcription factor 7 (T-cell specific, HMG-box)                                             | 0.62 | 5.20E-03 |

|                 |              |                                                                      |      |          |
|-----------------|--------------|----------------------------------------------------------------------|------|----------|
| <b>FES</b>      | NM_002005    | feline sarcoma oncogene                                              | 0.62 | 2.67E-02 |
| <b>EGR1</b>     | NM_001964    | early growth response 1                                              | 0.62 | 2.26E-02 |
| <b>AP1S2</b>    | NM_001272071 | adaptor-related protein complex 1, sigma 2 subunit                   | 0.61 | 1.90E-02 |
| <b>MDK</b>      | NM_001270550 | midkine (neurite growth-promoting factor 2)                          | 0.61 | 3.44E-02 |
| <b>CD1E</b>     | NM_001042584 | CD1e molecule                                                        | 0.61 | 3.20E-02 |
| <b>TCF4</b>     | NM_001243234 | transcription factor 4                                               | 0.61 | 2.21E-03 |
| <b>TNFRSF14</b> | NM_003820    | tumor necrosis factor receptor superfamily, member 14                | 0.61 | 1.50E-02 |
| <b>CPA3</b>     | NM_001870    | carboxypeptidase A3 (mast cell)                                      | 0.61 | 1.64E-02 |
| <b>FNBP1</b>    | NM_015033    | formin binding protein 1                                             | 0.61 | 1.10E-02 |
| <b>NNMT</b>     | NM_006169    | nicotinamide N-methyltransferase                                     | 0.61 | 6.34E-03 |
| <b>PTGER4</b>   | NM_000958    | prostaglandin E receptor 4 (subtype EP4)                             | 0.61 | 5.94E-03 |
| <b>CEBPA</b>    | NM_001285829 | CCAAT/enhancer binding protein (C/EBP), alpha                        | 0.61 | 1.60E-02 |
| <b>CEBPB</b>    | NM_001285878 | CCAAT/enhancer binding protein (C/EBP), beta                         | 0.61 | 3.95E-02 |
| <b>HLA-DRB5</b> | NM_002125    | major histocompatibility complex, class II, DR beta 5                | 0.61 | 7.17E-03 |
| <b>GPSM3</b>    | NM_022107    | G-protein signaling modulator 3                                      | 0.61 | 4.50E-03 |
| <b>CNKS2</b>    | NM_001168648 | connector enhancer of kinase suppressor of Ras 2                     | 0.60 | 4.48E-02 |
| <b>VWF</b>      | NM_000552    | von Willebrand factor                                                | 0.60 | 1.63E-02 |
| <b>KIAA0930</b> | NM_001009880 | KIAA0930                                                             | 0.60 | 3.81E-03 |
| <b>DDB2</b>     | NM_000107    | damage-specific DNA binding protein 2, 48kDa                         | 0.60 | 2.26E-02 |
| <b>PLXNC1</b>   | NM_005761    | plexin C1                                                            | 0.60 | 4.47E-03 |
| <b>HK3</b>      | NM_002115    | hexokinase 3 (white cell)                                            | 0.60 | 1.75E-02 |
| <b>CCL18</b>    | NM_002988    | chemokine (C-C motif) ligand 18 (pulmonary and activation-regulated) | 0.60 | 4.19E-02 |
| <b>PDLIM1</b>   | NM_020992    | PDZ and LIM domain 1                                                 | 0.60 | 1.78E-02 |

|                |              |                                                                                         |      |          |
|----------------|--------------|-----------------------------------------------------------------------------------------|------|----------|
| <b>CXCL6</b>   | NM_002993    | chemokine (C-X-C motif) ligand 6                                                        | 0.60 | 1.82E-02 |
| <b>CXCR3</b>   | NM_001142797 | chemokine (C-X-C motif) receptor 3                                                      | 0.59 | 3.48E-02 |
| <b>XAF1</b>    | NM_199139    | XIAP associated factor 1                                                                | 0.59 | 4.70E-03 |
| <b>DENND4B</b> | NM_014856    | DENN/MADD domain containing 4B                                                          | 0.59 | 2.04E-02 |
| <b>ARPC2</b>   | NM_152862    | actin related protein 2/3 complex, subunit 2, 34kDa                                     | 0.59 | 5.41E-03 |
| <b>JUNB</b>    | NM_002229    | jun B proto-oncogene                                                                    | 0.58 | 1.84E-02 |
| <b>GNAI2</b>   | NM_001282618 | guanine nucleotide binding protein (G protein), alpha inhibiting activity polypeptide 2 | 0.58 | 1.76E-02 |
| <b>ELF4</b>    | NM_001127197 | E74-like factor 4 (ets domain transcription factor)                                     | 0.58 | 9.92E-03 |
| <b>PLXND1</b>  | NM_015103    | plexin D1                                                                               | 0.58 | 5.45E-03 |
| <b>CH25H</b>   | NM_003956    | cholesterol 25-hydroxylase                                                              | 0.58 | 2.13E-02 |
| <b>CP</b>      | NM_000096    | ceruloplasmin (ferroxidase)                                                             | 0.58 | 3.28E-03 |
| <b>CCR6</b>    | NM_031409    | chemokine (C-C motif) receptor 6                                                        | 0.58 | 2.19E-02 |
| <b>FN1</b>     | NM_212482    | fibronectin 1                                                                           | 0.58 | 1.71E-03 |
| <b>F13A1</b>   | NM_000129    | coagulation factor XIII, A1 polypeptide                                                 | 0.58 | 2.23E-02 |
| <b>CENPF</b>   | NM_016343    | centromere protein F, 350/400kDa                                                        | 0.58 | 1.34E-02 |
| <b>HOPX</b>    | NM_001145460 | HOP homeobox                                                                            | 0.58 | 1.55E-02 |
| <b>HSD11B1</b> | NM_181755    | hydroxysteroid (11-beta) dehydrogenase 1                                                | 0.58 | 4.50E-02 |
| <b>RASGRP2</b> | NM_001098670 | RAS guanyl releasing protein 2 (calcium and DAG-regulated)                              | 0.58 | 4.42E-02 |
| <b>SELP</b>    | NM_003005    | selectin P (granule membrane protein 140kDa, antigen CD62)                              | 0.58 | 2.28E-02 |
| <b>CBFA2T3</b> | NM_175931    | core-binding factor, runt domain, alpha subunit 2; translocated to, 3                   | 0.57 | 2.32E-02 |
| <b>IL16</b>    | NM_172217    | interleukin 16                                                                          | 0.57 | 5.76E-03 |
| <b>FCHO1</b>   | NM_001161357 | FCH domain only 1                                                                       | 0.57 | 3.59E-02 |
| <b>TCL1A</b>   | NM_001098725 | T-cell leukemia/lymphoma 1A                                                             | 0.57 | 1.15E-02 |

|               |              |                                                                                   |      |          |
|---------------|--------------|-----------------------------------------------------------------------------------|------|----------|
| <b>SLC1A4</b> | NM_003038    | solute carrier family 1 (glutamate/neutral amino acid transporter), member 4      | 0.57 | 2.97E-02 |
| <b>CSF3R</b>  | NM_000760    | colony stimulating factor 3 receptor (granulocyte)                                | 0.57 | 1.08E-02 |
| <b>TRAFD1</b> | NM_006700    | TRAF-type zinc finger domain containing 1                                         | 0.57 | 4.09E-03 |
| <b>INHBA</b>  | NM_002192    | inhibin, beta A                                                                   | 0.57 | 9.12E-03 |
| <b>JAK2</b>   | NM_004972    | Janus kinase 2                                                                    | 0.57 | 6.67E-03 |
| <b>P2RX1</b>  | NM_002558    | purinergic receptor P2X, ligand-gated ion channel, 1                              | 0.57 | 2.51E-02 |
| <b>CRIP1</b>  | NM_001311    | cysteine-rich protein 1 (intestinal)                                              | 0.57 | 2.53E-02 |
| <b>ELF1</b>   | NM_001145353 | E74-like factor 1 (ets domain transcription factor)                               | 0.57 | 2.53E-02 |
| <b>IL2RA</b>  | NM_000417    | interleukin 2 receptor, alpha                                                     | 0.56 | 1.31E-02 |
| <b>IL27RA</b> | NM_004843    | interleukin 27 receptor, alpha                                                    | 0.56 | 1.58E-02 |
| <b>MSL3</b>   | NM_078629    | male-specific lethal 3 homolog (Drosophila)                                       | 0.56 | 8.03E-03 |
| <b>CBLB</b>   | NM_170662    | Cbl proto-oncogene B, E3 ubiquitin protein ligase                                 | 0.56 | 2.54E-02 |
| <b>VIM</b>    | NM_003380    | vimentin                                                                          | 0.56 | 1.43E-02 |
| <b>CARD8</b>  | NR_033680    | caspase recruitment domain family, member 8                                       | 0.56 | 5.42E-03 |
| <b>FBN2</b>   | NM_001999    | fibrillin 2                                                                       | 0.56 | 1.81E-02 |
| <b>COL8A1</b> | NM_001850    | collagen, type VIII, alpha 1                                                      | 0.55 | 1.21E-02 |
| <b>KCNMB1</b> | NM_004137    | potassium large conductance calcium-activated channel, subfamily M, beta member 1 | 0.55 | 1.52E-02 |
| <b>PSME1</b>  | NM_001281528 | proteasome (prosome, macropain) activator subunit 1 (PA28 alpha)                  | 0.55 | 3.34E-02 |
| <b>TRIM21</b> | NM_003141    | tripartite motif containing 21                                                    | 0.55 | 3.07E-02 |
| <b>ITGAD</b>  | NM_005353    | integrin, alpha D                                                                 | 0.55 | 4.82E-02 |
| <b>MCL1</b>   | NM_021960    | myeloid cell leukemia 1                                                           | 0.55 | 2.01E-02 |
| <b>TNC</b>    | NM_002160    | tenascin C                                                                        | 0.55 | 8.91E-03 |

|                  |              |                                                                                       |      |          |
|------------------|--------------|---------------------------------------------------------------------------------------|------|----------|
| <b>TNFRSF11A</b> | NM_001270949 | tumor necrosis factor receptor superfamily, member 11a, NFkB activator                | 0.55 | 1.66E-02 |
| <b>IRF7</b>      | NM_004031    | interferon regulatory factor 7                                                        | 0.55 | 3.24E-02 |
| <b>TUBA1A</b>    | NM_006009    | tubulin, alpha 1a                                                                     | 0.55 | 3.16E-02 |
| <b>MDFIC</b>     | NM_199072    | MyoD family inhibitor domain containing                                               | 0.55 | 4.24E-02 |
| <b>SMCHD1</b>    | NM_015295    | structural maintenance of chromosomes flexible hinge domain containing 1              | 0.55 | 1.21E-02 |
| <b>DCK</b>       | NM_000788    | deoxycytidine kinase                                                                  | 0.55 | 3.29E-02 |
| <b>P2RY6</b>     | NM_001277204 | pyrimidinergic receptor P2Y, G-protein coupled, 6                                     | 0.54 | 3.36E-02 |
| <b>MARCO</b>     | NM_006770    | macrophage receptor with collagenous structure                                        | 0.54 | 3.50E-02 |
| <b>ADRA2A</b>    | NM_000681    | adrenoceptor alpha 2A                                                                 | 0.54 | 3.53E-02 |
| <b>CIITA</b>     | NR_104444    | class II, major histocompatibility complex, transactivator                            | 0.54 | 3.37E-02 |
| <b>CCL19</b>     | NM_006274    | chemokine (C-C motif) ligand 19                                                       | 0.54 | 3.45E-02 |
| <b>ANXA1</b>     | NM_000700    | annexin A1                                                                            | 0.54 | 2.07E-02 |
| <b>DKK3</b>      | NM_013253    | dickkopf WNT signaling pathway inhibitor 3                                            | 0.54 | 1.35E-02 |
| <b>STAB1</b>     | NM_015136    | stabilin 1                                                                            | 0.54 | 7.40E-03 |
| <b>PTGS1</b>     | NM_001271165 | prostaglandin-endoperoxide synthase 1 (prostaglandin G/H synthase and cyclooxygenase) | 0.54 | 1.44E-02 |
| <b>MCAM</b>      | NM_006500    | melanoma cell adhesion molecule                                                       | 0.53 | 3.81E-03 |
| <b>SYT11</b>     | NM_152280    | synaptotagmin XI                                                                      | 0.53 | 1.91E-02 |
| <b>LGALS1</b>    | NM_002305    | lectin, galactoside-binding, soluble, 1                                               | 0.53 | 3.79E-02 |
| <b>HLX</b>       | NM_021958    | H2.0-like homeobox                                                                    | 0.53 | 3.81E-02 |
| <b>S100A9</b>    | NM_002965    | S100 calcium binding protein A9                                                       | 0.53 | 3.81E-02 |
| <b>CASP3</b>     | NM_004346    | caspase 3, apoptosis-related cysteine peptidase                                       | 0.53 | 3.07E-02 |
| <b>CD47</b>      | NM_001777    | CD47 molecule                                                                         | 0.53 | 2.80E-03 |
| <b>RAD51AP1</b>  | NM_001130862 | RAD51 associated protein 1                                                            | 0.53 | 3.92E-02 |

|               |              |                                                                              |      |          |
|---------------|--------------|------------------------------------------------------------------------------|------|----------|
| <b>REL</b>    | NM_001291746 | v-rel avian reticuloendotheliosis viral oncogene homolog                     | 0.53 | 3.00E-02 |
| <b>FOLR2</b>  | NM_001113534 | folate receptor 2 (fetal)                                                    | 0.52 | 2.19E-02 |
| <b>SRPX2</b>  | NM_014467    | sushi-repeat containing protein, X-linked 2                                  | 0.52 | 3.25E-02 |
| <b>CCL2</b>   | NM_002982    | chemokine (C-C motif) ligand 2                                               | 0.52 | 3.55E-02 |
| <b>FLT3LG</b> | NM_001278638 | fms-related tyrosine kinase 3 ligand                                         | 0.52 | 2.28E-02 |
| <b>STK17A</b> | NM_004760    | serine/threonine kinase 17a                                                  | 0.52 | 1.33E-02 |
| <b>NCAPH</b>  | NM_001281712 | non-SMC condensin I complex, subunit H                                       | 0.52 | 4.33E-02 |
| <b>MYO9B</b>  | NM_004145    | myosin IXB                                                                   | 0.52 | 1.41E-02 |
| <b>ARNTL</b>  | NM_001030272 | aryl hydrocarbon receptor nuclear translocator-like                          | 0.52 | 2.43E-02 |
| <b>ATF3</b>   | NM_001206488 | activating transcription factor 3                                            | 0.52 | 2.68E-02 |
| <b>DNASE2</b> | NM_001375    | deoxyribonuclease II, lysosomal                                              | 0.52 | 4.99E-02 |
| <b>CFH</b>    | NM_001014975 | complement factor H                                                          | 0.52 | 4.46E-02 |
| <b>CD7</b>    | NM_006137    | CD7 molecule                                                                 | 0.51 | 2.47E-02 |
| <b>FANCI</b>  | NM_001113378 | Fanconi anemia, complementation group I                                      | 0.51 | 4.80E-02 |
| <b>MAMLD1</b> | NM_001177465 | mastermind-like domain containing 1                                          | 0.51 | 4.51E-02 |
| <b>ASCL2</b>  | NM_005170    | achaete-scute family bHLH transcription factor 2                             | 0.51 | 4.50E-02 |
| <b>RGS2</b>   | NM_002923    | regulator of G-protein signaling 2, 24kDa                                    | 0.51 | 4.62E-02 |
| <b>RRAS</b>   | NM_006270    | related RAS viral (r-ras) oncogene homolog                                   | 0.51 | 4.37E-02 |
| <b>ITGBL1</b> | NM_004791    | integrin, beta-like 1 (with EGF-like repeat domains)                         | 0.51 | 9.99E-03 |
| <b>MANF</b>   | NM_006010    | mesencephalic astrocyte-derived neurotrophic factor                          | 0.51 | 4.71E-02 |
| <b>IFIT3</b>  | NM_001289758 | interferon-induced protein with tetratricopeptide repeats 3                  | 0.51 | 2.60E-02 |
| <b>RSAD2</b>  | NM_080657    | radical S-adenosyl methionine domain containing 2                            | 0.51 | 2.62E-02 |
| <b>CD55</b>   | NM_001114752 | CD55 molecule, decay accelerating factor for complement (Cromer blood group) | 0.51 | 1.71E-02 |

|                |              |                                                                  |      |          |
|----------------|--------------|------------------------------------------------------------------|------|----------|
| <b>STAT5A</b>  | NM_001288719 | signal transducer and activator of transcription 5A              | 0.51 | 4.52E-02 |
| <b>BTG1</b>    | NM_001731    | B-cell translocation gene 1, anti-proliferative                  | 0.51 | 2.39E-02 |
| <b>ZNF101</b>  | NM_033204    | zinc finger protein 101                                          | 0.50 | 2.66E-02 |
| <b>THBD</b>    | NM_000361    | thrombomodulin                                                   | 0.50 | 1.91E-02 |
| <b>NOTCH2</b>  | NM_001200001 | notch 2                                                          | 0.50 | 1.31E-02 |
| <b>RRM2</b>    | NM_001034    | ribonucleotide reductase M2                                      | 0.50 | 3.00E-02 |
| <b>SLCO3A1</b> | NM_001145044 | solute carrier organic anion transporter family, member 3A1      | 0.50 | 1.34E-02 |
| <b>VAMP5</b>   | NM_006634    | vesicle-associated membrane protein 5                            | 0.50 | 4.44E-02 |
| <b>CCND2</b>   | NM_001759    | cyclin D2                                                        | 0.50 | 1.94E-02 |
| <b>LTB</b>     | NM_002341    | lymphotoxin beta (TNF superfamily, member 3)                     | 0.49 | 2.39E-02 |
| <b>KLF6</b>    | NR_027653    | Kruppel-like factor 6                                            | 0.49 | 1.09E-02 |
| <b>SLC20A1</b> | NM_005415    | solute carrier family 20 (phosphate transporter), member 1       | 0.49 | 3.24E-02 |
| <b>ARPC5</b>   | NM_001270439 | actin related protein 2/3 complex, subunit 5, 16kDa              | 0.49 | 2.12E-02 |
| <b>ANGPT2</b>  | NM_001118887 | angiopoietin 2                                                   | 0.49 | 1.41E-02 |
| <b>C1S</b>     | NM_001734    | complement component 1, s subcomponent                           | 0.49 | 3.28E-02 |
| <b>PRKY</b>    | NR_028062    | protein kinase, Y-linked, pseudogene                             | 0.49 | 3.33E-02 |
| <b>TAPBP</b>   | NM_003190    | TAP binding protein (tapasin)                                    | 0.49 | 1.80E-02 |
| <b>AREG</b>    | NM_001657    | amphiregulin                                                     | 0.49 | 4.25E-02 |
| <b>SSPN</b>    | NM_005086    | sarcospan                                                        | 0.49 | 4.62E-02 |
| <b>DYRK2</b>   | NM_006482    | dual-specificity tyrosine-(Y)-phosphorylation regulated kinase 2 | 0.49 | 1.46E-02 |
| <b>CCL23</b>   | NM_005064    | chemokine (C-C motif) ligand 23                                  | 0.49 | 3.29E-02 |
| <b>XPO6</b>    | NM_015171    | exportin 6                                                       | 0.48 | 3.70E-02 |
| <b>RAP2B</b>   | NM_002886    | RAP2B, member of RAS oncogene family                             | 0.48 | 1.65E-02 |
| <b>SYK</b>     | NM_003177    | spleen tyrosine kinase                                           | 0.48 | 1.55E-02 |

|                 |              |                                                                                |      |          |
|-----------------|--------------|--------------------------------------------------------------------------------|------|----------|
| <b>FAM89B</b>   | NM_001098785 | family with sequence similarity 89, member B                                   | 0.48 | 3.79E-02 |
| <b>CD5</b>      | NM_014207    | CD5 molecule                                                                   | 0.48 | 3.80E-02 |
| <b>EMP1</b>     | NM_001423    | epithelial membrane protein 1                                                  | 0.48 | 1.80E-02 |
| <b>TNFSF14</b>  | NM_172014    | tumor necrosis factor (ligand) superfamily, member 14                          | 0.48 | 3.86E-02 |
| <b>C15orf39</b> | NM_015492    | chromosome 15 open reading frame 39                                            | 0.47 | 2.78E-02 |
| <b>KPNA2</b>    | NM_002266    | karyopherin alpha 2 (RAG cohort 1, importin alpha 1)                           | 0.47 | 3.76E-02 |
| <b>LYST</b>     | NM_000081    | lysosomal trafficking regulator                                                | 0.47 | 1.97E-02 |
| <b>TEP1</b>     | NM_007110    | telomerase-associated protein 1                                                | 0.47 | 4.37E-02 |
| <b>N4BP2L1</b>  | NM_001079691 | NEDD4 binding protein 2-like 1                                                 | 0.47 | 7.30E-03 |
| <b>BTN2A1</b>   | NM_001197233 | butyrophilin, subfamily 2, member A1                                           | 0.47 | 2.27E-02 |
| <b>CAP1</b>     | NM_006367    | CAP, adenylate cyclase-associated protein 1 (yeast)                            | 0.47 | 4.45E-02 |
| <b>LILRA2</b>   | NM_001290271 | leukocyte immunoglobulin-like receptor, subfamily A (with TM domain), member 2 | 0.47 | 2.27E-02 |
| <b>TFPI2</b>    | NM_001271003 | tissue factor pathway inhibitor 2                                              | 0.46 | 3.59E-02 |
| <b>IFFO1</b>    | NM_001193457 | intermediate filament family orphan 1                                          | 0.46 | 4.65E-02 |
| <b>PIP4K2A</b>  | NM_005028    | phosphatidylinositol-5-phosphate 4-kinase, type II, alpha                      | 0.46 | 3.08E-02 |
| <b>TLR6</b>     | NM_006068    | toll-like receptor 6                                                           | 0.46 | 4.75E-02 |
| <b>RGS4</b>     | NM_001113380 | regulator of G-protein signaling 4                                             | 0.44 | 4.42E-02 |
| <b>GLUL</b>     | NM_001033056 | glutamate-ammonia ligase                                                       | 0.44 | 2.94E-02 |
| <b>LRP8</b>     | NM_033300    | low density lipoprotein receptor-related protein 8, apolipoprotein e receptor  | 0.44 | 4.27E-02 |
| <b>IFNGR1</b>   | NM_000416    | interferon gamma receptor 1                                                    | 0.43 | 4.56E-02 |
| <b>SERPINB1</b> | NR_073111    | serpin peptidase inhibitor, clade B (ovalbumin), member 1                      | 0.43 | 3.80E-02 |
| <b>CR1</b>      | NM_000573    | complement component (3b/4b) receptor 1 (Knops blood group)                    | 0.42 | 2.92E-02 |
| <b>CASP8</b>    | NM_001080124 | caspase 8, apoptosis-related cysteine peptidase                                | 0.42 | 4.99E-02 |

|                 |              |                                                                                         |       |          |
|-----------------|--------------|-----------------------------------------------------------------------------------------|-------|----------|
| <b>ETV6</b>     | NM_001987    | ets variant 6                                                                           | 0.42  | 4.14E-02 |
| <b>ANXA2</b>    | NM_004039    | annexin A2                                                                              | 0.42  | 4.37E-02 |
| <b>IL1RN</b>    | NM_173843    | interleukin 1 receptor antagonist                                                       | 0.41  | 4.83E-02 |
| <b>ARHGEF2</b>  | NM_001162384 | Rho/Rac guanine nucleotide exchange factor (GEF) 2                                      | 0.41  | 4.42E-02 |
| <b>INPP4A</b>   | NM_001566    | inositol polyphosphate-4-phosphatase, type I, 107kDa                                    | 0.40  | 3.06E-02 |
| <b>GRK5</b>     | NM_005308    | G protein-coupled receptor kinase 5                                                     | 0.40  | 3.95E-02 |
| <b>6-Sep</b>    | NM_015129    | septin 6                                                                                | 0.40  | 4.33E-02 |
| <b>RUNX1T1</b>  | NM_001198627 | runt-related transcription factor 1; translocated to, 1 (cyclin D-related)              | 0.40  | 4.91E-02 |
| <b>PTPN2</b>    | NM_002828    | protein tyrosine phosphatase, non-receptor type 2                                       | 0.39  | 4.05E-02 |
| <b>NAP1L1</b>   | NM_139207    | nucleosome assembly protein 1-like 1                                                    | 0.38  | 3.74E-02 |
| <b>MBNL1</b>    | NM_207294    | muscleblind-like splicing regulator 1                                                   | 0.37  | 4.44E-02 |
| <b>ACACB</b>    | NM_001093    | acetyl-CoA carboxylase beta                                                             | -0.39 | 4.10E-02 |
| <b>HNF4A</b>    | NM_001287183 | hepatocyte nuclear factor 4, alpha                                                      | -0.40 | 4.27E-02 |
| <b>SLC25A16</b> | NM_152707    | solute carrier family 25 (mitochondrial carrier; Graves disease autoantigen), member 16 | -0.41 | 4.97E-02 |
| <b>ATXN7L1</b>  | NM_138495    | ataxin 7-like 1                                                                         | -0.42 | 2.64E-02 |
| <b>SUCLG2</b>   | NM_003848    | succinate-CoA ligase, GDP-forming, beta subunit                                         | -0.42 | 3.79E-02 |
| <b>ANK3</b>     | NM_001204403 | ankyrin 3, node of Ranvier (ankyrin G)                                                  | -0.43 | 2.95E-02 |
| <b>YIPF6</b>    | NM_173834    | Yip1 domain family, member 6                                                            | -0.43 | 3.79E-02 |
| <b>ATP6V1C1</b> | NM_001695    | ATPase, H <sup>+</sup> transporting, lysosomal 42kDa, V1 subunit C1                     | -0.43 | 3.74E-02 |
| <b>WDFY3</b>    | NM_014991    | WD repeat and FYVE domain containing 3                                                  | -0.44 | 3.52E-02 |
| <b>SEPHS1</b>   | NM_001195602 | selenophosphate synthetase 1                                                            | -0.44 | 4.14E-02 |
| <b>CLN5</b>     | NM_006493    | ceroid-lipofuscinosis, neuronal 5                                                       | -0.44 | 4.48E-02 |
| <b>ALDOB</b>    | NM_000035    | aldolase B, fructose-bisphosphate                                                       | -0.44 | 1.14E-02 |

|                |              |                                                                                 |       |          |
|----------------|--------------|---------------------------------------------------------------------------------|-------|----------|
| <b>WWC1</b>    | NM_015238    | WW and C2 domain containing 1                                                   | -0.45 | 1.20E-02 |
| <b>MAP3K13</b> | NR_038322    | mitogen-activated protein kinase kinase kinase 13                               | -0.45 | 4.44E-02 |
| <b>DUSP3</b>   | NM_004090    | dual specificity phosphatase 3                                                  | -0.45 | 3.48E-02 |
| <b>TSPAN9</b>  | NM_006675    | tetraspanin 9                                                                   | -0.45 | 4.19E-02 |
| <b>GNG12</b>   | NM_018841    | guanine nucleotide binding protein (G protein), gamma 12                        | -0.45 | 3.64E-02 |
| <b>CEL</b>     | NM_001807    | carboxyl ester lipase                                                           | -0.46 | 4.87E-02 |
| <b>FARP1</b>   | NM_001286839 | FERM, RhoGEF (ARHGEF) and pleckstrin domain protein 1 (chondrocyte-derived)     | -0.46 | 1.53E-02 |
| <b>BDH1</b>    | NM_004051    | 3-hydroxybutyrate dehydrogenase, type 1                                         | -0.46 | 4.90E-02 |
| <b>SLC35D1</b> | NM_015139    | solute carrier family 35 (UDP-GlcA/UDP-GalNAc transporter), member D1           | -0.47 | 3.12E-02 |
| <b>CHP1</b>    | NM_007236    | calcineurin-like EF-hand protein 1                                              | -0.47 | 4.49E-02 |
| <b>TSPYL1</b>  | NM_003309    | TSPY-like 1                                                                     | -0.47 | 3.45E-02 |
| <b>SKP1</b>    | NM_006930    | S-phase kinase-associated protein 1                                             | -0.47 | 2.47E-02 |
| <b>ATP5F1</b>  | NM_001688    | ATP synthase, H <sup>+</sup> transporting, mitochondrial Fo complex, subunit B1 | -0.47 | 4.46E-02 |
| <b>NR1I3</b>   | NM_001077481 | nuclear receptor subfamily 1, group I, member 3                                 | -0.47 | 4.45E-02 |
| <b>SNX4</b>    | NM_003794    | sorting nexin 4                                                                 | -0.47 | 4.20E-02 |
| <b>LAPTM4B</b> | NM_018407    | lysosomal protein transmembrane 4 beta                                          | -0.47 | 4.25E-02 |
| <b>B3GNT1</b>  | NM_006876    | UDP-GlcNAc:betaGal beta-1,3-N-acetylglucosaminyltransferase 1                   | -0.47 | 4.38E-02 |
| <b>B4GALT4</b> | NM_212543    | UDP-Gal:betaGlcNAc beta 1,4-galactosyltransferase, polypeptide 4                | -0.47 | 4.25E-02 |
| <b>TFDP2</b>   | NM_001178142 | transcription factor Dp-2 (E2F dimerization partner 2)                          | -0.47 | 1.86E-02 |
| <b>CACNA1D</b> | NM_000720    | calcium channel, voltage-dependent, L type, alpha 1D subunit                    | -0.48 | 1.80E-02 |
| <b>SIPA1L1</b> | NM_001284247 | signal-induced proliferation-associated 1 like                                  | -0.48 | 4.50E-02 |

|                 |              | 1                                                            |       |          |
|-----------------|--------------|--------------------------------------------------------------|-------|----------|
| <b>SERPINC1</b> | NM_000488    | serpin peptidase inhibitor, clade C (antithrombin), member 1 | -0.48 | 3.83E-02 |
| <b>NPY6R</b>    | NR_002713    | neuropeptide Y receptor Y6 (pseudogene)                      | -0.48 | 3.71E-02 |
| <b>CALM1</b>    | NM_006888    | calmodulin 1 (phosphorylase kinase, delta)                   | -0.48 | 1.90E-02 |
| <b>COX7B</b>    | NM_001866    | cytochrome c oxidase subunit VIIb                            | -0.49 | 4.03E-02 |
| <b>DNAJC16</b>  | NM_001287811 | DnaJ (Hsp40) homolog, subfamily C, member 16                 | -0.49 | 2.32E-02 |
| <b>STX7</b>     | NM_003569    | syntaxin 7                                                   | -0.49 | 2.66E-02 |
| <b>ERLIN2</b>   | NM_001003791 | ER lipid raft associated 2                                   | -0.49 | 1.89E-02 |
| <b>BRE</b>      | NM_199191    | brain and reproductive organ-expressed (TNFRSF1A modulator)  | -0.49 | 2.77E-02 |
| <b>PREPL</b>    | NM_001042386 | prolyl endopeptidase-like                                    | -0.50 | 3.86E-02 |
| <b>PDZD2</b>    | NM_178140    | PDZ domain containing 2                                      | -0.50 | 2.03E-02 |
| <b>PROSC</b>    | NM_007198    | proline synthetase co-transcribed homolog (bacterial)        | -0.50 | 1.08E-02 |
| <b>APOOL</b>    | NM_198450    | apolipoprotein O-like                                        | -0.50 | 1.43E-02 |
| <b>DUS4L</b>    | NM_181581    | dihydrouridine synthase 4-like ( <i>S. cerevisiae</i> )      | -0.50 | 3.01E-02 |
| <b>HSPA4</b>    | NM_002154    | heat shock 70kDa protein 4                                   | -0.50 | 3.87E-02 |
| <b>FTH1</b>     | NM_002032    | ferritin, heavy polypeptide 1                                | -0.50 | 1.95E-02 |
| <b>GSTM4</b>    | NR_024538    | glutathione S-transferase mu 4                               | -0.50 | 3.06E-02 |
| <b>OCEL1</b>    | NM_024578    | occludin/ELL domain containing 1                             | -0.50 | 4.92E-02 |
| <b>RNF14</b>    | NM_183399    | ring finger protein 14                                       | -0.50 | 3.04E-02 |
| <b>SLC19A2</b>  | NM_006996    | solute carrier family 19 (thiamine transporter), member 2    | -0.51 | 4.88E-02 |
| <b>HSDL2</b>    | NM_001195822 | hydroxysteroid dehydrogenase like 2                          | -0.51 | 1.20E-02 |
| <b>PRKAA2</b>   | NM_006252    | protein kinase, AMP-activated, alpha 2 catalytic subunit     | -0.51 | 3.79E-02 |
| <b>PAFAH2</b>   | NM_000437    | platelet-activating factor acetylhydrolase 2, 40kDa          | -0.51 | 2.67E-02 |

|                 |              |                                                                           |       |          |
|-----------------|--------------|---------------------------------------------------------------------------|-------|----------|
| <b>PEX5</b>     | NM_001131023 | peroxisomal biogenesis factor 5                                           | -0.51 | 2.47E-02 |
| <b>ST3GAL1</b>  | NM_173344    | ST3 beta-galactoside alpha-2,3-sialyltransferase 1                        | -0.51 | 1.45E-02 |
| <b>VAPB</b>     | NM_001195677 | VAMP (vesicle-associated membrane protein)-associated protein B and C     | -0.51 | 3.79E-02 |
| <b>SLC22A13</b> | NM_004256    | solute carrier family 22 (organic anion/urate transporter), member 13     | -0.51 | 4.53E-02 |
| <b>MDH2</b>     | NR_104165    | malate dehydrogenase 2, NAD (mitochondrial)                               | -0.51 | 2.52E-02 |
| <b>CDKL1</b>    | NM_004196    | cyclin-dependent kinase-like 1 (CDC2-related kinase)                      | -0.52 | 1.46E-02 |
| <b>FUT6</b>     | NM_000150    | fucosyltransferase 6 (alpha (1,3) fucosyltransferase)                     | -0.52 | 7.40E-03 |
| <b>ACP5</b>     | NM_001611    | acid phosphatase 5, tartrate resistant                                    | -0.52 | 4.43E-02 |
| <b>CRADD</b>    | NM_003805    | CASP2 and RIPK1 domain containing adaptor with death domain               | -0.52 | 4.14E-02 |
| <b>OCRL</b>     | NM_001587    | oculocerebrorenal syndrome of Lowe                                        | -0.52 | 2.19E-02 |
| <b>POLR2C</b>   | NM_032940    | polymerase (RNA) II (DNA directed) polypeptide C, 33kDa                   | -0.52 | 4.64E-02 |
| <b>HNF1B</b>    | NM_000458    | HNF1 homeobox B                                                           | -0.52 | 2.07E-02 |
| <b>PPARA</b>    | NM_001001928 | peroxisome proliferator-activated receptor alpha                          | -0.52 | 3.36E-03 |
| <b>FAM50B</b>   | NM_012135    | family with sequence similarity 50, member B                              | -0.52 | 4.27E-02 |
| <b>EIF4EBP2</b> | NM_004096    | eukaryotic translation initiation factor 4E binding protein 2             | -0.52 | 6.47E-03 |
| <b>TBCE</b>     | NM_003193    | tubulin folding cofactor E                                                | -0.52 | 2.26E-02 |
| <b>STX3</b>     | NM_004177    | syntaxin 3                                                                | -0.52 | 1.43E-02 |
| <b>HSPA9</b>    | NM_004134    | heat shock 70kDa protein 9 (mortalin)                                     | -0.52 | 1.16E-02 |
| <b>SLC25A20</b> | NM_000387    | solute carrier family 25 (carnitine/acylcarnitine translocase), member 20 | -0.52 | 4.11E-02 |
| <b>LAMP2</b>    | NM_001122606 | lysosomal-associated membrane protein 2                                   | -0.53 | 2.53E-02 |

|                |              |                                                                              |       |          |
|----------------|--------------|------------------------------------------------------------------------------|-------|----------|
| <b>PROC</b>    | NM_000312    | protein C (inactivator of coagulation factors Va and VIIIa)                  | -0.53 | 4.03E-02 |
| <b>AOX1</b>    | NM_001159    | aldehyde oxidase 1                                                           | -0.53 | 2.07E-02 |
| <b>CCT6B</b>   | NM_006584    | chaperonin containing TCP1, subunit 6B (zeta 2)                              | -0.53 | 3.91E-02 |
| <b>MMACHC</b>  | NM_015506    | methylmalonic aciduria (cobalamin deficiency) cblC type, with homocystinuria | -0.53 | 3.86E-02 |
| <b>DFNA5</b>   | NM_001127454 | deafness, autosomal dominant 5                                               | -0.53 | 3.83E-02 |
| <b>PTGER3</b>  | NR_028293    | prostaglandin E receptor 3 (subtype EP3)                                     | -0.53 | 2.01E-02 |
| <b>MTFR1</b>   | NM_001145839 | mitochondrial fission regulator 1                                            | -0.53 | 1.65E-02 |
| <b>PROZ</b>    | NM_001256134 | protein Z, vitamin K-dependent plasma glycoprotein                           | -0.53 | 3.76E-02 |
| <b>ILVBL</b>   | NM_006844    | ilvB (bacterial acetolactate synthase)-like                                  | -0.53 | 2.64E-02 |
| <b>FDX1</b>    | NM_004109    | ferredoxin 1                                                                 | -0.53 | 1.17E-02 |
| <b>DNAJA3</b>  | NM_001286516 | DnaJ (Hsp40) homolog, subfamily A, member 3                                  | -0.54 | 3.87E-02 |
| <b>LRBA</b>    | NM_001199282 | LPS-responsive vesicle trafficking, beach and anchor containing              | -0.54 | 1.81E-02 |
| <b>ITM2B</b>   | NM_021999    | integral membrane protein 2B                                                 | -0.54 | 1.71E-02 |
| <b>PINK1</b>   | NM_032409    | PTEN induced putative kinase 1                                               | -0.54 | 2.28E-02 |
| <b>NDUFC1</b>  | NM_001184991 | NADH dehydrogenase (ubiquinone) 1, subcomplex unknown, 1, 6kDa               | -0.54 | 2.80E-02 |
| <b>NECAB2</b>  | NM_019065    | N-terminal EF-hand calcium binding protein 2                                 | -0.54 | 3.30E-02 |
| <b>GK</b>      | NM_001205019 | glycerol kinase                                                              | -0.55 | 5.09E-03 |
| <b>HPGD</b>    | NM_000860    | hydroxyprostaglandin dehydrogenase 15-(NAD)                                  | -0.55 | 5.42E-03 |
| <b>ALPL</b>    | NM_000478    | alkaline phosphatase, liver/bone/kidney                                      | -0.55 | 1.53E-02 |
| <b>AMFR</b>    | NM_001144    | autocrine motility factor receptor, E3 ubiquitin protein ligase              | -0.55 | 2.68E-02 |
| <b>SUPV3L1</b> | NM_003171    | suppressor of var1, 3-like 1 (S. cerevisiae)                                 | -0.55 | 3.36E-02 |
| <b>FCN3</b>    | NM_003665    | ficolin (collagen/fibrinogen domain)                                         | -0.55 | 3.08E-02 |

|                 |              |                                                                                               |       |          |
|-----------------|--------------|-----------------------------------------------------------------------------------------------|-------|----------|
|                 |              | containing) 3                                                                                 |       |          |
| <b>PACRG</b>    | NM_152410    | PARK2 co-regulated                                                                            | -0.55 | 1.52E-02 |
| <b>HLF</b>      | NM_002126    | hepatic leukemia factor                                                                       | -0.55 | 7.31E-03 |
| <b>SLC4A1</b>   | NM_000342    | solute carrier family 4 (anion exchanger), member 1 (Diego blood group)                       | -0.56 | 4.42E-02 |
| <b>ISCU</b>     | NM_014301    | iron-sulfur cluster assembly enzyme                                                           | -0.56 | 2.86E-02 |
| <b>SOSTDC1</b>  | NM_015464    | sclerostin domain containing 1                                                                | -0.56 | 3.07E-02 |
| <b>FTO</b>      | NM_001080432 | fat mass and obesity associated                                                               | -0.56 | 2.90E-02 |
| <b>LYRM1</b>    | NM_001128302 | LYR motif containing 1                                                                        | -0.56 | 4.38E-02 |
| <b>SERPINA4</b> | NM_001289032 | serpin peptidase inhibitor, clade A (alpha-1 antiproteinase, antitrypsin), member 4           | -0.56 | 2.83E-02 |
| <b>ACLY</b>     | NM_198830    | ATP citrate lyase                                                                             | -0.56 | 3.80E-02 |
| <b>COQ9</b>     | NM_020312    | coenzyme Q9                                                                                   | -0.56 | 1.40E-02 |
| <b>DSG2</b>     | NM_001943    | desmoglein 2                                                                                  | -0.56 | 1.35E-02 |
| <b>EGF</b>      | NM_001178131 | epidermal growth factor                                                                       | -0.56 | 2.67E-02 |
| <b>DDAH1</b>    | NM_001134445 | dimethylarginine dimethylaminohydrolase 1                                                     | -0.56 | 1.57E-02 |
| <b>MOAP1</b>    | NM_022151    | modulator of apoptosis 1                                                                      | -0.57 | 2.53E-02 |
| <b>BTD</b>      | NM_001281726 | biotinidase                                                                                   | -0.57 | 1.80E-02 |
| <b>SLC9A3R1</b> | NM_004252    | solute carrier family 9, subfamily A (NHE3, cation proton antiporter 3), member 3 regulator 1 | -0.57 | 2.43E-02 |
| <b>HAAO</b>     | NM_012205    | 3-hydroxyanthranilate 3,4-dioxygenase                                                         | -0.57 | 4.28E-02 |
| <b>ATP6V1D</b>  | NM_015994    | ATPase, H <sup>+</sup> transporting, lysosomal 34kDa, V1 subunit D                            | -0.57 | 6.34E-03 |
| <b>AP3S2</b>    | NR_023361    | adaptor-related protein complex 3, sigma 2 subunit                                            | -0.57 | 5.61E-03 |
| <b>ALDH1B1</b>  | NM_000692    | aldehyde dehydrogenase 1 family, member B1                                                    | -0.58 | 2.26E-02 |
| <b>ZCCHC14</b>  | NM_015144    | zinc finger, CCHC domain containing 14                                                        | -0.58 | 6.70E-03 |
| <b>SAP18</b>    | NM_005870    | Sin3A-associated protein, 18kDa                                                               | -0.58 | 2.53E-02 |
| <b>PRLR</b>     | NM_000949    | prolactin receptor                                                                            | -0.58 | 6.69E-03 |

|                 |              |                                                                                          |       |          |
|-----------------|--------------|------------------------------------------------------------------------------------------|-------|----------|
| <b>PKD2</b>     | NM_000297    | polycystic kidney disease 2 (autosomal dominant)                                         | -0.58 | 1.97E-02 |
| <b>PDHB</b>     | NM_001173468 | pyruvate dehydrogenase (lipoamide) beta                                                  | -0.58 | 2.56E-02 |
| <b>SUCLA2</b>   | NM_003850    | succinate-CoA ligase, ADP-forming, beta subunit                                          | -0.59 | 2.07E-02 |
| <b>ATP6V1B2</b> | NM_001693    | ATPase, H <sup>+</sup> transporting, lysosomal 56/58kDa, V1 subunit B2                   | -0.59 | 2.05E-02 |
| <b>ATP5C1</b>   | NM_005174    | ATP synthase, H <sup>+</sup> transporting, mitochondrial F1 complex, gamma polypeptide 1 | -0.59 | 7.17E-03 |
| <b>ALAD</b>     | NM_000031    | aminolevulinate dehydratase                                                              | -0.59 | 9.21E-03 |
| <b>DSCR3</b>    | NM_006052    | Down syndrome critical region gene 3                                                     | -0.59 | 1.46E-02 |
| <b>TUBG1</b>    | NM_001070    | tubulin, gamma 1                                                                         | -0.59 | 3.61E-02 |
| <b>CTDSPL</b>   | NM_001008392 | CTD (carboxy-terminal domain, RNA polymerase II, polypeptide A) small phosphatase-like   | -0.59 | 3.30E-02 |
| <b>PRKAG1</b>   | NM_001206710 | protein kinase, AMP-activated, gamma 1 non-catalytic subunit                             | -0.59 | 2.78E-02 |
| <b>RPP14</b>    | NR_049757    | ribonuclease P/MRP 14kDa subunit                                                         | -0.59 | 8.86E-03 |
| <b>CLDN8</b>    | NM_199328    | claudin 8                                                                                | -0.59 | 1.77E-02 |
| <b>INSR</b>     | NM_001079817 | insulin receptor                                                                         | -0.59 | 1.49E-03 |
| <b>PVALB</b>    | NM_002854    | parvalbumin                                                                              | -0.59 | 1.55E-02 |
| <b>C21orf33</b> | NM_004649    | chromosome 21 open reading frame 33                                                      | -0.60 | 7.17E-03 |
| <b>CLIC4</b>    | NM_013943    | chloride intracellular channel 4                                                         | -0.60 | 3.28E-02 |
| <b>RRAGD</b>    | NM_021244    | Ras-related GTP binding D                                                                | -0.60 | 7.43E-03 |
| <b>HMGCS2</b>   | NM_001166107 | 3-hydroxy-3-methylglutaryl-CoA synthase 2 (mitochondrial)                                | -0.60 | 7.42E-03 |
| <b>ADH6</b>     | NM_001102470 | alcohol dehydrogenase 6 (class V)                                                        | -0.60 | 7.69E-03 |
| <b>KIF13B</b>   | NM_015254    | kinesin family member 13B                                                                | -0.60 | 4.53E-02 |
| <b>KIFAP3</b>   | NM_001204514 | kinesin-associated protein 3                                                             | -0.60 | 4.63E-02 |
| <b>BBOX1</b>    | NM_003986    | butyrobetaine (gamma), 2-oxoglutarate dioxygenase (gamma-butyrobetaine                   | -0.60 | 4.01E-02 |

|                |              |                                                                                  |       |          |
|----------------|--------------|----------------------------------------------------------------------------------|-------|----------|
|                |              | hydroxylase) 1                                                                   |       |          |
| <b>MOCS1</b>   | NR_033233    | molybdenum cofactor synthesis 1                                                  | -0.60 | 1.55E-02 |
| <b>FHIT</b>    | NM_001166243 | fragile histidine triad                                                          | -0.61 | 3.48E-02 |
| <b>MRPL3</b>   | NM_007208    | mitochondrial ribosomal protein L3                                               | -0.61 | 1.54E-02 |
| <b>DDB1</b>    | NM_001923    | damage-specific DNA binding protein 1, 127kDa                                    | -0.61 | 4.97E-02 |
| <b>GADD45A</b> | NM_001199741 | growth arrest and DNA-damage-inducible, alpha                                    | -0.61 | 1.45E-02 |
| <b>AK2</b>     | NM_013411    | adenylate kinase 2                                                               | -0.61 | 3.30E-03 |
| <b>USH1C</b>   | NM_005709    | Usher syndrome 1C (autosomal recessive, severe)                                  | -0.61 | 9.34E-03 |
| <b>ASAH1</b>   | NM_001127505 | N-acylsphingosine amidohydrolase (acid ceramidase) 1                             | -0.61 | 3.87E-02 |
| <b>LSM3</b>    | NM_014463    | LSM3 homolog, U6 small nuclear RNA associated ( <i>S. cerevisiae</i> )           | -0.62 | 2.83E-02 |
| <b>AHCYL2</b>  | NM_001130720 | adenosylhomocysteinase-like 2                                                    | -0.62 | 3.76E-02 |
| <b>EPCAM</b>   | NM_002354    | epithelial cell adhesion molecule                                                | -0.62 | 2.64E-02 |
| <b>ACOX1</b>   | NM_007292    | acyl-CoA oxidase 1, palmitoyl                                                    | -0.62 | 1.32E-03 |
| <b>ORC4</b>    | NM_001190881 | origin recognition complex, subunit 4                                            | -0.62 | 1.48E-02 |
| <b>CDS1</b>    | NM_001263    | CDP-diacylglycerol synthase (phosphatidate cytidyltransferase) 1                 | -0.62 | 3.19E-02 |
| <b>MT1G</b>    | NM_005950    | metallothionein 1G                                                               | -0.62 | 3.63E-02 |
| <b>DLST</b>    | NR_033814    | dihydrolipoamide S-succinyltransferase (E2 component of 2-oxo-glutarate complex) | -0.62 | 1.05E-02 |
| <b>ALDH1A1</b> | NM_000689    | aldehyde dehydrogenase 1 family, member A1                                       | -0.62 | 1.29E-02 |
| <b>NPR3</b>    | NM_000908    | natriuretic peptide receptor 3                                                   | -0.63 | 2.47E-03 |
| <b>RAB40B</b>  | NM_006822    | RAB40B, member RAS oncogene family                                               | -0.63 | 7.40E-03 |
| <b>UBE2G1</b>  | NM_003342    | ubiquitin-conjugating enzyme E2G 1                                               | -0.63 | 2.13E-02 |
| <b>GATM</b>    | NM_001482    | glycine amidinotransferase (L-arginine:glycine amidinotransferase)               | -0.63 | 1.23E-02 |
| <b>ATCB1</b>   | NM_000927    | ATP-binding cassette, sub-family B                                               | -0.63 | 8.27E-03 |

|                 |              |                                                                                     |       |          |
|-----------------|--------------|-------------------------------------------------------------------------------------|-------|----------|
|                 |              | (MDR/TAP), member 1                                                                 |       |          |
| <b>TULP3</b>    | NM_003324    | tubby like protein 3                                                                | -0.63 | 3.10E-02 |
| <b>SERPINA6</b> | NM_001756    | serpin peptidase inhibitor, clade A (alpha-1 antiproteinase, antitrypsin), member 6 | -0.63 | 1.16E-02 |
| <b>FH</b>       | NM_000143    | fumarate hydratase                                                                  | -0.63 | 9.68E-03 |
| <b>KLK1</b>     | NM_002257    | kallikrein 1                                                                        | -0.64 | 1.80E-02 |
| <b>USP2</b>     | NM_004205    | ubiquitin specific peptidase 2                                                      | -0.64 | 1.16E-02 |
| <b>KBTBD11</b>  | NM_014867    | kelch repeat and BTB (POZ) domain containing 11                                     | -0.64 | 4.42E-02 |
| <b>GLO1</b>     | NM_006708    | glyoxalase I                                                                        | -0.64 | 1.04E-02 |
| <b>ACADVL</b>   | NM_001270448 | acyl-CoA dehydrogenase, very long chain                                             | -0.64 | 1.05E-02 |
| <b>ATP1B1</b>   | NM_001677    | ATPase, Na <sup>+</sup> /K <sup>+</sup> transporting, beta 1 polypeptide            | -0.64 | 2.30E-03 |
| <b>FBXO21</b>   | NM_033624    | F-box protein 21                                                                    | -0.65 | 1.44E-03 |
| <b>PKP4</b>     | NM_001005476 | plakophilin 4                                                                       | -0.65 | 1.51E-03 |
| <b>CES2</b>     | NR_036684    | carboxylesterase 2                                                                  | -0.65 | 2.95E-03 |
| <b>TLN2</b>     | NM_015059    | talin 2                                                                             | -0.65 | 1.91E-03 |
| <b>SLC25A44</b> | NR_104412    | solute carrier family 25, member 44                                                 | -0.65 | 3.30E-03 |
| <b>CKMT2</b>    | NM_001099735 | creatine kinase, mitochondrial 2 (sarcomeric)                                       | -0.65 | 1.43E-02 |
| <b>MGAM</b>     | NM_004668    | maltase-glucoamylase (alpha-glucosidase)                                            | -0.66 | 8.76E-03 |
| <b>CYP17A1</b>  | NM_000102    | cytochrome P450, family 17, subfamily A, polypeptide 1                              | -0.66 | 2.67E-02 |
| <b>GPR137B</b>  | NM_003272    | G protein-coupled receptor 137B                                                     | -0.66 | 3.07E-02 |
| <b>SDC1</b>     | NM_001006946 | syndecan 1                                                                          | -0.66 | 2.04E-02 |
| <b>SLIT2</b>    | NM_001289135 | slit homolog 2 (Drosophila)                                                         | -0.66 | 1.36E-03 |
| <b>GABRB3</b>   | NM_001191321 | gamma-aminobutyric acid (GABA) A receptor, beta 3                                   | -0.66 | 1.91E-02 |
| <b>TCP1</b>     | NM_001008897 | t-complex 1                                                                         | -0.66 | 1.77E-02 |
| <b>TRIM15</b>   | NM_033229    | tripartite motif containing 15                                                      | -0.66 | 8.17E-04 |
| <b>ENPEP</b>    | NM_001977    | glutamyl aminopeptidase (aminopeptidase A)                                          | -0.66 | 2.56E-02 |

|                 |              |                                                                                                       |       |          |
|-----------------|--------------|-------------------------------------------------------------------------------------------------------|-------|----------|
| <b>TNFRSF21</b> | NM_014452    | tumor necrosis factor receptor superfamily, member 21                                                 | -0.67 | 2.53E-03 |
| <b>CCNG1</b>    | NM_199246    | cyclin G1                                                                                             | -0.67 | 2.04E-02 |
| <b>FECH</b>     | NM_001012515 | ferrochelatase                                                                                        | -0.67 | 4.43E-03 |
| <b>ARSF</b>     | NM_001201539 | arylsulfatase F                                                                                       | -0.67 | 3.70E-02 |
| <b>TMPRSS2</b>  | NM_001135099 | transmembrane protease, serine 2                                                                      | -0.67 | 5.67E-04 |
| <b>LRRC6</b>    | NR_073525    | leucine rich repeat containing 6                                                                      | -0.67 | 6.60E-03 |
| <b>NDUFB5</b>   | NM_001199957 | NADH dehydrogenase (ubiquinone) 1 beta subcomplex, 5, 16kDa                                           | -0.68 | 1.55E-02 |
| <b>HRG</b>      | NM_000412    | histidine-rich glycoprotein                                                                           | -0.68 | 2.18E-03 |
| <b>KCNJ1</b>    | NM_000220    | potassium inwardly-rectifying channel, subfamily J, member 1                                          | -0.68 | 2.04E-02 |
| <b>UQCRC2</b>   | NM_003366    | ubiquinol-cytochrome c reductase core protein II                                                      | -0.68 | 3.98E-02 |
| <b>CYFIP2</b>   | NM_014376    | cytoplasmic FMR1 interacting protein 2                                                                | -0.69 | 9.44E-03 |
| <b>PRDX6</b>    | NM_004905    | peroxiredoxin 6                                                                                       | -0.69 | 1.36E-02 |
| <b>TDP2</b>     | NM_016614    | tyrosyl-DNA phosphodiesterase 2                                                                       | -0.69 | 5.57E-03 |
| <b>LRPPRC</b>   | NM_133259    | leucine-rich pentatricopeptide repeat containing                                                      | -0.69 | 3.57E-02 |
| <b>GSR</b>      | NM_001195103 | glutathione reductase                                                                                 | -0.69 | 8.52E-03 |
| <b>CUBN</b>     | NM_001081    | cubilin (intrinsic factor-cobalamin receptor)                                                         | -0.69 | 2.59E-02 |
| <b>NEDD4L</b>   | NM_001144966 | neural precursor cell expressed, developmentally down-regulated 4-like, E3 ubiquitin protein ligase   | -0.69 | 1.07E-04 |
| <b>P4HA2</b>    | NM_004199    | prolyl 4-hydroxylase, alpha polypeptide II                                                            | -0.70 | 3.04E-02 |
| <b>FMO4</b>     | NM_002022    | flavin containing monooxygenase 4                                                                     | -0.70 | 6.34E-03 |
| <b>NDUFAB1</b>  | NM_005003    | NADH dehydrogenase (ubiquinone) 1, alpha/beta subcomplex, 1, 8kDa                                     | -0.70 | 1.02E-02 |
| <b>MTHFD1</b>   | NM_005956    | methylenetetrahydrofolate dehydrogenase (NADP+ dependent) 1, methenyltetrahydrofolate cyclohydrolase, | -0.70 | 4.23E-03 |

|                 |              |                                                                                                      |       |          |
|-----------------|--------------|------------------------------------------------------------------------------------------------------|-------|----------|
|                 |              | formyltetrahydrofolate synthetase                                                                    |       |          |
| <b>CSDC2</b>    | NM_014460    | cold shock domain containing C2, RNA binding                                                         | -0.70 | 4.96E-02 |
| <b>DLAT</b>     | NM_001931    | dihydrolipoamide S-acetyltransferase                                                                 | -0.70 | 5.96E-04 |
| <b>CYB5A</b>    | NM_148923    | cytochrome b5 type A (microsomal)                                                                    | -0.71 | 6.05E-03 |
| <b>SLC7A8</b>   | NM_001267036 | solute carrier family 7 (amino acid transporter light chain, L system), member 8                     | -0.71 | 4.32E-02 |
| <b>ATP1A1</b>   | NM_001160233 | ATPase, Na <sup>+</sup> /K <sup>+</sup> transporting, alpha 1 polypeptide                            | -0.71 | 4.75E-02 |
| <b>CNPPD1</b>   | NM_015680    | cyclin Pas1/PHO80 domain containing 1                                                                | -0.71 | 4.42E-02 |
| <b>SOD1</b>     | NM_000454    | superoxide dismutase 1, soluble                                                                      | -0.71 | 9.00E-03 |
| <b>ACADL</b>    | NM_001608    | acyl-CoA dehydrogenase, long chain                                                                   | -0.71 | 1.26E-03 |
| <b>SDHC</b>     | NM_001035512 | succinate dehydrogenase complex, subunit C, integral membrane protein, 15kDa                         | -0.71 | 2.53E-02 |
| <b>ATP5A1</b>   | NM_001257334 | ATP synthase, H <sup>+</sup> transporting, mitochondrial F1 complex, alpha subunit 1, cardiac muscle | -0.71 | 2.91E-02 |
| <b>SLC22A4</b>  | NM_003059    | solute carrier family 22 (organic cation/zwitterion transporter), member 4                           | -0.71 | 3.71E-03 |
| <b>SLC30A9</b>  | NM_006345    | solute carrier family 30 (zinc transporter), member 9                                                | -0.72 | 4.01E-02 |
| <b>NFE2L1</b>   | NM_003204    | nuclear factor, erythroid 2-like 1                                                                   | -0.72 | 2.95E-02 |
| <b>RALYL</b>    | NM_001287243 | RALY RNA binding protein-like                                                                        | -0.72 | 3.66E-03 |
| <b>SORD</b>     | NM_003104    | sorbitol dehydrogenase                                                                               | -0.72 | 3.64E-02 |
| <b>METTL21B</b> | NM_015433    | methyltransferase like 21B                                                                           | -0.72 | 1.50E-02 |
| <b>ALDH1L1</b>  | NM_001270365 | aldehyde dehydrogenase 1 family, member L1                                                           | -0.72 | 4.58E-02 |
| <b>SLC16A4</b>  | NM_001201548 | solute carrier family 16, member 4                                                                   | -0.72 | 1.00E-02 |
| <b>MAPK10</b>   | NM_138982    | mitogen-activated protein kinase 10                                                                  | -0.72 | 5.20E-03 |
| <b>CALB1</b>    | NM_004929    | calbindin 1, 28kDa                                                                                   | -0.72 | 3.00E-02 |
| <b>ATP5G3</b>   | NM_001190329 | ATP synthase, H <sup>+</sup> transporting, mitochondrial Fo complex, subunit C3 (subunit 9)          | -0.73 | 1.55E-02 |
| <b>NARS</b>     | NM_004539    | asparaginyl-tRNA synthetase                                                                          | -0.73 | 1.86E-02 |

|                |              |                                                                                                                  |       |          |
|----------------|--------------|------------------------------------------------------------------------------------------------------------------|-------|----------|
| <b>ENOSF1</b>  | NM_017512    | enolase superfamily member 1                                                                                     | -0.73 | 7.17E-03 |
| <b>PEX7</b>    | NM_000288    | peroxisomal biogenesis factor 7                                                                                  | -0.73 | 3.49E-02 |
| <b>DDX1</b>    | NM_004939    | DEAD (Asp-Glu-Ala-Asp) box helicase 1                                                                            | -0.73 | 2.67E-02 |
| <b>COASY</b>   | NM_001042532 | CoA synthase                                                                                                     | -0.73 | 2.12E-02 |
| <b>PEX19</b>   | NR_036492    | peroxisomal biogenesis factor 19                                                                                 | -0.73 | 1.51E-02 |
| <b>PFN2</b>    | NM_053024    | profilin 2                                                                                                       | -0.74 | 1.15E-02 |
| <b>HOXD8</b>   | NM_001199746 | homeobox D8                                                                                                      | -0.74 | 1.26E-02 |
| <b>OAT</b>     | NM_001171814 | ornithine aminotransferase                                                                                       | -0.74 | 1.04E-02 |
| <b>AKR1C3</b>  | NM_001253908 | aldo-keto reductase family 1, member C3                                                                          | -0.74 | 3.76E-02 |
| <b>PMPCB</b>   | NM_004279    | peptidase (mitochondrial processing) beta                                                                        | -0.74 | 3.30E-02 |
| <b>CLCN5</b>   | NM_001127898 | chloride channel, voltage-sensitive 5                                                                            | -0.74 | 1.10E-02 |
| <b>FOLR1</b>   | NM_000802    | folate receptor 1 (adult)                                                                                        | -0.74 | 4.28E-02 |
| <b>ACAT1</b>   | NM_000019    | acetyl-CoA acetyltransferase 1                                                                                   | -0.75 | 2.21E-03 |
| <b>POLD3</b>   | NR_046410    | polymerase (DNA-directed), delta 3, accessory subunit                                                            | -0.75 | 6.72E-04 |
| <b>AQP1</b>    | NM_198098    | aquaporin 1 (Colton blood group)                                                                                 | -0.75 | 3.73E-03 |
| <b>SPAG5</b>   | NM_006461    | sperm associated antigen 5                                                                                       | -0.75 | 2.28E-02 |
| <b>HADHA</b>   | NM_000182    | hydroxyacyl-CoA dehydrogenase/3-ketoacyl-CoA thiolase/enoyl-CoA hydratase (trifunctional protein), alpha subunit | -0.75 | 4.03E-02 |
| <b>ACAA2</b>   | NM_006111    | acetyl-CoA acyltransferase 2                                                                                     | -0.75 | 1.91E-02 |
| <b>SLC16A2</b> | NM_006517    | solute carrier family 16, member 2 (thyroid hormone transporter)                                                 | -0.75 | 2.76E-03 |
| <b>ACADM</b>   | NM_001127328 | acyl-CoA dehydrogenase, C-4 to C-12 straight chain                                                               | -0.75 | 1.60E-02 |
| <b>PBX1</b>    | NM_001204963 | pre-B-cell leukemia homeobox 1                                                                                   | -0.75 | 3.06E-02 |
| <b>GRHPR</b>   | NM_012203    | glyoxylate reductase/hydroxypyruvate reductase                                                                   | -0.75 | 4.80E-02 |
| <b>DLD</b>     | NM_001289750 | dihydrolipoamide dehydrogenase                                                                                   | -0.75 | 1.95E-02 |
| <b>DSP</b>     | NM_004415    | desmoplakin                                                                                                      | -0.75 | 1.10E-02 |

|                  |              |                                                                   |       |          |
|------------------|--------------|-------------------------------------------------------------------|-------|----------|
| <b>RCAN2</b>     | NM_005822    | regulator of calcineurin 2                                        | -0.76 | 4.05E-02 |
| <b>SLC27A2</b>   | NM_001159629 | solute carrier family 27 (fatty acid transporter), member 2       | -0.76 | 1.31E-02 |
| <b>DIO1</b>      | NM_001039715 | deiodinase, iodothyronine, type I                                 | -0.76 | 4.37E-02 |
| <b>KNG1</b>      | NM_001102416 | kininogen 1                                                       | -0.76 | 2.04E-02 |
| <b>ZMPSTE24</b>  | NM_005857    | zinc metallopeptidase STE24                                       | -0.76 | 3.92E-02 |
| <b>FMO1</b>      | NM_001282694 | flavin containing monooxygenase 1                                 | -0.76 | 2.51E-02 |
| <b>SLC6A13</b>   | NM_001243392 | solute carrier family 6 (neurotransmitter transporter), member 13 | -0.76 | 2.44E-02 |
| <b>ICMT</b>      | NM_012405    | isoprenylcysteine carboxyl methyltransferase                      | -0.77 | 7.56E-03 |
| <b>PLCL1</b>     | NM_006226    | phospholipase C-like 1                                            | -0.77 | 2.25E-02 |
| <b>CCDC28A</b>   | NM_015439    | coiled-coil domain containing 28A                                 | -0.77 | 2.02E-02 |
| <b>GHITM</b>     | NM_014394    | growth hormone inducible transmembrane protein                    | -0.77 | 5.51E-03 |
| <b>GABARAPL1</b> | NM_031412    | GABA(A) receptor-associated protein like 1                        | -0.77 | 1.64E-02 |
| <b>NIT1</b>      | NM_001185094 | nitrilase 1                                                       | -0.77 | 2.03E-02 |
| <b>DDC</b>       | NM_001242886 | dopa decarboxylase (aromatic L-amino acid decarboxylase)          | -0.77 | 3.66E-02 |
| <b>PTPN3</b>     | NM_001145370 | protein tyrosine phosphatase, non-receptor type 3                 | -0.78 | 2.23E-02 |
| <b>ACSL1</b>     | NM_001286708 | acyl-CoA synthetase long-chain family member 1                    | -0.78 | 3.28E-04 |
| <b>SH3GL2</b>    | NM_003026    | SH3-domain GRB2-like 2                                            | -0.78 | 1.28E-03 |
| <b>GPX3</b>      | NM_002084    | glutathione peroxidase 3 (plasma)                                 | -0.79 | 1.10E-02 |
| <b>CS</b>        | NM_004077    | citrate synthase                                                  | -0.79 | 1.51E-02 |
| <b>PGRMC2</b>    | NM_006320    | progesterone receptor membrane component 2                        | -0.79 | 3.51E-02 |
| <b>VEGFA</b>     | NM_001204384 | vascular endothelial growth factor A                              | -0.79 | 4.50E-03 |
| <b>HRSP12</b>    | NM_005836    | heat-responsive protein 12                                        | -0.79 | 1.16E-02 |
| <b>CBR1</b>      | NM_001286789 | carbonyl reductase 1                                              | -0.80 | 1.80E-02 |

|                 |              |                                                                                   |       |          |
|-----------------|--------------|-----------------------------------------------------------------------------------|-------|----------|
| <b>PPP2R3A</b>  | NM_002718    | protein phosphatase 2, regulatory subunit B", alpha                               | -0.80 | 3.59E-02 |
| <b>ATP6V1E1</b> | NM_001039367 | ATPase, H+ transporting, lysosomal 31kDa, V1 subunit E1                           | -0.80 | 7.30E-03 |
| <b>PARM1</b>    | NM_015393    | prostate androgen-regulated mucin-like protein 1                                  | -0.80 | 2.02E-02 |
| <b>IPO13</b>    | NM_014652    | importin 13                                                                       | -0.80 | 2.49E-03 |
| <b>BHMT</b>     | NM_001713    | betaine--homocysteine S-methyltransferase                                         | -0.81 | 6.59E-03 |
| <b>GLB1L2</b>   | NM_138342    | galactosidase, beta 1-like 2                                                      | -0.81 | 1.08E-02 |
| <b>IDH1</b>     | NM_001282386 | isocitrate dehydrogenase 1 (NADP+), soluble                                       | -0.81 | 2.68E-02 |
| <b>ACOT13</b>   | NM_001160094 | acyl-CoA thioesterase 13                                                          | -0.81 | 1.03E-02 |
| <b>SLC17A3</b>  | NM_001098486 | solute carrier family 17 (organic anion transporter), member 3                    | -0.81 | 1.80E-02 |
| <b>SLC4A4</b>   | NM_001098484 | solute carrier family 4 (sodium bicarbonate cotransporter), member 4              | -0.81 | 4.83E-02 |
| <b>PGRMC1</b>   | NM_006667    | progesterone receptor membrane component 1                                        | -0.82 | 1.57E-03 |
| <b>LARS2</b>    | NM_015340    | leucyl-tRNA synthetase 2, mitochondrial                                           | -0.82 | 2.41E-02 |
| <b>IMPA2</b>    | NM_014214    | inositol(myo)-1(or 4)-monophosphatase 2                                           | -0.82 | 4.62E-02 |
| <b>MLEC</b>     | NM_014730    | malectin                                                                          | -0.82 | 4.33E-02 |
| <b>UNC13B</b>   | NM_006377    | unc-13 homolog B (C. elegans)                                                     | -0.82 | 7.40E-03 |
| <b>AIFM1</b>    | NM_004208    | apoptosis-inducing factor, mitochondrion-associated, 1                            | -0.83 | 8.99E-03 |
| <b>NDUFS2</b>   | NM_001166159 | NADH dehydrogenase (ubiquinone) Fe-S protein 2, 49kDa (NADH-coenzyme Q reductase) | -0.83 | 2.53E-02 |
| <b>ALB</b>      | NM_000477    | albumin                                                                           | -0.84 | 1.33E-02 |
| <b>ALDH5A1</b>  | NM_001080    | aldehyde dehydrogenase 5 family, member A1                                        | -0.84 | 1.86E-02 |
| <b>MINPP1</b>   | NM_001178117 | multiple inositol-polyphosphate phosphatase 1                                     | -0.84 | 2.94E-02 |
| <b>SERPINI1</b> | NM_001122752 | serpin peptidase inhibitor, clade I (neuroserpin), member 1                       | -0.84 | 1.63E-02 |
| <b>INADL</b>    | NM_176877    | InaD-like (Drosophila)                                                            | -0.84 | 1.80E-02 |

|                |              |                                                                           |       |          |
|----------------|--------------|---------------------------------------------------------------------------|-------|----------|
| <b>STAU1</b>   | NM_017454    | staufen double-stranded RNA binding protein 1                             | -0.84 | 1.73E-03 |
| <b>PLS1</b>    | NM_001145319 | plastin 1                                                                 | -0.84 | 2.25E-02 |
| <b>EHHADH</b>  | NM_001966    | enoyl-CoA, hydratase/3-hydroxyacyl CoA dehydrogenase                      | -0.84 | 2.86E-02 |
| <b>GSTA3</b>   | NM_000847    | glutathione S-transferase alpha 3                                         | -0.85 | 3.82E-02 |
| <b>XPO7</b>    | NM_015024    | exportin 7                                                                | -0.85 | 4.71E-02 |
| <b>APOM</b>    | NR_045828    | apolipoprotein M                                                          | -0.85 | 2.04E-02 |
| <b>EPS8</b>    | NM_004447    | epidermal growth factor receptor pathway substrate 8                      | -0.85 | 3.88E-02 |
| <b>SEPHS2</b>  | NM_012248    | selenophosphate synthetase 2                                              | -0.85 | 2.75E-02 |
| <b>DPP4</b>    | NM_001935    | dipeptidyl-peptidase 4                                                    | -0.86 | 5.25E-03 |
| <b>CRHBP</b>   | NM_001882    | corticotropin releasing hormone binding protein                           | -0.86 | 1.13E-02 |
| <b>ODC1</b>    | NM_002539    | ornithine decarboxylase 1                                                 | -0.86 | 1.33E-02 |
| <b>PEBP1</b>   | NM_002567    | phosphatidylethanolamine binding protein 1                                | -0.86 | 3.20E-03 |
| <b>MSMO1</b>   | NM_006745    | methylsterol monooxygenase 1                                              | -0.86 | 3.98E-02 |
| <b>SLC22A5</b> | NM_003060    | solute carrier family 22 (organic cation/carnitine transporter), member 5 | -0.86 | 2.20E-02 |
| <b>LDHB</b>    | NM_002300    | lactate dehydrogenase B                                                   | -0.86 | 4.01E-03 |
| <b>CYP4F2</b>  | NM_001082    | cytochrome P450, family 4, subfamily F, polypeptide 2                     | -0.86 | 2.13E-02 |
| <b>TM7SF2</b>  | NM_003273    | transmembrane 7 superfamily member 2                                      | -0.87 | 4.55E-02 |
| <b>TMBIM6</b>  | NM_003217    | transmembrane BAX inhibitor motif containing 6                            | -0.87 | 1.80E-02 |
| <b>ECHS1</b>   | NM_004092    | enoyl CoA hydratase, short chain, 1, mitochondrial                        | -0.87 | 2.32E-02 |
| <b>HIBCH</b>   | NM_198047    | 3-hydroxyisobutyryl-CoA hydrolase                                         | -0.87 | 2.08E-02 |
| <b>CRYZ</b>    | NM_001130042 | crystallin, zeta (quinone reductase)                                      | -0.87 | 9.99E-03 |
| <b>GOT2</b>    | NM_001286220 | glutamic-oxaloacetic transaminase 2, mitochondrial                        | -0.87 | 4.37E-02 |

|                 |              |                                                                               |       |          |
|-----------------|--------------|-------------------------------------------------------------------------------|-------|----------|
| <b>SCP2</b>     | NM_001007099 | sterol carrier protein 2                                                      | -0.88 | 1.43E-02 |
| <b>AHCY</b>     | NM_001161766 | adenosylhomocysteinase                                                        | -0.88 | 4.83E-02 |
| <b>ACOX2</b>    | NM_003500    | acyl-CoA oxidase 2, branched chain                                            | -0.88 | 7.43E-03 |
| <b>PEPD</b>     | NM_001166056 | peptidase D                                                                   | -0.88 | 3.40E-02 |
| <b>PLOD1</b>    | NM_000302    | procollagen-lysine, 2-oxoglutarate 5-dioxygenase 1                            | -0.88 | 3.20E-02 |
| <b>IVD</b>      | NM_001159508 | isovaleryl-CoA dehydrogenase                                                  | -0.88 | 4.68E-03 |
| <b>DZIP1</b>    | NM_014934    | DAZ interacting zinc finger protein 1                                         | -0.88 | 2.39E-02 |
| <b>NIPSNAP1</b> | NM_001202502 | nipsnap homolog 1 (C. elegans)                                                | -0.88 | 2.50E-02 |
| <b>SLC25A3</b>  | NM_213611    | solute carrier family 25 (mitochondrial carrier; phosphate carrier), member 3 | -0.89 | 4.66E-03 |
| <b>HYAL1</b>    | NM_153282    | hyaluronoglucosaminidase 1                                                    | -0.89 | 3.66E-03 |
| <b>IARS2</b>    | NM_018060    | isoleucyl-tRNA synthetase 2, mitochondrial                                    | -0.89 | 1.14E-02 |
| <b>FAH</b>      | NM_000137    | fumarylacetoacetate hydrolase (fumarylacetoacetase)                           | -0.89 | 1.28E-02 |
| <b>PHYH</b>     | NM_006214    | phytanoyl-CoA 2-hydroxylase                                                   | -0.89 | 2.11E-04 |
| <b>SPR</b>      | NM_003124    | sepiapterin reductase (7,8-dihydrobiopterin:NADP+ oxidoreductase)             | -0.89 | 3.38E-02 |
| <b>AUH</b>      | NM_001698    | AU RNA binding protein/enoyl-CoA hydratase                                    | -0.89 | 1.27E-02 |
| <b>DAO</b>      | NM_001917    | D-amino-acid oxidase                                                          | -0.89 | 4.08E-02 |
| <b>KCNJ15</b>   | NM_001276439 | potassium inwardly-rectifying channel, subfamily J, member 15                 | -0.89 | 1.26E-02 |
| <b>PKLR</b>     | NM_000298    | pyruvate kinase, liver and RBC                                                | -0.89 | 2.26E-02 |
| <b>PLG</b>      | NM_001168338 | plasminogen                                                                   | -0.90 | 2.53E-02 |
| <b>ACO2</b>     | NM_001098    | aconitase 2, mitochondrial                                                    | -0.90 | 3.59E-02 |
| <b>MAOA</b>     | NM_000240    | monoamine oxidase A                                                           | -0.90 | 2.10E-02 |
| <b>COX11</b>    | NR_027941    | cytochrome c oxidase assembly homolog 11 (yeast)                              | -0.90 | 4.50E-03 |
| <b>DECR1</b>    | NM_001359    | 2,4-dienoyl CoA reductase 1, mitochondrial                                    | -0.91 | 1.08E-02 |

|                |              |                                                                                                         |       |          |
|----------------|--------------|---------------------------------------------------------------------------------------------------------|-------|----------|
| <b>ISCA1</b>   | NM_030940    | iron-sulfur cluster assembly 1                                                                          | -0.91 | 4.09E-02 |
| <b>SLC1A1</b>  | NM_004170    | solute carrier family 1 (neuronal/epithelial high affinity glutamate transporter, system Xag), member 1 | -0.92 | 4.26E-02 |
| <b>SLC25A1</b> | NM_005984    | solute carrier family 25 (mitochondrial carrier; citrate transporter), member 1                         | -0.92 | 4.91E-02 |
| <b>ALDH7A1</b> | NM_001182    | aldehyde dehydrogenase 7 family, member A1                                                              | -0.92 | 7.76E-03 |
| <b>SHMT1</b>   | NM_001281786 | serine hydroxymethyltransferase 1 (soluble)                                                             | -0.92 | 3.87E-02 |
| <b>GRB10</b>   | NM_005311    | growth factor receptor-bound protein 10                                                                 | -0.92 | 1.40E-02 |
| <b>TOM1L1</b>  | NM_005486    | target of myb1 (chicken)-like 1                                                                         | -0.92 | 1.05E-02 |
| <b>GPR116</b>  | NM_001098518 | G protein-coupled receptor 116                                                                          | -0.92 | 2.04E-02 |
| <b>ADD3</b>    | NM_016824    | adducin 3 (gamma)                                                                                       | -0.92 | 3.81E-02 |
| <b>SLC22A6</b> | NM_153277    | solute carrier family 22 (organic anion transporter), member 6                                          | -0.93 | 4.62E-02 |
| <b>GLYAT</b>   | NM_005838    | glycine-N-acyltransferase                                                                               | -0.93 | 3.20E-02 |
| <b>MICU1</b>   | NM_001195519 | mitochondrial calcium uptake 1                                                                          | -0.93 | 2.75E-02 |
| <b>GNPDA1</b>  | NM_005471    | glucosamine-6-phosphate deaminase 1                                                                     | -0.93 | 1.03E-02 |
| <b>DMXL1</b>   | NM_001290322 | Dmx-like 1                                                                                              | -0.94 | 2.64E-02 |
| <b>XPNPEP2</b> | NM_003399    | X-prolyl aminopeptidase (aminopeptidase P) 2, membrane-bound                                            | -0.94 | 3.87E-02 |
| <b>ESRRG</b>   | NM_001243507 | estrogen-related receptor gamma                                                                         | -0.94 | 1.27E-02 |
| <b>PDE8A</b>   | NM_173454    | phosphodiesterase 8A                                                                                    | -0.94 | 4.37E-02 |
| <b>PCBD1</b>   | NM_001289797 | pterin-4 alpha-carbinolamine dehydratase/dimerization cofactor of hepatocyte nuclear factor 1 alpha     | -0.94 | 3.58E-02 |
| <b>MME</b>     | NM_007289    | membrane metallo-endopeptidase                                                                          | -0.95 | 1.96E-02 |
| <b>PTH1R</b>   | NM_000316    | parathyroid hormone 1 receptor                                                                          | -0.95 | 2.53E-02 |
| <b>ALDH3A2</b> | NM_001031806 | aldehyde dehydrogenase 3 family, member A2                                                              | -0.95 | 5.02E-03 |
| <b>GJB1</b>    | NM_001097642 | gap junction protein, beta 1, 32kDa                                                                     | -0.95 | 4.37E-02 |
| <b>ALDH9A1</b> | NM_000696    | aldehyde dehydrogenase 9 family, member A1                                                              | -0.96 | 6.04E-03 |

|                  |              |                                                                                     |       |          |
|------------------|--------------|-------------------------------------------------------------------------------------|-------|----------|
| <b>ANKRD46</b>   | NM_198401    | ankyrin repeat domain 46                                                            | -0.96 | 3.76E-02 |
| <b>FOXI1</b>     | NM_012188    | forkhead box I1                                                                     | -0.96 | 1.57E-03 |
| <b>DPYS</b>      | NM_001385    | dihydropyrimidinase                                                                 | -0.97 | 2.77E-02 |
| <b>SLC22A2</b>   | NM_003058    | solute carrier family 22 (organic cation transporter), member 2                     | -0.97 | 1.45E-02 |
| <b>GRB14</b>     | NM_004490    | growth factor receptor-bound protein 14                                             | -0.97 | 8.79E-03 |
| <b>EPHX2</b>     | NM_001256483 | epoxide hydrolase 2, cytoplasmic                                                    | -0.97 | 1.46E-02 |
| <b>CLMN</b>      | NM_024734    | calmin (calponin-like, transmembrane)                                               | -0.98 | 1.44E-02 |
| <b>ADH5</b>      | NM_000671    | alcohol dehydrogenase 5 (class III), chi polypeptide                                | -0.98 | 1.52E-02 |
| <b>SERPINA5</b>  | NM_000624    | serpin peptidase inhibitor, clade A (alpha-1 antiproteinase, antitrypsin), member 5 | -0.99 | 6.42E-03 |
| <b>AZGP1</b>     | NM_001185    | alpha-2-glycoprotein 1, zinc-binding                                                | -0.99 | 2.78E-02 |
| <b>HMGCL</b>     | NM_001166059 | 3-hydroxymethyl-3-methylglutaryl-CoA lyase                                          | -0.99 | 3.49E-02 |
| <b>HADH</b>      | NM_001184705 | hydroxyacyl-CoA dehydrogenase                                                       | -0.99 | 1.14E-02 |
| <b>SETD3</b>     | NM_032233    | SET domain containing 3                                                             | -0.99 | 2.46E-02 |
| <b>FBP1</b>      | NM_001127628 | fructose-1,6-bisphosphatase 1                                                       | -0.99 | 4.96E-02 |
| <b>PGM1</b>      | NM_002633    | phosphoglucomutase 1                                                                | -0.99 | 3.97E-02 |
| <b>RAB11FIP5</b> | NM_015470    | RAB11 family interacting protein 5 (class I)                                        | -1.00 | 1.21E-02 |
| <b>SLC17A1</b>   | NM_005074    | solute carrier family 17 (organic anion transporter), member 1                      | -1.00 | 4.25E-02 |
| <b>NQO2</b>      | NM_000904    | NAD(P)H dehydrogenase, quinone 2                                                    | -1.00 | 4.59E-02 |
| <b>MXI1</b>      | NM_005962    | MAX interactor 1, dimerization protein                                              | -1.01 | 1.97E-02 |
| <b>MAP7</b>      | NM_001198611 | microtubule-associated protein 7                                                    | -1.01 | 1.37E-02 |
| <b>MTX2</b>      | NR_027850    | metaxin 2                                                                           | -1.02 | 3.36E-02 |
| <b>AFG3L2</b>    | NM_006796    | AFG3-like AAA ATPase 2                                                              | -1.02 | 2.35E-02 |
| <b>COBL</b>      | NM_001287436 | cordon-bleu WH2 repeat protein                                                      | -1.03 | 3.43E-02 |
| <b>GLDC</b>      | NM_000170    | glycine dehydrogenase (decarboxylating)                                             | -1.04 | 3.63E-02 |
| <b>ASPA</b>      | NM_001128085 | aspartoacylase                                                                      | -1.04 | 1.33E-02 |

|                |              |                                                                                                                 |       |          |
|----------------|--------------|-----------------------------------------------------------------------------------------------------------------|-------|----------|
| <b>EFHD1</b>   | NM_025202    | EF-hand domain family, member D1                                                                                | -1.04 | 1.78E-02 |
| <b>ABCC2</b>   | NM_000392    | ATP-binding cassette, sub-family C (CFTR/MRP), member 2                                                         | -1.05 | 1.54E-02 |
| <b>MUT</b>     | NM_000255    | methylmalonyl CoA mutase                                                                                        | -1.07 | 4.23E-02 |
| <b>ALDH2</b>   | NM_001204889 | aldehyde dehydrogenase 2 family (mitochondrial)                                                                 | -1.08 | 2.53E-02 |
| <b>CA12</b>    | NM_206925    | carbonic anhydrase XII                                                                                          | -1.08 | 5.45E-03 |
| <b>CA2</b>     | NM_001293675 | 0                                                                                                               | -1.09 | 1.21E-02 |
| <b>MIPEP</b>   | NM_005932    | mitochondrial intermediate peptidase                                                                            | -1.09 | 7.31E-03 |
| <b>SULT1C2</b> | NM_176825    | sulfotransferase family, cytosolic, 1C, member 2                                                                | -1.09 | 3.71E-03 |
| <b>ACADSB</b>  | NM_001609    | acyl-CoA dehydrogenase, short/branched chain                                                                    | -1.09 | 9.90E-03 |
| <b>HADHB</b>   | NM_001281512 | hydroxyacyl-CoA dehydrogenase/3-ketoacyl-CoA thiolase/enoyl-CoA hydratase (trifunctional protein), beta subunit | -1.10 | 2.56E-03 |
| <b>CTH</b>     | NM_153742    | cystathionase (cystathionine gamma-lyase)                                                                       | -1.10 | 2.19E-02 |
| <b>HSPA4L</b>  | NM_014278    | heat shock 70kDa protein 4-like                                                                                 | -1.10 | 2.05E-02 |
| <b>EPHX1</b>   | NM_001291163 | epoxide hydrolase 1, microsomal (xenobiotic)                                                                    | -1.11 | 2.70E-02 |
| <b>GOT1</b>    | NM_002079    | glutamic-oxaloacetic transaminase 1, soluble                                                                    | -1.11 | 1.46E-02 |
| <b>NINL</b>    | NM_025176    | ninein-like                                                                                                     | -1.11 | 3.38E-02 |
| <b>BCKDHB</b>  | NM_000056    | branched chain keto acid dehydrogenase E1, beta polypeptide                                                     | -1.13 | 1.98E-02 |
| <b>PNP</b>     | NM_000270    | purine nucleoside phosphorylase                                                                                 | -1.14 | 1.59E-02 |
| <b>ETFDH</b>   | NM_001281738 | electron-transferring-flavoprotein dehydrogenase                                                                | -1.16 | 7.75E-04 |
| <b>HPN</b>     | NM_182983    | hepsin                                                                                                          | -1.17 | 4.53E-02 |
| <b>AFM</b>     | NM_001133    | afamin                                                                                                          | -1.17 | 4.33E-02 |
| <b>ENTPD5</b>  | NM_001249    | ectonucleoside triphosphate diphosphohydrolase 5                                                                | -1.18 | 1.87E-02 |
| <b>GPD1L</b>   | NM_015141    | glycerol-3-phosphate dehydrogenase 1-like                                                                       | -1.21 | 1.05E-02 |

|                |           |                                          |       |          |
|----------------|-----------|------------------------------------------|-------|----------|
| <b>ACAA1</b>   | NM_001607 | acetyl-CoA acyltransferase 1             | -1.22 | 1.29E-02 |
| <b>HSD11B2</b> | NM_000196 | hydroxysteroid (11-beta) dehydrogenase 2 | -1.24 | 4.28E-02 |

\* Meta-Effect-Size: Hedges' g, which estimates the mean difference between AR and NAR group.

**Table S3. Summary of the downstream genes and out/in-degrees of the 14 key driver genes in the differential modules of rejection (M1, M3, M4, M8, M10)**

| Symbol | Downstream genes                                                                                                                                                                                                                                                                                                                                                                                                                                                                                                                                                                                                                                                                                                                                                                                                                           | Downstream count | Out_degrees | In_degrees | Type   | Module |
|--------|--------------------------------------------------------------------------------------------------------------------------------------------------------------------------------------------------------------------------------------------------------------------------------------------------------------------------------------------------------------------------------------------------------------------------------------------------------------------------------------------------------------------------------------------------------------------------------------------------------------------------------------------------------------------------------------------------------------------------------------------------------------------------------------------------------------------------------------------|------------------|-------------|------------|--------|--------|
| CASP1  | APOL1;BTN3A3;TLR2;ST3GAL5;SYT11;EVI2A;SP110;CYBB;RAS SF2;STAT4;MYD88;P2RY14;CXCL9;VOPP1;CLIC2;KLRB1;GPR183;CTSS;IRF8;RNASE6;UBD;IFNAR2;LCP2;HLA-E;CXCR4;RAB31;BTN3A2;ARHGDI B;CSF1R;BTN3A1;CLEC2B;DOCK10;CD69;AIM2;CD52;ADAMDEC1;CD38;CD53;CD96;GPR18;EVI2B;F13A1;HLA-DPB1;ARPC2;FYB;IKZF1;CD226;CD48;IL7R;ALOX5AP;FPR3;CCR2;FCGR2A;CD4;GMFG;HLA-DPA1;FAM49A;FAM65B;ARL4C;BASP1;CD44;PLXNC1;ITK;GPR65;LHFPL2;HLA-F;KIAA0922;LCP1;MAN2B1;C1QB;LAMP3;GZMA;PTPRC;DDB2;RTN1;EZH2;PIK3CG;NELL2;HLA-DOB;SP140;CD3E;GCNT1;PTPN6;TNFAIP3;DNMT1;IFITM1;TBXAS1;SELL;UCP2;STAT1;FLI1;LYZ;HCLS1;GPR171;FCGR2B;PTPN22;HLA-DRA;MNDA;SLA;LAPTM5;XPO6;NCKAP1L;ICOS;SERPINB9;VNN2;UBA7;SH2B3;TRIM22;6-Sep;APOBEC3C;APOBEC3G;ARHGAP25;CD84;C2;CELF2;ELMO1;CARD8;ADRB2;ENTPD1;LMNB1;P2RY10;PRKCH;SRGN;PIP4K2A;FOLR2;PRKCB;LPXN;RGS1;TNFSF8;MTHFD2;RGS10;KLRG1 | 132              | 26          | 2          | global | M1     |
| EVI2A  | CD69;DOCK10;CD52;ADAMDEC1;CTSS;AIM2;CLEC2B;PLXNC1;EVI2B;GPR171;PTPN22;MNDA;HLA-F;FAM65B;HCLS1;HLA-DRA;PIK3CG;LCP2;IL7R;GPR65;GZMA;FCGR2B;PTPRC;ARPC2;APOBEC3G;BTN3A1;CSF1R;ARHGDI B;BTN3A3;CYBB;CD53;CELF2;ELMO1;CD96;CARD8;GMFG;BASP1;EZH2;FCGR2A;GPR18;ALOX5AP;ADRB2;FPR3;CD48;CD4;CXCR4;ARL4C;ENTPD1;BTN3A                                                                                                                                                                                                                                                                                                                                                                                                                                                                                                                              | 130              | 23          | 2          | local  | M1     |

|        |                                                                                                                                                                                                                                                                                                                                                                                                                                                                                                                                                                                                                                                                                                                                                                                        |     |    |   |       |    |
|--------|----------------------------------------------------------------------------------------------------------------------------------------------------------------------------------------------------------------------------------------------------------------------------------------------------------------------------------------------------------------------------------------------------------------------------------------------------------------------------------------------------------------------------------------------------------------------------------------------------------------------------------------------------------------------------------------------------------------------------------------------------------------------------------------|-----|----|---|-------|----|
|        | 2;GPR183;CD3E;CCR2;FYB;CD226;CLIC2;F13A1;HLA-E;LAPTM5;LCP1;ITK;P2RY10;ICOS;SP140;RTN1;ST3GAL5;TLR2;SP110;NCKAP1L;C1QB;CXCL9;STAT4;APOL1;CD38;RASSF2;STAT1;LAMP3;LPXN;P2RY14;SERPINB9;RGS1;TRIM22;SRGN;TBXAS1;LHFPL2;PTPN6;MTHFD2;RAB31;SELL;NELL2;IFNAR2;SYT11;KLRG1;UBD;HLA-DPB1;KLRB1;RNASE6;TNFSF8;SLA;LYZ;VNN2;MYD88;RGS10;6-Sep;APOBEC3C;ARHGAP25;CD84;CD44;C2;GCNT1;FLI1;HLA-DPA1;LMNB1;FAM49A;MAN2B1;KIAA0922;FOLR2;DDB2;IKZF1;IRF8;PRKCH;HLA-DOB;PIP4K2A;IFITM1;PRKCB;UCP2;XPO6;SH2B3;UBA7;TNFAIP3;DNMT1                                                                                                                                                                                                                                                                       |     |    |   |       |    |
| MNDA   | F13A1;ALOX5AP;FYB;CD53;EZH2;CLEC2B;CCR2;LCP1;HLA-E;HLA-F;ARL4C;ITK;HCLS1;LAPTM5;MYD88;P2RY14;SP110;RTN1;RGS10;TLR2;ST3GAL5;CD4;ARPC2;ARHGDIB;ARHGAP25;CD38;C2;DOCK10;CD52;CXCR4;CELF2;ELMO1;BTN3A2;CYBB;ENTPD1;FCGR2B;GPR18;CD96;EVI2B;HLA-DPB1;CD3E;ADAMDEC1;GPR171;CD226;CSF1R;GCNT1;BTN3A3;CARD8;HLA-DPA1;FLI1;CD48;CXCL9;HLA-DRA;CTSS;GMFG;IFNAR2;FAM49A;CLIC2;FOLR2;GZMA;C1QB;DDB2;PIK3CG;IRF8;RASSF2;GPR183;NELL2;SELL;UBD;PRKCB;SLA;TRIM22;SRGN;LMNB1;FPR3;FCGR2A;PTPRC;STAT1;KLRB1;LHFPL2;TNFSF8;KLRG1;SERPINB9;ICOS;RNASE6;IFITM1;RAB31;LAMP3;NCKAP1L;XPO6;P2RY10;UCP2;PRKCH;PLXNC1;MTHFD2;UBA7;SH2B3;PTPN6;BTN3A1;APOBEC3C;APOBEC3G;CD44;CD84;ADRB2;CD69;APOL1;IKZF1;IL7R;6-Sep;BASP1;MAN2B1;KIAA0922;FAM65B;GPR65;LCP2;SP140;TBXAS1;PIP4K2A;SYT11;PTPN22;LYZ;RGS1;LPXN;VNN2 | 124 | 21 | 3 | local | M1 |
| RASSF2 | CD4;LAMP3;MAN2B1;ARL4C;C1QB;ARPC2;HLA-E;LHFPL2;CD44;KIAA0922;BASP1;GZMA;LCP1;ARHGDIB;GPR65;FAM65B;ITK;PLXNC1;CXCL9;EVI2B;HLA-                                                                                                                                                                                                                                                                                                                                                                                                                                                                                                                                                                                                                                                          | 120 | 24 | 7 | local | M1 |

|       |                                                                                                                                                                                                                                                                                                                                                                                                                                                                                                                                                                                                                                                                     |     |    |   |       |    |
|-------|---------------------------------------------------------------------------------------------------------------------------------------------------------------------------------------------------------------------------------------------------------------------------------------------------------------------------------------------------------------------------------------------------------------------------------------------------------------------------------------------------------------------------------------------------------------------------------------------------------------------------------------------------------------------|-----|----|---|-------|----|
|       | F;RTN1;SH2B3;TRIM22;APOBEC3C;BTN3A1;CD3E;CLEC2B;CYBB;BTN3A3;CELF2;CD69;CD53;CTSS;EZH2;CARD8;FCGR2A;GMFG;CD48;GPR171;ADRB2;FPR3;GPR18;ALOX5AP;CD38;HLA-DPB1;F13A1;CD96;CCR2;ARHGAP25;FYB;ADAMDEC1;CD226;CXCR4;DOCK10;ICOS;FLI1;CD52;HLA-DRA;HLA-DPA1;LAPTM5;DDB2;LCP2;HCLS1;APOL1;STAT1;SRGN;CSF1R;KLRB1;GPR183;PIP4K2A;TBXAS1;SELL;SP110;IFITM1;FOLR2;C2;RNASE6;P2RY14;UCP2;UBD;RAB31;MTHFD2;KLRG1;IFNAR2;SP140;SYT11;TLR2;P2RY10;XPO6;SLA;NCKAP1L;PRKCH;LMNB1;PTPRC;RGS10;UBA7;PTPN6;6-Sep;BTN3A2;APOBEC3G;CD84;ELMO1;FCGR2B;ENTPD1;IL7R;GCNT1;CLIC2;FAM49A;NELL2;IKZF1;LYZ;PIK3CG;PRKCB;LPXN;RGS1;SERPINB9;PTPN22;TNFSF8;VNN2                                     |     |    |   |       |    |
| LCP1  | FLI1;CARD8;HLA-DRA;FYB;CYBB;CELF2;CD53;CD52;CD48;CXCL9;CD38;CD4;LAPTM5;HLA-DPA1;PTPRC;PLXNC1;RGS10;MTHFD2;NCKAP1L;PRKCH;CD3E;BTN3A1;ALOX5AP;APOBEC3G;ARPC2;ARHGDIB;ARHGAP25;CLEC2B;CTSS;ELMO1;DOCK10;APOL1;GPR183;GMFG;BTN3A3;C2;CSF1R;GCNT1;CD69;LMNB1;HCLS1;CD96;6-Sep;CLIC2;FOLR2;RNASE6;KLRB1;TLR2;SELL;SLA;ITK;PRKCB;UBD;PIK3CG;P2RY14;HLA-F;UCP2;STAT1;GZMA;LCP2;FCGR2A;RAB31;LYZ;FPR3;SP110;HLA-DPB1;BTN3A2;CD44;CD226;CD84;CCR2;CXCR4;F13A1;GPR18;GPR171;ADRB2;FCGR2B;ENTPD1;ARL4C;ADAMDEC1;IL7R;FAM49A;NELL2;LAMP3;P2RY10;ICOS;DDB2;PTPN6;SYT11;IKZF1;TBXAS1;PIP4K2A;SRGN;RGS1;LPXN;SERPINB9;SP140;PTPN22;EZH2;TNFSF8;TRIM22;LHFPL2;XPO6;KLRG1;VNN2;IFNAR2 | 106 | 20 | 7 | local | M1 |
| GPR65 | BASP1;CARD8;CTSS;EZH2;FCGR2A;GMFG;UBD;IFNAR2;LCP2;TLR2;SP140;HLA-F;PLXNC1;KLRG1;SP110;P2RY10;SYT11;HLA-DPB1;BTN3A1;CSF1R;ARHGDIB;CLEC2B;CD53;F13A1;CXCL9;C                                                                                                                                                                                                                                                                                                                                                                                                                                                                                                          | 105 | 18 | 5 | local | M1 |

|       |                                                                                                                                                                                                                                                                                                                                                                                                                                                                                                |    |    |   |        |    |
|-------|------------------------------------------------------------------------------------------------------------------------------------------------------------------------------------------------------------------------------------------------------------------------------------------------------------------------------------------------------------------------------------------------------------------------------------------------------------------------------------------------|----|----|---|--------|----|
|       | D52;CD48;GPR18;ARPC2;DOCK10;APOL1;CYBB;CCR2;CD96;BTN3A2;FYB;CD226;CXCR4;CLIC2;ICOS;HCLS1;DDB2;CD38;IKZF1;GCNT1;PTPN6;LAMP3;CD3E;LHFPL2;SELL;TBXAS1;LMNB1;GZMA;RGS10;MTHFD2;KLRB1;XPO6;IL7R;NELL2;RNASE6;VNN2;RAB31;PTPRC;TRIM22;6-Sep;ALOX5AP;APOBEC3G;CD4;ARHGAP25;CD44;CD84;BTN3A3;C2;ELMO1;GPR171;ADRB2;FPR3;CD69;CELF2;ARL4C;FCGR2B;ENTPD1;GPR183;ADAMDEC1;FOLR2;LYZ;SRGN;PIP4K2A;LAPTM5;STAT1;FAM49A;P2RY14;PRKCH;NCKAP1L;PIK3CG;ITK;PRKCB;SLA;TNFSF8;PTPN22;UCP2;FLI1;SERPINB9;LPXN;RGS1 |    |    |   |        |    |
| MYO1F | LILRB2;CLEC10A;CSTA;IGSF6;CSF3R;ADCY7;HCK;ADA;CD97;SELPLG;TRAF1;SECTM1;SLC2A3;RGS19;NCF2;BID;CD180;CD300A;CD40;AOAH;BCL2A1;CD33;BATF;DOCK2;EGR2;GNA15;CMKLR1;CD37;GZMB;FMNL1;LAIR1;CFP;ICAM1;ITGB2;LY86;ITGAM;NCF4;CTSW;IL2RG;IL1B;JUNB;DUSP5;RAC2;LSP1;SASH3;HSPA6;VAV1;HHEX;PLAUR;STK10;RHOG;TCIRG1;TNF;ALOX5;CCR1;CXCR3;ELF4;INPP5D;CXCR6;NLRP3;RHOH;PTAFR;PLCB2;PTPRE;STAT5A                                                                                                               | 65 | 15 | 2 | global | M3 |
| HCK   | DOCK2;CSF3R;CD180;BID;BATF;ADA;CD33;LILRB2;ITGB2;ICAM1;SECTM1;HHEX;VAV1;NCF4;PLAUR;LSP1;NCF2;AOAH;CD97;GNA15;CD37;CD300A;LAIR1;FMNL1;CFP;GZMB;EGR2;IL2RG;BCL2A1;CXCR3;ELF4;IGSF6;ITGAM;LY86;CD40;CCR1;CTSW;INPP5D;ALOX5;STK10;RHOH;NLRP3;CLEC10A;CSTA;RAC2;HSPA6;RHOG;STAT5A;TCIRG1;SLC2A3;SELPLG;CMKLR1;IL1B;JUNB;DUSP5;PTAFR;TRAF1;PLCB2;SASH3;PTPRE;TNF;CXCR6                                                                                                                               | 62 | 17 | 4 | local  | M3 |
| VAV1  | LILRB2;ALOX5;RHOH;DOCK2;LSP1;ITGB2;STK10;CLEC10A;GNA15;NLRP3;INPP5D;ADA;CD97;CD300A;CD37;CD33;CD180;BID;CD40;FMNL1;CFP;GZMB;LAIR1;EGR2;ELF4;CXCR3;IL2RG;BCL2A1;SELPLG;LY86;RHOG;CSTA;IGSF6;RAC2;TRAF1;HHEX;PLCB2;SASH3;PLAUR;STAT5A;NCF2;TCIRG1;AOAH;CTSW;CMKLR1;ICAM1;ITGAM;CXCR6;CCR1;SECTM1;JUNB;SLC2A3;PTPRE;PTAFR;TNF;IL1B;DUSP5                                                                                                                                                          | 57 | 15 | 5 | local  | M3 |

|        |                                                                                                                                                                                                                                  |    |    |   |        |     |
|--------|----------------------------------------------------------------------------------------------------------------------------------------------------------------------------------------------------------------------------------|----|----|---|--------|-----|
| PLEK   | FCN1;IL15RA;IDO1;CD86;EMP3;FCGR3B;KLRD1;HLA-DMB;IFIT3;IRF1;RARRES3;WARS;UBE2L6;PSME1;PLEKHO2;PSMB8;EMR2;CXCL11;CD14;CSF2RB;HCP5;B2M;CXCL10;IL10RA;IL15;MICB;IL10RB;OAS2;PSMB10;TRAFFD1;TAP2;TAP1;IFI30;TRIM21;VAMP5;PSME2;PTGER4 | 37 | 16 | 1 | global | M4  |
| PSME1  | IL10RB;CXCL10;PSMB10;PLEKHO2;IDO1;FCN1;IFIT3;CD86;PSMB8;HCP5;HLA-DMB;UBE2L6;PSME2;B2M;CSF2RB;CD14;IL15RA;MICB;CXCL11;IL10RA;EMP3;IL15;OAS2;RARRES3;IRF1;TAP1;IFI30;TAP2;KLRD1;WARS;TRIM21;EMR2;TRAFFD1;PTGER4;VAMP5              | 35 | 13 | 1 | local  | M4  |
| PSMB10 | EMP3;CD14;PLEKHO2;CXCL11;CD86;IL10RA;CXCL10;HCP5;PSMB8;UBE2L6;TRIM21;PSME2;RARRES3;WARS;B2M;CSF2RB;EMR2;FCN1;MICB;IL15RA;IL15;IFIT3;OAS2;IL10RB;HLA-DMB;TAP2;TRAFFD1;TAP1;PTGER4;IFI30;IRF1;VAMP5                                | 32 | 14 | 4 | local  | M4  |
| CRLF3  | BIRC3;CASP3;TNFAIP8;SLC20A1;MCL1;STK17B;BAZ1A;REL;CD47;MSL3                                                                                                                                                                      | 10 | 6  | 0 | global | M8  |
| CD3D   | SLAMF1;CXCL13;FAIM3;DGKA;MS4A1;CD3G;GZMK;TRAF3IP3;CD5;LY9;PRDM1                                                                                                                                                                  | 11 | 8  | 0 | global | M10 |

**Table S4. Key drivers-based gene set used for the Connectivity Map query. Meta-p-values are adjusted by FDR correction method.**

| <b>Symbol</b>  | <b>Meta-Effect Size *</b> | <b>Meta-p-value</b> | <b>Module</b> | <b>Out-degrees</b> |
|----------------|---------------------------|---------------------|---------------|--------------------|
| <b>CASP1</b>   | 1.09                      | 6.82E-05            | 1             | 132                |
| <b>RASSF2</b>  | 1.08                      | 1.14E-03            | 1             | 120                |
| <b>EVI2A</b>   | 1.18                      | 2.21E-03            | 1             | 130                |
| <b>MNDA</b>    | 0.96                      | 6.08E-05            | 1             | 124                |
| <b>LCP1</b>    | 1.16                      | 2.16E-04            | 1             | 106                |
| <b>HCLS1</b>   | 1.04                      | 8.02E-05            | 1             | 96                 |
| <b>GPR65</b>   | 1.02                      | 1.94E-05            | 1             | 105                |
| <b>AIF1</b>    | 0.73                      | 7.96E-05            | 1             | 134                |
| <b>BTK</b>     | 1.24                      | 3.98E-04            | 1             | 133                |
| <b>IRF8</b>    | 1.12                      | 2.09E-06            | 1             | 121                |
| <b>HLA-E</b>   | 0.88                      | 1.27E-03            | 1             | 112                |
| <b>LY96</b>    | 1.03                      | 4.19E-03            | 1             | 134                |
| <b>AIM2</b>    | 1.13                      | 1.40E-06            | 1             | 129                |
| <b>GMFG</b>    | 1.12                      | 6.72E-04            | 1             | 102                |
| <b>STAT4</b>   | 1.08                      | 5.54E-06            | 1             | 128                |
| <b>C1QB</b>    | 0.91                      | 2.91E-04            | 1             | 114                |
| <b>ITK</b>     | 1.16                      | 2.85E-03            | 1             | 79                 |
| <b>MAN2B1</b>  | 0.63                      | 1.14E-02            | 1             | 116                |
| <b>EVI2B</b>   | 0.98                      | 1.12E-03            | 1             | 110                |
| <b>VOPP1</b>   | 0.91                      | 1.93E-03            | 1             | 127                |
| <b>TNFAIP3</b> | 1.23                      | 2.98E-04            | 1             | 126                |
| <b>MYD88</b>   | 0.64                      | 1.00E-02            | 1             | 118                |
| <b>HCK</b>     | 1.14                      | 1.36E-06            | 3             | 17                 |
| <b>MYO1F</b>   | 1.16                      | 1.36E-06            | 3             | 15                 |
| <b>VAV1</b>    | 0.97                      | 3.56E-05            | 3             | 15                 |
| <b>IGSF6</b>   | 1.14                      | 7.55E-04            | 3             | 10                 |
| <b>NCF4</b>    | 0.83                      | 8.26E-05            | 3             | 10                 |
| <b>NCF2</b>    | 1.00                      | 2.66E-05            | 3             | 9                  |
| <b>SASH3</b>   | 1.03                      | 1.00E-03            | 3             | 9                  |

|               |      |          |   |    |
|---------------|------|----------|---|----|
| <b>ADA</b>    | 0.91 | 5.45E-03 | 3 | 8  |
| <b>CD1D</b>   | 0.92 | 6.72E-04 | 3 | 8  |
| <b>LSP1</b>   | 0.75 | 1.79E-03 | 3 | 8  |
| <b>RGS19</b>  | 0.67 | 7.30E-03 | 3 | 8  |
| <b>PLEK</b>   | 0.96 | 8.11E-06 | 4 | 16 |
| <b>PSMB10</b> | 1.01 | 2.42E-05 | 4 | 14 |
| <b>PSME1</b>  | 0.55 | 3.34E-02 | 4 | 13 |
| <b>PSMB8</b>  | 0.93 | 1.02E-02 | 4 | 11 |
| <b>WARS</b>   | 0.98 | 3.78E-03 | 4 | 9  |
| <b>CXCL10</b> | 1.13 | 1.85E-06 | 4 | 8  |
| <b>FCGR3B</b> | 1.16 | 1.40E-06 | 4 | 8  |
| <b>IDO1</b>   | 1.27 | 2.08E-07 | 4 | 8  |
| <b>IFIT3</b>  | 0.51 | 2.60E-02 | 4 | 8  |

\* Meta-Effect-Size: Hedges' g, which estimates the mean difference between AR and NAR group.

**Table S5. A) CMAP predictions with the KDG-based signature of AR.** The 67 drugs or compounds with negative connectivity score are listed here, at a p-value of <0.05. Correlation between the drug-induced transcript signature in CMAP with the KDG signature is represented by the connectivity scores, ranging from -1 to +1. A negative correlation emphasizes an inverse similarity between the two profiles, suggesting drug exposure reverses the expression of the AR gene signature.

| <b>Compound</b>     | <b>Connectivity score</b> | <b>p-value</b> | <b>Drug description</b>                                          |
|---------------------|---------------------------|----------------|------------------------------------------------------------------|
| Monastrol           | -0.31                     | 0.000          | NA                                                               |
| Indoprofen          | -0.30                     | 0.001          | NA                                                               |
| Mefenamic acid      | -0.29                     | 0.001          | Analgesic and anti-inflammatory                                  |
| Naftifine           | -0.29                     | 0.001          | Anti-fungal                                                      |
| Ticarcillin         | -0.29                     | 0.001          | Penicillin class anti-bacterial                                  |
| Memantine           | -0.29                     | 0.001          | N-methyl-D-aspartate (NMDA) receptor antagonist                  |
| PNU-0251126         | -0.29                     | 0.002          | NA                                                               |
| 4-hydroxyphenazone  | -0.28                     | 0.003          | NA                                                               |
| Carbimazole         | -0.28                     | 0.003          | Imidazole anti-thyroid agent                                     |
| Bemegride           | -0.28                     | 0.003          | NA                                                               |
| Azapropazone        | -0.28                     | 0.003          | NA                                                               |
| Niflumic acid       | -0.27                     | 0.004          | NA                                                               |
| Tolnaftate          | -0.27                     | 0.004          | Anti-fungal                                                      |
| Atracurium besilate | -0.27                     | 0.004          | Non-depolarizing neuromuscular blocking agent                    |
| Timolol             | -0.26                     | 0.008          | Non-selective beta adrenergic antagonist                         |
| Diprophylline       | -0.26                     | 0.008          | Theophylline derivative with broncho- and vasodilator properties |
| Gabexate            | -0.26                     | 0.008          | NA                                                               |
| Streptozocin        | -0.26                     | 0.008          | Antibiotic (but used as antineoplastic)                          |
| Disopyramide        | -0.26                     | 0.009          | Class 1 (sodium channel blocker) anti-arrhythmic agent           |
| Sulfaphenazole      | -0.26                     | 0.009          | Sulphonamide antibacterial                                       |
| Aciclovir           | -0.26                     | 0.009          | Antiviral                                                        |
| Levodopa            | -0.26                     | 0.010          | Amino acid precursor of dopamine                                 |
| Dacarbazine         | -0.26                     | 0.010          | Alkylating agent                                                 |
| Fulvestrant         | -0.25                     | 0.011          | Synthetic estrogen receptor antagonist                           |
| Spironolactone      | -0.25                     | 0.011          | Aldosterone antagonist                                           |
| Clemastine          | -0.25                     | 0.012          | Histamine H1 antagonist                                          |
| Nadolol             | -0.25                     | 0.012          | Non-selective beta adrenergic antagonist                         |

|                       |       |       |                                                                                                        |
|-----------------------|-------|-------|--------------------------------------------------------------------------------------------------------|
| Cimetidine            | -0.25 | 0.012 | Histamine-2 receptor antagonist                                                                        |
| Metformin             | -0.25 | 0.013 | Biguanide hypoglycaemic agent                                                                          |
| Gly-His-Lys           | -0.25 | 0.014 | NA                                                                                                     |
| Acetohexamide         | -0.25 | 0.016 | Sulfonylurea hypoglycemic agent                                                                        |
| Oxybutynin            | -0.24 | 0.016 | Antispasmodic and anticholinergic                                                                      |
| Propofol              | -0.24 | 0.016 | Anaesthetic agent, facilitates inhibitory neurotransmission mediated by gamma-aminobutyric acid (GABA) |
| 5155877               | -0.24 | 0.018 | NA                                                                                                     |
| Syrosingopine         | -0.24 | 0.016 | NA                                                                                                     |
| Diloxanide            | -0.24 | 0.018 | NA                                                                                                     |
| Minocycline           | -0.23 | 0.021 | Tetracycline antibiotic                                                                                |
| Isoxicam              | -0.24 | 0.018 | NA                                                                                                     |
| Sulindac sulfide      | -0.24 | 0.019 | Non-steroidal anti-inflammatory agent                                                                  |
| Naftopidil            | -0.24 | 0.019 | NA                                                                                                     |
| chlormezanone         | -0.23 | 0.025 | NA                                                                                                     |
| ursolic acid          | -0.23 | 0.025 | Naturally occurring compound                                                                           |
| alfaxalone            | -0.23 | 0.026 | NA                                                                                                     |
| quipazine             | -0.23 | 0.027 | NA                                                                                                     |
| eticlopride           | -0.23 | 0.028 | NA                                                                                                     |
| Prestwick-642         | -0.23 | 0.029 | NA                                                                                                     |
| piperacetazine        | -0.23 | 0.029 | NA                                                                                                     |
| adiphenine            | -0.23 | 0.029 | NA                                                                                                     |
| 5162773               | -0.23 | 0.030 | NA                                                                                                     |
| iocetamic acid        | -0.23 | 0.030 | NA                                                                                                     |
| lincomycin            | -0.23 | 0.031 | Lincosamide antibiotic                                                                                 |
| levobunolol           | -0.23 | 0.032 | Ophthalmic beta-blocker                                                                                |
| benzocaine            | -0.23 | 0.032 | Topical anaesthetic                                                                                    |
| iohexol               | -0.23 | 0.033 | Non-ionic contrast agent                                                                               |
| BW-B70C               | -0.23 | 0.033 | NA                                                                                                     |
| metronidazole         | -0.23 | 0.033 | Antibiotic                                                                                             |
| dizocilpine           | -0.23 | 0.034 | NA                                                                                                     |
| decamethonium bromide | -0.22 | 0.037 | Agonist of nicotinic acetylcholine receptors                                                           |

|                 |       |       |                                                                  |
|-----------------|-------|-------|------------------------------------------------------------------|
| tretinoin       | -0.22 | 0.038 | all- <i>trans</i> -retinoic acid (ATRA), derivative of vitamin A |
| colistin        | -0.22 | 0.038 | Antibiotic                                                       |
| naproxen        | -0.22 | 0.039 | Non-steroidal anti-inflammatory                                  |
| sulindac        | -0.22 | 0.040 | Non-steroid anti-inflammatory                                    |
| isotretinoin    | -0.22 | 0.041 | Retinoid derivative of vitamin A                                 |
| alprenolol      | -0.22 | 0.045 | NA                                                               |
| oxyphenbutazone | -0.22 | 0.046 | NA                                                               |
| meteneprost     | -0.22 | 0.046 | NA                                                               |
| vancomycin      | -0.22 | 0.048 | Antibiotic                                                       |

NA: Not applicable, denoting drugs/compounds without USA market availability.

**Table S5. B) Drugs in current clinical use which target the individual key driver genes (DrugBank)**

| Key Driver Gene | Drugs in Clinical Use             |
|-----------------|-----------------------------------|
| CASP1           | Minocycline, Acetylsalicylic acid |
| EVI2A           | NDI                               |
| MNDA            | NDI                               |
| RASSF2          | NDI                               |
| LCP1            | NDI                               |
| GPR65           | NDI                               |
| MYO1F           | NDI                               |
| HCK             | Bosutinib                         |
| VAV1            | Pazopanib, Bosutinib, Dasatinib   |
| PLEK            | NDI                               |
| PSME1           | NDI                               |
| PSMB10          | Carfilzomib                       |
| CRLF3           | NDI                               |
| CD3D            | Muromonab, Blinatumomab           |

Drugs with US market availability only. NDI, no drugs identified.

**Table S6. Taqman™ (Thermo Fisher, MA USA) primers for real-time polymerase chain reaction**

| <b>Gene Symbol</b>            | <b>Assay ID</b> | <b>Dye Label</b> |
|-------------------------------|-----------------|------------------|
| <b>MNDA (Ifi205)</b>          | Mm04204354_mH   | FAM-MGB          |
| <b>CASP1</b>                  | Mm00438023_m1   | FAM-MGB          |
| <b>CCL5</b>                   | Mm01302427_m1   | FAM-MGB          |
| <b>TNF<math>\alpha</math></b> | Mm00443258_m1   | FAM-MGB          |
| <b>CXCL9</b>                  | Mm00434946_m1   | FAM-MGB          |
| <b>IL2</b>                    | Mm00434256_m1   | FAM-MGB          |
| <b>GPR65</b>                  | Mm00433695_m1   | FAM-MGB          |
| <b>CRLF3</b>                  | Mm00658175_m1   | FAM-MGB          |
| <b>EVI2A</b>                  | Mm03030107_s1   | FAM-MGB          |
| <b>PSMB10</b>                 | Mm00479052_g1   | FAM-MGB          |
| <b>VAV1</b>                   | Mm01232047_m1   | FAM-MGB          |
| <b>PSME1</b>                  | Mm00650858_g1   | FAM-MGB          |
| <b>LCPI</b>                   | Mm01310735_m1   | FAM-MGB          |
| <b>MYO1F</b>                  | Mm01271176_m1   | FAM-MGB          |
| <b>PLEK</b>                   | Mm00450970_m1   | FAM-MGB          |
| <b>HCK</b>                    | Mm01241463_m1   | FAM-MGB          |
| <b>CD3D</b>                   | Mm00442746_m1   | FAM-MGB          |
| <b>RASSF2</b>                 | Mm00615320_m1   | FAM-MGB          |

## References

1. Flechner SM, Kurian SM, Head SR, Sharp SM, Whisenant TC, Zhang J, et al. Kidney transplant rejection and tissue injury by gene profiling of biopsies and peripheral blood lymphocytes. *Am J Transplant.* 2004;4(9):1475-89.
2. O'Connell PJ, Zhang W, Menon MC, Yi Z, Schroppel B, Gallon L, et al. Biopsy transcriptome expression profiling to identify kidney transplants at risk of chronic injury: a multicentre, prospective study. *Lancet.* 2016;388(10048):983-93.
3. P B, Hayde N, Bao Y, Ye B, Calder RB, de Boccardo G, et al. A pathogenesis-based transcript signature in donor-specific antibody-positive kidney transplant patients with normal biopsies. *Genom Data.* 2014;2:357-60.
4. Reeve J, Sellares J, Mengel M, Sis B, Skene A, Hidalgo L, et al. Molecular diagnosis of T cell-mediated rejection in human kidney transplant biopsies. *Am J Transplant.* 2013;13(3):645-55.
5. Roedder S, Kimura N, Okamura H, Hsieh SC, Gong Y, and Sarwal MM. Significance and suppression of redundant IL17 responses in acute allograft rejection by bioinformatics based drug repositioning of fenofibrate. *PLoS One.* 2013;8(2):e56657.
6. Saint-Mezard P, Berthier CC, Zhang H, Hertig A, Kaiser S, Schumacher M, et al. Analysis of independent microarray datasets of renal biopsies identifies a robust transcript signature of acute allograft rejection. *Transpl Int.* 2009;22(3):293-302.
7. Racusen LC, Solez K, Colvin RB, Bonsib SM, Castro MC, Cavallo T, et al. The Banff 97 working classification of renal allograft pathology. *Kidney Int.* 1999;55(2):713-23.
8. Asaoka T, Kato T, Marubashi S, Dono K, Hama N, Takahashi H, et al. Differential transcriptome patterns for acute cellular rejection in recipients with recurrent hepatitis C after liver transplantation. *Liver Transpl.* 2009;15(12):1738-49.
9. Bohne F, Martinez-Llordella M, Lozano JJ, Miquel R, Benitez C, Londono MC, et al. Intra-graft expression of genes involved in iron homeostasis predicts the development of operational tolerance in human liver transplantation. *J Clin Invest.* 2012;122(1):368-82.
10. Einecke G, Reeve J, Sis B, Mengel M, Hidalgo L, Famulski KS, et al. A molecular classifier for predicting future graft loss in late kidney transplant biopsies. *J Clin Invest.* 2010;120(6):1862-72.
11. Gimino VJ, Lande JD, Berryman TR, King RA, and Hertz MI. Gene expression profiling of bronchoalveolar lavage cells in acute lung rejection. *Am J Respir Crit Care Med.* 2003;168(10):1237-42.
12. Halloran PF, Pereira AB, Chang J, Matas A, Picton M, De Freitas D, et al. Potential impact of microarray diagnosis of T cell-mediated rejection in kidney transplants: The INTERCOM study. *Am J Transplant.* 2013;13(9):2352-63.
13. Holweg CT, Potena L, Luikart H, Yu T, Berry GJ, Cooke JP, et al. Identification and classification of acute cardiac rejection by intragraft transcriptional profiling. *Circulation.* 2011;123(20):2236-43.
14. Khatri P, Roedder S, Kimura N, De Vusser K, Morgan AA, Gong Y, et al. A common rejection module (CRM) for acute rejection across multiple organs identifies novel therapeutics for organ transplantation. *J Exp Med.* 2013;210(11):2205-21.
15. Ling XB, Sigdel TK, Lau K, Ying L, Lau I, Schilling J, et al. Integrative urinary peptidomics in renal transplantation identifies biomarkers for acute rejection. *J Am Soc Nephrol.* 2010;21(4):646-53.
16. Morgun A, Shulzhenko N, Perez-Diez A, Diniz RV, Sanson GF, Almeida DR, et al. Molecular profiling improves diagnoses of rejection and infection in transplanted organs. *Circ Res.* 2006;98(12):e74-83.

17. Naesens M, Khatri P, Li L, Sigdel TK, Vitalone MJ, Chen R, et al. Progressive histological damage in renal allografts is associated with expression of innate and adaptive immunity genes. *Kidney Int.* 2011;80(12):1364-76.
18. Patil J, Lande JD, Li N, Berryman TR, King RA, and Hertz MI. Bronchoalveolar lavage cell gene expression in acute lung rejection: development of a diagnostic classifier. *Transplantation.* 2008;85(2):224-31.
19. Solez K, Colvin RB, Racusen LC, Sis B, Halloran PF, Birk PE, et al. Banff '05 Meeting Report: differential diagnosis of chronic allograft injury and elimination of chronic allograft nephropathy ('CAN'). *Am J Transplant.* 2007;7(3):518-26.
20. Hedges LV. Distribution Theory for Glass's Estimator of Effect Size and Related Estimators. *Journal of Educational Statistics.* 1981;6(2):107-28.
21. Field AP. Meta-analysis of correlation coefficients: A Monte Carlo comparison of fixed- and random-effects methods. *Psychol Methods.* 2001;6(2):161-80.
22. Hedges LVO, I. Statistical Methods for Meta-Analysis. *Orlando: Academic Press.* 1985.
23. Viechtbauer W. Conducting Meta-Analyses in R with the metafor Package. *Journal of Statistical Software [Online].* 2010;36(3):1-48.
24. Ritchie ME, Phipson B, Wu D, Hu YF, Law CW, Shi W, et al. limma powers differential expression analyses for RNA-sequencing and microarray studies. *Nucleic Acids Research.* 2015;43(7).
25. Marot G, and Mayer CD. Sequential Analysis for Microarray Data Based on Sensitivity and Meta-Analysis. *Stat Appl Genet Mol.* 2009;8(1).
26. Marot G, Foulley JL, Mayer CD, and Jaffrezic F. Moderated effect size and P-value combinations for microarray meta-analyses. *Bioinformatics.* 2009;25(20):2692-9.
27. Dongen SV. Graph Clustering by Flow Simulation. *PhD thesis, University of Utrecht.* 2000.
28. Choi Y, and Kendzioriski C. Statistical methods for gene set co-expression analysis. *Bioinformatics.* 2009;25(21):2780-6.
29. Zhang B, Gaiteri C, Bodea LG, Wang Z, McElwee J, Podtelezchnikov AA, et al. Integrated systems approach identifies genetic nodes and networks in late-onset Alzheimer's disease. *Cell.* 2013;153(3):707-20.
30. Korb K N. Bayesian Artificial Intelligence. *Chapman and Hall.* 2004.
31. Nachman I. The "ideal parent" structure learning for continuous variable networks. *Proceedings of the 20th Conference on Uncertainty in Artificial Intelligence.* 2004:400-9.
32. Glover F. *Handbook of Approximation Algorithms and Metaheuristics.* Taylor & Francis Group, LLC; 2007.
33. Wang IM, Zhang B, Yang X, Zhu J, Stepaniants S, Zhang C, et al. Systems analysis of eleven rodent disease models reveals an inflammatoric signature and key drivers. *Mol Syst Biol.* 2012;8:594.
34. Li L, Greene I, Readhead B, Menon MC, Kidd BA, Uzilov AV, et al. Novel Therapeutics Identification for Fibrosis in Renal Allograft Using Integrative Informatics Approach. *Scientific reports.* 2017;7:39487-.
35. Lamb J, Crawford ED, Peck D, Modell JW, Blat IC, Wrobel MJ, et al. The Connectivity Map: Using Gene-Expression Signatures to Connect Small Molecules, Genes, and Disease. *Science.* 2006;313(5795):1929.
36. Wishart DS, Knox C, Guo AC, Cheng D, Shrivastava S, Tzur D, et al. DrugBank: a knowledgebase for drugs, drug actions and drug targets. *Nucleic acids research.* 2008;36(Database issue):D901-D6.
37. Brazdziute E, and Laurinavicius A. Digital pathology evaluation of complement C4d component deposition in the kidney allograft biopsies is a useful tool to improve reproducibility of the scoring. *Diagn Pathol.* 2011;6 Suppl 1:S5.

38. Garcia-Rojo M, Sanchez J, de la Santa E, Duran E, Ruiz JL, Silva A, et al. Automated image analysis in the study of lymphocyte subpopulation in eosinophilic oesophagitis. *Diagn Pathol.* 2014;9 Suppl 1:S7.
